# Supplementary material for: On-site biosignal amplification using a single high-spin conjugated polymer
Source: PubMed Central journal article supplement — Nat Commun. 2025 Jan 4;16:396. doi: 10.1038/s41467-024-55369-6 (PMC11700166; doi:10.1038/s41467-024-55369-6), 2025-01-04
Supplement: 41467_2024_55369_MOESM1_ESM.pdf [file 41467_2024_55369_MOESM1_ESM.pdf]

## 27 **1. Experimental Details**

### 28 **Materials**

29 All the chemical reagents were purchased and used as received unless otherwise indicated. All air  
30 and water-sensitive reactions were performed under a nitrogen atmosphere. Dichloromethane  
31 (DCM), tetrahydrofuran (THF), toluene, and *N,N*-dimethylformamide (DMF) were dried using a  
32 JC Meyer solvent drying system before use. Ultradry solvents were obtained from J&K reagent  
33 company.

34

### 35 **Chemical structure and optoelectronic property characterization**

36 <sup>1</sup>H NMR and <sup>13</sup>C NMR spectra were recorded on a Bruker ARX-400 (400 MHz) spectrometer. All  
37 chemical shifts were reported in parts per million (ppm). <sup>1</sup>H NMR chemical shifts were referenced  
38 to CDCl<sub>3</sub> (7.26 ppm), and <sup>13</sup>C NMR chemical shifts were referenced to CDCl<sub>3</sub> (77.16 ppm). Mass  
39 spectra were recorded on a Fourier-transform high-resolution mass spectrometer (FTMS).  
40 Thermogravimetric analyses (TGA) were carried out on a TA Instrument Q600 SDT analyzer, and  
41 differential scanning calorimetry (DSC) analyses were performed on a TA Instrument Q2000  
42 analyzer. Absorption spectra were recorded on a PerkinElmer Lambda 750 UV-vis spectrometer.  
43 Cyclic voltammograms (CV) were measured through an electrochemical workstation SP-300  
44 (BioLogic Science Instruments). A standard three-electrode setup was established by employing  
45 glassy carbon as the working electrode (WE), a block of platinum mesh as the counter electrode  
46 (CE), and an Ag/AgCl electrode as the reference electrode (RE), further calibrated against ferrocene  
47 (Fc/Fc<sup>+</sup>). The measurements were carried out in an aqueous solution with 0.1 M NaCl or in  
48 acetonitrile with 0.1 M tetrabutylammonium hexafluorophosphate as the supporting electrolyte with  
49 a scan rate of 50 mV/s. HOMO and LUMO energy levels were obtained using the equation:  $E_{\text{HOMO}}$   
50  $= (E_{\text{Ox}} - E_{\text{Fc/Fc}^+} + 4.8) \text{ eV}$ ,  $E_{\text{LUMO}} = (E_{\text{Red}} - E_{\text{Fc/Fc}^+} + 4.8) \text{ eV}$ . Electron paramagnetic resonance (EPR)  
51 spectroscopy was conducted on a Bruker E580 spectrometer using ER 4122 SHQE highly sensitive  
52 EPR cavity. An Qxford EPR900 cryostat was used for temperature control. The microwave  
53 frequency is at 9.37 GHz.

54

### 55 **Gel permeation chromatography measurement**

56 Polymer number-average molecular weight ( $M_n$ ) and molecular weight distributions ( $\text{PDI} = M_w/M_n$ )

57 were measured by gel permeation chromatography (GPC). HFIP GPC analyses were performed on  
58 a Waters 1515 instrument equipped with a PLMIXED 7.5 × 50 mm guard column, two  
59 PLMIXED-C 7.5 × 300 columns, and a differential refractive index detector at 35 °C with a flow  
60 rate of 1 mL/min. The instrument was calibrated using 10 PS standards, and chromatograms were  
61 processed with Waters Breeze software.

62

### 63 **DFT calculations**

#### 64 a) Neutral states:

65 The geometries of P(THI-T), P(THI-2FT), P(THI-2CIT), and other polymers were optimized at  
66 the (R/U)B3LYP/6-311G(d,p) level in the gas phase using the Gaussian 16 software package<sup>1</sup>. For  
67 closed-shell singlet states, B3LYP was used. For open-shell states, UB3LYP and a broken-  
68 symmetry approach were used. Long side chains were replaced with methyl groups to simplify the  
69 calculation. The  $\Delta E_{ST}$  was calculated from the energy difference between the open-shell singlet and  
70 triplet states. The diradical character index ( $y_0$ ) was performed at the PUHF/6-311G(d,p) level (*Nat*  
71 *Commun.* 12, 5889 (2021)) and calculated by the following equations (*Nat. Commun.* 13, 2258  
72 (2022); *Phys. Chem. Chem. Phys.* 20, 24227-24238 (2018)):

$$73 \quad y_0 = 1 - \frac{2T}{1 + T^2}, T = \frac{n_{HOMO} - n_{LUMO}}{2}$$

74 where  $n_{HOMO}$  and  $n_{LUMO}$  are the occupancy numbers of the HOMO and LUMO in the natural orbital  
75 analysis.

76 The spin density distribution was performed at the U $\omega$ B97XD/6-311G(d,p) level. The bond  
77 length alternation (BLA) and the energy ( $E_{neutral}$ ) were performed at the  $\omega$ B97XD/6-311G(d,p) level.  
78 The relaxed potential energy surface (PES) of the dihedral angles in these polymer building blocks  
79 was performed at the  $\omega$ B97XD/6-311G(d,p) level. For each building block, the defined dihedral  
80 angle was fixed while the rest of the building block was allowed to relax. The planarity indexes  
81  $|\cos^2\phi|$  of these polymer building blocks were calculated according to the literature (*Angew. Chem.*  
82 *Int. Ed.* 60, 1364-1373 (2021)).

#### 83 b) Charged states:

84 The geometries of charged P(THI-T), P(THI-2FT), P(THI-2CIT), and other polymers were  
85 optimized at the UB3LYP/6-311G(d,p) level in the gas phase. The energies ( $E_{positive}$  and  $E_{negative}$ ) and

86 the PES of the dihedral angles in these charged polymer building blocks were performed at the  
87 U $\omega$ B97XD/6-311G(d,p) level (*Nat Commun.* 13, 5970 (2022)). The planarity indexes  $\langle \cos^2\varphi \rangle$  of  
88 these charged polymer building blocks were also calculated according to the literature (*Angew.*  
89 *Chem. Int. Ed.* 60, 1364-1373 (2021)).

90 c) Visualization:

91 Molecular frontier orbitals and energy levels were extracted by Gaussian View 6<sup>2</sup>. The spin  
92 density distribution and bond length alternation (BLA) were visualized by Multiwfn<sup>3</sup> and VMD<sup>4</sup>.

93

#### 94 **Planarization index $\langle \cos^2\varphi \rangle$**

95 The  $\langle \cos^2\varphi \rangle$  index was first proposed by Perepichka et al. (*Angew. Chem. Int. Ed.* 60, 1364-  
96 1373 (2021)). In their work, they presented a detailed calculation process for evaluating the planarity  
97 of a polymer backbone, which involves three steps:

98 a) First, the relaxed potential energy surface (PES) of the dihedral angles in the polymer  
99 building blocks was calculated at the  $\omega$ B97XD/6-311G(d,p) level. For each building block, the  
100 defined dihedral angle ( $\varphi$ ) was fixed while the rest of the building block was allowed to relax. After  
101 the PES calculation, the energy profile  $E(\varphi)$  was extracted, showing the potential energy distribution  
102 as the dihedral angles between the "TH unit" and "thiophene/fluorinated thiophene/chlorinated  
103 thiophene" varied from 0° to 180° at intervals of 10°.

104 b) The probability function  $P(\varphi)$  is calculated using a Boltzmann distribution:

$$105 \quad P(\varphi) = Ae^{-\frac{E(\varphi)}{RT}}$$

106 where  $\varphi$  is 0° and  $\pm 180^\circ$  for *s*-trans and *s*-cis conformations, respectively,  $T = 298$  K, and  $A$  is  
107 a normalizing factor.

108 c) By considering all their torsional conformations and their relative contributions to the overall  
109 structural disorder, the concept of the planarization index  $\langle \cos^2\varphi \rangle$  was proposed to quantify  
110 planarity as a collective property within the thermodynamic ensemble:

$$111 \quad \langle \cos^2\varphi \rangle = \frac{\int_0^{2\pi} P(\varphi) \cos^2\varphi d\varphi}{\int_0^{2\pi} P(\varphi) d\varphi}$$

112 The  $\langle \cos^2\varphi \rangle$  is well-suited as a representation of backbone planarity because it:

113 a) serves as a natural sinusoidal approximation of  $\pi$ -orbital overlap (*Chem. Eur. J.* 15, 8613-

114 8624 (2009)), also observed as the Karplus relationship for spin coupling in NMR (*J. Am. Chem.*  
115 *Soc.* 85, 2870-2871 (1963));

116 b) equates *s*-cis and *s*-trans conformations, focusing solely on planarity;

117 c) ranges between 0 (perpendicular) and 1 (coplanar);

118 d) is linearly related to the Wiberg bond order (B.O.) of the bridging C-C bond, representing  
119 the degree of  $\pi$ -conjugation (*Tetrahedron* 24, 1083-1096 (1968)).

120 Based on these points, we employed the planarization index  $\langle \cos^2\phi \rangle$  to quantify backbone  
121 planarity in our manuscript.

122

### 123 **Charge carrier density calculations**

124 Charge carrier density can be calculated by the mobility and charge carrier concentration in  
125 electrochemical doping. Taking the hole density as an example :

$$126 \quad J = \frac{I}{A} = \frac{I}{W \times d} = \sigma E = ep\mu_h \frac{V}{L}$$

127 where  $J$  is the current density derived from the current ( $I$ ) and the cross-sectional area of the  
128 channel ( $W \times d$ ) in electrochemical doping.  $\sigma$  is the conductivity, and  $E$  is the built-in electric field  
129 determined by the source-drain voltage ( $V$ ) and channel length ( $L$ ).  $e$  is the elementary charge, and  
130  $p$  is the hole density. The hole mobility ( $\mu_h$ ) has been obtained by analyzing the transfer  
131 characteristic curve. Therefore, the estimated hole density of P(TII-2FT) is  $5.10 \times 10^{20} \text{ cm}^{-3}$ .

132 Similarly, the electron density of P(TII-2FT) is estimated to be  $5.03 \times 10^{20} \text{ cm}^{-3}$ .

133 We can also estimate the charge carrier density by the capacitance ( $C$ ) and geometric  
134 parameters from GIWAXS, which is a common method for electrochemical systems (*J. Phys. Chem.*  
135 *C*, 116, 3132–3141 (2012)):

$$136 \quad Q = CV = C^*abcV = epabc$$

137 where the lattice parameters  $a = 3.57 \text{ \AA}$ ,  $b = 26.23 \text{ \AA}$ ,  $c = 25.46 \text{ \AA}$  is obtained from GIWAXS;  
138  $C^*$  of P(TII-2FT) is shown in Supplementary Table 3;  $V = 0.7 \text{ V}$ . Therefore, the calculated hole  
139 density and electron density are  $3.85 \times 10^{20} \text{ cm}^{-3}$  and  $6.04 \times 10^{20} \text{ cm}^{-3}$ , respectively. The electron  
140 density and hole density obtained from both methods are of the same order of magnitude,  
141 corresponding to a structure where approximately 2 to 3 charges are distributed per four segments,

142 consistent with empirical results.

143

#### 144 **Spectroelectrochemistry**

145 Spectroelectrochemistry was performed using an ITO-coated glass slide, which was spin-coated  
146 with the polymer solution ( $3 \times 10^{-3}$  M chloroform solution) at a rotating speed of 500 rpm for 45 s.  
147 These polymer-coated ITO slides were employed as the working electrode (WE) and immersed in  
148 a cuvette filled with a 0.1 M aqueous NaCl solution. A Pt mesh was used as the counter electrode  
149 (CE), and an AgCl/Ag pellet served as the reference electrode (RE). A PerkinElmer Lambda 750  
150 UV-vis spectrometer was used, with the beam path passing through the electrolyte-filled cuvette and  
151 the polymer-coated ITO samples. A background spectrum was recorded with the  
152 cuvette/electrolyte/ITO setup before a potential was applied to the cell. The potential was applied  
153 to the WE for 5 s before recording the spectra and was maintained for a certain amount of time until  
154 the completion of spectrum scanning.

155

#### 156 **Cytotoxicity**

157 The sample substrate was preloaded into a 6-well plate.  $5 \times 10^5$  mouse fibroblasts (L929) were  
158 seeded into each well and cultured in high glucose DMEM with 10% fetal bovine serum (FBS,  
159 6021031, DAKWE), 100 U/mL penicillin (Invitrogen), and 100 U/mL streptomycin (Invitrogen)  
160 at 37 °C with 5% CO<sub>2</sub> and 95% humidity. After 24 hours, a live/dead staining assay (cat# 40747ES76,  
161 Yeasen) was performed to evaluate the biocompatibility of the substrates. Briefly, cells were washed  
162 with 1×Assay Buffer. A working solution was prepared by adding 2 mM Calcein-AM solution and  
163 1.5 mM PI solution to 5 mL of 1×Assay buffer. The working solution and assay buffer were added  
164 to the cell culture plates at a ratio of 1:2 and incubated at 37 °C for 15 minutes. Live cells (green  
165 fluorescence) and dead cells (red fluorescence) were excited with a  $490 \pm 10$  nm laser (Nikon DS-  
166 F).

167

#### 168 **OECT fabrication and characterization**

169 The fabrication of OECTs involved several steps, including the deposition and patterning of metallic  
170 electrodes, the parylene layer, and the polymer in the channel. In detail, silica substrates were  
171 thoroughly cleaned by ultrasonication in acetone, DI water, and isopropyl alcohol. This

172 cleaning process was followed by nitrogen blow-drying and a brief oxygen plasma cleaning.  
173 Metal pad interconnects and source/drain contacts were patterned. Subsequently, 5 nm of Cr and  
174 35 nm of Au were deposited, and a lift-off process was performed. Metal interconnects and pads  
175 were insulated by depositing 1  $\mu\text{m}$  of parylene-C using a PDS 2010 Labcoater-2, along with a 3-  
176 (trimethoxysilyl)propyl methacrylate (A-174 silane) adhesion promoter. A 2% aqueous solution of  
177 industrial cleaner (Micro-90) was then spin-coated to act as an anti-adhesive for a second sacrificial  
178 1  $\mu\text{m}$  parylene-C film. This second film was used to simultaneously define the active channel area  
179 and pattern the underlying parylene layer. Samples were subsequently patterned with a 5  $\mu\text{m}$  thick  
180 layer of AZ9260 photoresist and AZ-400K developer. The patterned areas were opened by reactive  
181 ion etching with  $\text{O}_2$  plasma using an LCCP-6A reactive ion etcher (Leuven Instruments).

182 The manufacturing process for the vOECT inverter is similar to that of the OECT. Firstly, the  
183 bottom layer output end of the inverter was patterned on the cleaned wafer. Next, 5 nm of Cr and  
184 35 nm of Au were deposited and subjected to a lift-off process. A 0.5  $\mu\text{m}$  Parylene-C layer was  
185 deposited for insulation using PDS 2010 Labcoater-2, along with 3-(trimethoxysilyl)-propyl  
186 methacrylate (A-174 silane) as an adhesion promoter. Then, 5 nm of Cr and 35 nm of Au were  
187 deposited again using a similar method and subjected to lift-off, followed by depositing a 0.5  $\mu\text{m}$   
188 insulation layer using PDS 2010 Labcoater-2. The sample was then spin-coated with a 2% aqueous  
189 solution of industrial cleaner (Micro-90), followed by depositing 1  $\mu\text{m}$  of Parylene-C for insulation,  
190 which served as the sacrificial layer for the vOECT. Next, the sample was patterned using a 5  $\mu\text{m}$   
191 thick layer of AZ9260 photoresist and AZ-400K developer. An LCCP-6A reactive ion etcher  
192 (Leuven Instruments) and  $\text{O}_2$  plasma were used to open the patterned areas. The flexible vOECT  
193 device was fabricated using a similar method, with the difference being that the substrate used a  
194 wafer with a deposited 10  $\mu\text{m}$  parylene-C substitute for the cleaned wafer, which can be stripped  
195 with tweezers by immersion in a 0.1 M NaCl solution for 30 minutes.

196 The polymer was dissolved in chlorobenzene at a concentration of 5 mg/mL. The polymer  
197 solution was spin-cast onto the etched devices. After a peeling-off process of the second sacrificial  
198 parylene layer, the OECTs were ready for measurement. The device characterization was performed  
199 on a probe station using a Keithley 4200 SCS analyzer or an Fs-Pro semiconductor parameter  
200 analyzer, PDA. An AgCl/Ag pellet (Warner Instruments) was employed as the gate electrode and  
201 immersed in a 0.1 M NaCl solution, which covered the polymer film in the channel. The thickness

202 of the film was determined in a dry state using a DEKTAK profilometer (Bruker).

203

#### 204 **Electrochemical impedance spectra**

205 Electrochemical impedance spectra (EIS) were conducted on the polymer-coated electrodes using  
206 the electrochemical workstation SP-300 (BioLogic Science Instruments). Polymer films were  
207 patterned as squares with specific areas through the lithography technique. These polymer-coated  
208 electrodes with a glass substrate were employed as the working electrode and fully immersed in a  
209 0.1 M NaCl solution. Additionally, a Pt mesh (CE) and an AgCl/Ag pellet (RE) were employed to  
210 establish a standard three-electrode system. The capacitances of polymers measured on Au  
211 electrodes with various sizes were obtained through the potential-EIS method, with the DC offset  
212 voltage set to the maximum achievable doping for each polymer. The AC amplitude of voltage in  
213 the form of a sine wave on the WE was set at 10 mV (RMS), and the frequency was scanned  
214 from 1 Hz to 100 kHz. The resulting Bode plots and Nyquist plots were fitted to an equivalent  
215 circuit, specifically Randle's circuit  $R_s (R_p || C)$ , using the EC-Lab view software. The thickness  
216 of the film was determined in a dry state after testing with a DEKTAK profilometer (Bruker).

217

#### 218 **Simulated EEG monitoring**

219 The amplifier and the Au electrode, both with the same effective area on the same flexible device,  
220 were positioned on an agar model (2 wt%). An AgCl/Ag electrode was inserted into the model to  
221 simulate the EEG signal source. The signals from the Au electrode and amplifier were recorded  
222 using the Fs-Pro semiconductor parameter analyzer, PDA. MATLAB was used for software filtering.  
223 The signals were digitally filtered using a 50 Hz notch filter.

224

#### 225 **Preparation for in vivo ECoG recording**

226 For the in vivo experiments, mature female C57BL/6 mice, 8 weeks of age (Charles River  
227 Laboratories), were used throughout this study. The mice were maintained at  $22 \pm 1$  °C with humidity  
228 ranging from 30% to 70% and were kept on a 12-hour light/dark cycle, with ad libitum access to  
229 food. All 910 experiments were supervised and approved by the Animal Care & Use Committees at  
230 Tsinghua University (THU-LARC-2023-008). During the surgery, the mice were anesthetized with  
231 oxygen-vaporized isoflurane (3% for induction, 1.5-2% for maintenance, 0.5 L/min). Body



232 temperature was maintained at 37 °C. Craniotomies (1 mm<sup>2</sup>) were performed on the skull to expose  
233 the cortical surface without removing the dura mater. One silver wire coated with silver chloride  
234 was inserted into the cortex to a depth of about 0.5 mm through the craniotomies, serving as the  
235 ground electrode. The flexible amplifier was placed in another opening. The craniotomy where the  
236 flexible amplifier was positioned was done in different locations revealing various cortical areas  
237 such as the motor (M1), somatosensory (S1), and primary visual (V1) cortices. During subsequent  
238 tests, a metal bar was affixed to the mouse's skull using dental methacrylate to stabilize the mouse's  
239 brain. The FPC connected to the flexible amplifier was secured to the metal fixed bar to prevent the  
240 device from moving on the mouse's brain.

241

#### 242 **Signal acquisition and processing**

243 A function generator, Keithley 3390, was used to bias the inverter ( $V_{DD}$ ). A PDA Source Meter was  
244 utilized to continuously record the output voltage of the amplifiers and the voltage from the AgCl/Ag  
245 or Au electrode at a sampling rate of 1 kHz, and exert a negative  $V_{SS}$  ( $V_{DD} - V_{SS} = 0.8$  V). MATLAB  
246 was used for software filtering. The signals were digitally filtered with a 50 Hz notch filter to  
247 eliminate interfering noise. Then, a bandpass filter ranging from 3 to 45 Hz was applied to focus on  
248 the significant frequency band.

249

#### 250 **AFM and GIWAXS characterization**

251 Atomic force microscopy (AFM) measurements were carried out using the Dimension icon  
252 ScanAsyst (Bruker). Two-dimensional grazing incidence wide-angle X-ray scattering (2D-  
253 GIWAXS) measurements were conducted on a Xenocs-SAXS/WAXS system with an X-ray  
254 wavelength of 1.5418 Å and an incidence angle of 0.2°. A Pilatus 300 K was used as a 2D detector.  
255 Data processing was performed using GIWAXS-Tools (2.3.1) software<sup>5</sup>.

256

257 **2. Supplementary Tables and Figures**

258

259 **Supplementary Table 1.** Calculated energy levels and  $\Delta E_{ST}$  values of P(TH-T), P(TH-2T), and  
260 P(TH-TT) with different repeating units (n).

|     | P(TH-T) |       |                 | P(TH-TT) |       |                 | P(TH-2T) |       |                 |
|-----|---------|-------|-----------------|----------|-------|-----------------|----------|-------|-----------------|
|     | HOMO    | LUMO  | $\Delta E_{ST}$ | HOMO     | LUMO  | $\Delta E_{ST}$ | HOMO     | LUMO  | $\Delta E_{ST}$ |
|     | (eV)    | (eV)  | (kcal/mol)      | (eV)     | (eV)  | (kcal/mol)      | (eV)     | (eV)  | (kcal/mol)      |
| n=1 | -5.08   | -2.81 | -18.27          | -5.06    | -2.86 | -17.76          | -5.00    | -2.86 | -17.33          |
| n=2 | -4.80   | -3.11 | -13.25          | -4.81    | -3.13 | -13.51          | -4.79    | -3.09 | -13.55          |
| n=3 | -4.69   | -3.24 | -11.14          | -4.72    | -3.24 | -12.14          | -4.72    | -3.18 | -12.83          |
| n=4 | -4.65   | -3.31 | -10.47          | -4.68    | -3.30 | -11.79          | -4.70    | -3.22 | -14.75          |

261

262 **Supplementary Table 2.** Summary of the optical and electrochemical properties of the polymers.

| polymer    | $\lambda_{sol}$ <sup>a</sup> | $\lambda_{film}$ <sup>b</sup> | HOMO <sup>c</sup> | LUMO <sup>c</sup> | $E_{g, opt}$ <sup>b</sup> | HOMO <sup>d</sup> | LUMO <sup>d</sup> | $\Delta E_{ST}$ <sup>d</sup> |
|------------|------------------------------|-------------------------------|-------------------|-------------------|---------------------------|-------------------|-------------------|------------------------------|
|            | (nm)                         | (nm)                          | (eV)              | (eV)              | (eV)                      | (eV)              | (eV)              | (kcal/mol)                   |
| P(TH-T)    | 949                          | 1017                          | -4.59             | -3.99             | 0.87                      | -4.69             | -3.24             | -11.14                       |
| P(TH-2FT)  | 929                          | 923                           | -4.76             | -4.05             | 0.95                      | -4.84             | -3.41             | -11.32                       |
| P(TH-2CIT) | 922                          | 941                           | -4.89             | -4.03             | 0.92                      | -5.03             | -3.38             | -13.62                       |

263 <sup>a</sup> in CF solution; <sup>b</sup> in thin film; <sup>c</sup> obtained by CV measurement; <sup>d</sup> estimated from DFT calculations.

264

265 **Supplementary Table 3.** Summary of the OECT performance of the polymers.

| polymer    | polarity | $g_{m, norm}$                      | $V_{Th}$ (V) <sup>b</sup> | $\mu C^*$                                                          | $C^*$                 | $\mu_{h/e}$ <sup>d</sup>                           |
|------------|----------|------------------------------------|---------------------------|--------------------------------------------------------------------|-----------------------|----------------------------------------------------|
|            |          | (S cm <sup>-1</sup> ) <sup>a</sup> |                           | (F cm <sup>-1</sup> V <sup>-1</sup> s <sup>-1</sup> ) <sup>c</sup> | (F cm <sup>-3</sup> ) | (cm <sup>2</sup> V <sup>-1</sup> s <sup>-1</sup> ) |
| P(TH-T)    | p        | 44.6±3.7                           | -0.10±0.006               | 122.2±9.9                                                          | 157±27                | 0.78±0.15                                          |
|            | n        | 2.2±0.3                            | 0.76±0.008                | 16.4±1.5                                                           | 203±28                | 0.08±0.01                                          |
| P(TH-2FT)  | p        | 50.1±5.0                           | -0.39±0.014               | 158.6±21.4                                                         | 88±11                 | 1.07±0.3                                           |
|            | n        | 36.7±4.6                           | 0.64±0.006                | 147.4±13.2                                                         | 138±13                | 1.80±0.14                                          |
| P(TH-2CIT) | p        | 32.3±1.9                           | -0.44±0.004               | 96.4±5.9                                                           | 180±27                | 0.54±0.09                                          |
|            | n        | 15.2±1.6                           | 0.63±0.007                | 63.0±5.2                                                           | 214±9                 | 0.30±0.03                                          |

266 <sup>a</sup> The *W/L* of all the devices is 100/10  $\mu\text{m}$ . All the OEET devices were operated in a 0.1 M NaCl  
 267 aqueous solution; <sup>b</sup>  $V_{\text{th}}$  was determined by extrapolating the corresponding  $I_{\text{DS}}^{1/2}$  vs.  $V_{\text{GS}}$ ; <sup>c</sup> Six  
 268 devices were tested and computed for each polymer. <sup>d</sup>  $\mu$  was calculated from  $\mu C^*$  and the measured  
 269 volumetric capacitance  $C^*$ .

270

271 **Supplementary Table 4.** OEET performance of the three polymers before and after GPC

272 fractionation.

|             | polarity | $g_{\text{m, norm, origin}}$<br>( $\text{S cm}^{-1}$ ) | $\mu C^*_{\text{origin}}$<br>( $\text{F cm}^{-1} \text{V}^{-1} \text{s}^{-1}$ ) | $g_{\text{m, norm, GPC}}$<br>( $\text{S cm}^{-1}$ ) | $\mu C^*_{\text{GPC}}$<br>( $\text{F cm}^{-1} \text{V}^{-1} \text{s}^{-1}$ ) |
|-------------|----------|--------------------------------------------------------|---------------------------------------------------------------------------------|-----------------------------------------------------|------------------------------------------------------------------------------|
| P(THI-2FT)  | p        | 32.1 $\pm$ 1.9                                         | 83.2 $\pm$ 5.3                                                                  | 50.1 $\pm$ 5.0                                      | 158.6 $\pm$ 21.4                                                             |
|             | n        | 19.6 $\pm$ 1.8                                         | 71.5 $\pm$ 6.4                                                                  | 36.7 $\pm$ 4.6                                      | 147.4 $\pm$ 13.2                                                             |
| P(THI-T)    | p        | 44.6 $\pm$ 3.7                                         | 122.2 $\pm$ 9.9                                                                 | 67.62 $\pm$ 1.5                                     | 179.7 $\pm$ 5.2                                                              |
|             | n        | 2.2 $\pm$ 0.3                                          | 16.4 $\pm$ 1.5                                                                  | 2.97 $\pm$ 0.4                                      | 21.4 $\pm$ 3.1                                                               |
| P(THI-2CIT) | p        | 32.3 $\pm$ 1.9                                         | 96.4 $\pm$ 5.9                                                                  | 43.5 $\pm$ 3.2                                      | 133.8 $\pm$ 9.7                                                              |
|             | n        | 15.2 $\pm$ 1.6                                         | 63.0 $\pm$ 5.2                                                                  | 19.2 $\pm$ 1.1                                      | 111.3 $\pm$ 7.5                                                              |

273

274 **Supplementary Table 5.** Summary of reported n-type and ambipolar OEET performances.

| Polymer            | Number | Polarity | HOMO <sup>a</sup><br>(eV) | LUMO <sup>a</sup><br>(eV) | $\mu C^*$<br>( $\text{F cm}^{-1} \text{V}^{-1} \text{s}^{-1}$ ) | Ref |
|--------------------|--------|----------|---------------------------|---------------------------|-----------------------------------------------------------------|-----|
| BBL <sub>152</sub> | 1      | n        | -6.12                     | -4.37                     | 25.9                                                            | 6   |
| f-BTI2TEG-FT       | 2      | n        | -5.59                     | -3.82                     | 15.2                                                            | 7   |
| P(C-T)             | 3      | n        | -5.53                     | -4.25                     | 7.6                                                             | 8   |
| p(gTDPP2FT)        | 4      | n        | -5.20                     | -3.86                     | 54.8                                                            | 9   |
| f-BTI2g-TVTCN      | 5      | n        | -5.57                     | -3.81                     | 41.3                                                            | 10  |
| p(C2F-V)           | 6      | n        | -6.12                     | -4.45                     | 108                                                             | 11  |
| f-BTI2g-TVTF       | 7      | n        | -5.60                     | -3.70                     | 90.2                                                            | 12  |
| P(gNDI-gT2)        | 8      | p        | -4.83                     | -4.12                     | N/A                                                             | 13  |
|                    |        | n        |                           |                           | 0.18                                                            |     |
| 2DPP-OD-TEG        | 9      | p        | -5.08                     | -3.82                     | 31.8                                                            | 14  |
|                    |        | n        |                           |                           | 6.8                                                             |     |

|                             |    |   |       |       |       |           |
|-----------------------------|----|---|-------|-------|-------|-----------|
| P(C4-T2-C0-EG)              | 10 | p | -5.0  | -4.0  | 0.13  | 15        |
|                             |    | n |       |       | 0.16  |           |
| P(C4-T2-C0-EG)              | 11 | p | -5.0  | -4.0  | ~0.2  | 16        |
|                             |    | n |       |       | 0.22  |           |
| PrC60MA:p(g2T-TT)<br>(95:5) | 12 | p |       |       | 22.8  | 17        |
|                             |    | n |       |       | 11.8  |           |
| PBBTL:BBL                   | 13 | p |       |       | 2.72  | 18        |
|                             |    | n |       |       | 1.36  |           |
| P(TII-2FT)                  | 14 | p | -4.76 | -4.05 | 158.6 | This work |
|                             |    | n |       |       | 147.4 |           |
| P(TII-T)                    | 15 | p | -4.59 | -3.99 | 179.7 | This work |
|                             |    | n |       |       | 21.4  |           |
| P(TII-2CIT)                 | 16 | p | -4.89 | -4.03 | 133.8 | This work |
|                             |    | n |       |       | 111.3 |           |

275 <sup>a</sup> CV measurement results.

276

277 **Supplementary Table 6.** Summary of the device stability for P(TII-2FT) and other reported OECT  
278 materials.

| Polymer        | Number | Cycles | Current<br>retention (%) | type | Optimal $\mu C^*$<br>( $F\text{ cm}^{-1}\text{ V}^{-1}\text{ s}^{-1}$ ) | Ref |
|----------------|--------|--------|--------------------------|------|-------------------------------------------------------------------------|-----|
| f-BTI2g-SVSCN  | 1      | 360    | 45                       | n    | 150.9                                                                   | 28  |
| f-BSeI2g-SVSCN | 2      | 360    | 90                       | n    | 191.2                                                                   | 28  |
| p(C2F-V)       | 3      | 60     | 77.2                     | n    | 107.56                                                                  | 11  |
| P(gTDPP2FT)    | 4      | 257    | 54                       | n    | 54.8                                                                    | 9   |
| f-BTI2g-TVTF   | 5      | 100    | 91                       | n    | 90.2                                                                    | 12  |
| p(g3T2)        | 6      | 720    | 15                       | p    | 161                                                                     | 29  |
| p(g2T2-g4T2)   | 7      | 720    | 87                       | p    | 522                                                                     | 29  |
| p(g1T2-g5T2)   | 8      | 720    | 98                       | p    | 496                                                                     | 29  |

|              |    |      |       |                   |       |           |
|--------------|----|------|-------|-------------------|-------|-----------|
| p(g0T2-g6T2) | 9  | 720  | 98    | p                 | 302   | 29        |
| PTDPP-DT     | 10 | 500  | 91    | p                 | 149   | 30        |
| 2DPP-OD-TEG  | 11 | 167  | 5     | Ambipolar, p type | 31.8  | 14        |
|              |    |      | 40    | Ambipolar, n type | 6.8   |           |
| P(TII-2FT)   | 12 | 1000 | 96.1  | Ambipolar, p type | 158.6 | This work |
|              |    |      | 104.5 | Ambipolar, n type | 147.4 |           |

279 All the unipolar materials are selected with the optimal OECT performance beyond  $50 \text{ F cm}^{-1} \text{ V}^{-1}$   
280 in the p-type or n-type operation regime.

281

282 **Supplementary Table 7.** Summary of the gain and supply voltage of different types of inverters.

| Polymer                         | Number | Inverter configuration | $V_{DD}$ (V) | Maximum gain | Normalized gain | Ref       |
|---------------------------------|--------|------------------------|--------------|--------------|-----------------|-----------|
| P(TII-2FT)                      | 1      | Ambipolar              | 0.8          | 809          | 1011            | This work |
| PrC60MA:p(g2T-TT)<br>95:5 (w:w) | 2      | Ambipolar              | 0.9          | 82           | 91.1            | 17        |
| p(C4-T2-C0-EG)                  | 3      | Ambipolar              | 0.8          | 28           | 35              | 15        |
| PBBTL:BBL (3:1)                 | 4      | Ambipolar              | 0.6          | 42           | 70              | 18        |
| 2DPP-OD-TEG                     | 5      | Ambipolar              | 1.4          | 50           | 36              | 14        |
| PIDTC16-BT, DCNBT-IDT           | 6      | Complementary          | 0.7          | 1.1          | 1.57            | 19        |
| PIDTPEG-BT, DCNBT-IDT           | 7      | Complementary          | 0.4          | 1.2          | 3               | 19        |
| BBL, P3HT                       | 8      | Complementary          | 0.7          | 46           | 65.7            | 20        |
| BBL, P3CPT                      | 9      | Complementary          | 0.6          | 12           | 20              | 21        |
| PNDI2TEG-2Tz, Pg2T-TT           | 10     | Complementary          | 0.6          | 23.4         | 39              | 22        |
| CNg4T2-CNT2, g4T2-T2            | 11     | Complementary          | 0.8          | 45           | 56.25           | 23        |
| f-BTI2g-TVT, g4T2-T2            | 12     | Complementary          | 1.4          | 148          | 105.7           | 12        |
| P3HT                            | 13     | Unipolar               | 0.75         | 8.7          | 11.6            | 24        |
| PEDOT: PSS                      | 14     | Unipolar               | 1.3          | 12.5         | 9.6             | 25        |
| PEDOT: PSS                      | 15     | Unipolar               | 0.6          | 82           | 136.7           | 26        |
| P3HT                            | 16     | Unipolar               | 0.85         | 10           | 11.8            | 20        |
| P3HT, PEDOT: PSS                | 17     | Unipolar               | 0.85         | 24           | 28.2            | 20        |
| PEDOT: PSS                      | 18     | Unipolar               | 0.8          | 107          | 133.8           | 27        |
| PFIBI-BT                        | 19     | OFET                   | 100          | 174          | 1.74            | 31        |
| PT-BTD:PDIFCN2                  | 20     | OFET                   | 100          | 84           | 0.84            | 31        |
| DNTT:PTCDI-C13                  | 21     | OFET                   | 4            | 130          | 32.5            | 31        |
| P1FIID-2FBT                     | 22     | OFET                   | 100          | 94           | 0.94            | 31        |

|                     |    |      |     |     |      |    |
|---------------------|----|------|-----|-----|------|----|
| PTDCNTVT            | 23 | OFET | 120 | 163 | 1.36 | 31 |
| PDVT-8:P(NDI2OD-T2) | 24 | OFET | 30  | 168 | 5.6  | 31 |

283

284 **Supplementary Table 8.** Comparison of the molecular packing parameters of the polymers under  
285 different operating conditions.

| Samples                                | (100)                        |                                           |                        | (010)                        |                                   |                        |
|----------------------------------------|------------------------------|-------------------------------------------|------------------------|------------------------------|-----------------------------------|------------------------|
|                                        | $q$<br>( $\text{\AA}^{-1}$ ) | $d_{\text{lamellar}}$<br>( $\text{\AA}$ ) | CL<br>( $\text{\AA}$ ) | $q$<br>( $\text{\AA}^{-1}$ ) | $d_{\pi-\pi}$<br>( $\text{\AA}$ ) | CL<br>( $\text{\AA}$ ) |
| pristine                               | 0.24                         | 26.2                                      | 79.9                   | 1.76                         | 3.57                              | 60.8                   |
| P(TII-T) NaCl <sub>(aq)</sub> soaked   | 0.24                         | 26.1                                      | 73.8                   | 1.77                         | 3.54                              | 46.0                   |
| n-doped                                | 0.24                         | 26.2                                      | 72.5                   | 1.76                         | 3.56                              | 43.4                   |
| p-doped                                | 0.24                         | 26.1                                      | 77.6                   | 1.78                         | 3.52                              | 47.4                   |
| pristine                               | 0.24                         | 26.3                                      | 85.4                   | 1.79                         | 3.51                              | 41.0                   |
| P(TII-2FT) NaCl <sub>(aq)</sub> soaked | 0.24                         | 26.4                                      | 84.0                   | 1.81                         | 3.47                              | 40.0                   |
| n-doped                                | 0.24                         | 26.7                                      | 98.7                   | 1.80                         | 3.48                              | 49.0                   |
| p-doped                                | 0.24                         | 26.7                                      | 96.9                   | 1.81                         | 3.46                              | 47.0                   |
| P(TII-2ClT) pristine                   | 0.23                         | 27.1                                      | 87.61                  | 1.80                         | 3.48                              | 42.1                   |

286

287

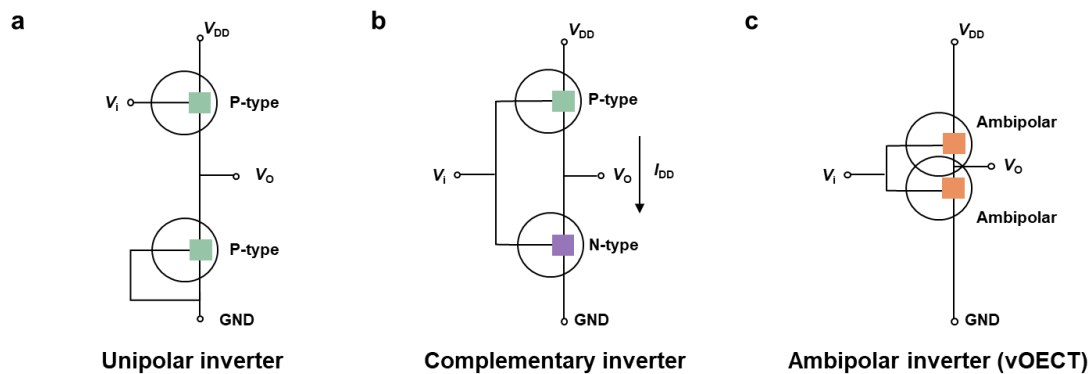

288

289 **Supplementary Fig. 1 Typical circuit diagrams of inverters** constructed by **a** a single p-type  
 290 material in a “diode-load” configuration, **b** both n-type and p-type materials, and **c** a single  
 291 ambipolar material with the vOECT structure.

292

293 Regarding OECT devices (Supplementary Fig. 1a-c), most studies of inverters constructed by  
 294 unipolar OECTs usually show lower performance (Fig. 4h) and a notable lack of evidence for their  
 295 effectiveness directly at the site of interest or within living organisms (in vivo). This shortcoming  
 296 has been addressed by complementary-type inverters (Supplementary Fig. 1b). However, n-type  
 297 materials generally have lower performance and poorer stability compared to their p-type  
 298 counterparts (Fig. 4g). This disparity often requires adjusting the geometric dimensions of the  
 299 channel to accommodate the unbalanced electronic properties of p-type and n-type materials  
 300 (*Science* 384, 557 (2024); *Sci. Adv.* 10, eadi9710 (2024)). This results in adverse effects such as  
 301 complex manufacturing processes, large footprints, low integration, and low device performance  
 302 (Fig. 4h). In addition, the poor stability of n-type OECT materials significantly limits the practical  
 303 applications of complementary circuits in bioelectronics. Ambipolar inverters with a cofacial  
 304 vertical OECT construction (vOECT) could effectively overcome these challenges (Supplementary  
 305 Fig. 1c). However, similar to n-type OECT materials, current ambipolar materials also show low  
 306 performance and poor device stability (Fig. 4f), which greatly limits the further development of  
 307 OECT-based logic circuits and amplifiers in bioelectronics. Unfortunately, the strategy for designing  
 308 a balanced, efficient, and stable ambipolar material is still unknown.





322 conjugated polymers with donor-acceptor (D-A) structures could effectively enhance ambipolar  
323 transport performance in organic field effect transistors (OFETs). However, this approach is not  
324 directly applicable to OECTs. In Supplementary Fig. 2a, we designed and synthesized a copolymer,  
325  $P(\text{gTDPP-MeOT2})_m(\text{gTDPP2CNT})_n$ , which combines two different types of OECT polymers:  
326  $P(\text{gTDPP-MeOT2})$  (p-type) and  $P(\text{gTDPP2CNT})$  (n-type). Based on OECT measurements, the  
327 optimized ratio of the polymer is  $m = 0.2$  and  $n = 0.8$ . Nevertheless, the unbalanced ambipolar  
328 performance and poor stability (Supplementary Fig. 2b-e) suggest that balanced and stable  
329 ambipolar OECTs cannot be achieved solely through engineering the molecular energy levels.

330 To further understand the relationship between molecular energy levels and the transport type  
331 of OECT materials, we compiled a list of polymers with D-A structures and their respective transport  
332 types, along with their molecular energy levels reported in recent literature for comparison  
333 (Supplementary Fig. 2f-g). For instance, compared to the p-type polymer IG-T, the polymer f-  
334 BTYI2g-TVT exhibits pure n-type OECT performance despite having a relatively higher HOMO  
335 energy level, which should be a p-type OECT material. A similar concern applies to  $P(\text{gDPP-T2})$ ,  
336 which is a p-type OECT material with a lower LUMO energy level compared to n-type OECT  
337 polymers f-BTYI2g-TVT and f-BTI2TEG-T. Among them,  $P(\text{gNDI-gT2})$  is an ambipolar OECT  
338 polymer with a narrow molecular bandgap. However, both its p-type and n-type OECT performance  
339 are not outstanding due to the twisted backbone and strong charge localization in the doped states.

340 Despite some deviations in the detailed values of energy levels under different CV test  
341 conditions, these results reveal that molecular energy levels are essential but not solely sufficient to  
342 determine the charge transport type in OECTs. Other crucial factors, such as molecular planarity  
343 and stability in the doped states, should also be adequately considered. We have discussed these  
344 aspects in the main text.

345

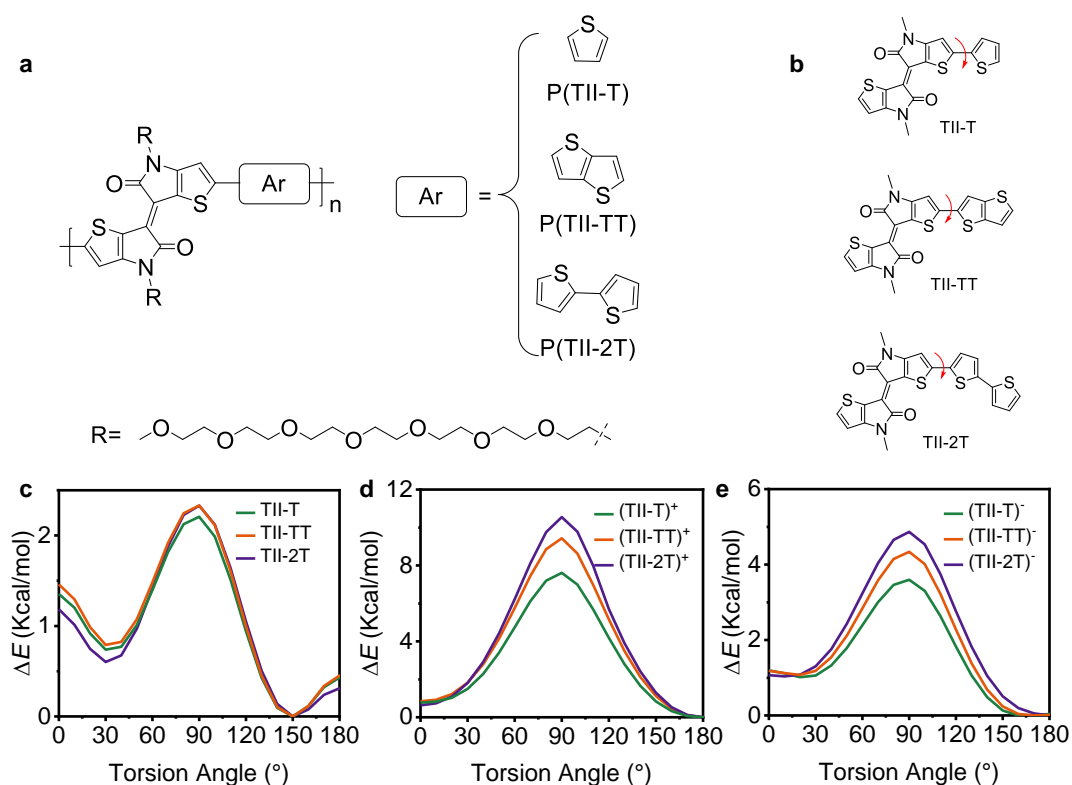

346

347 **Supplementary Fig. 3 Relaxed PES scans.** **a** Chemical structures of the three polymers: P(TII-T),  
 348 P(TII-TT) and P(TII-2T). **b** Molecular structures of the three monomers: TII-T, TII-TT, and TII-2T.  
 349 The EG side chains were replaced with methyl groups to simplify the calculation. Comparison of  
 350 the relaxed PES scans of the torsion angles for the monomers under **c** neutral, **d** positively, and **e**  
 351 negatively charged states. The torsion angles are the dihedral angles marked in Supplementary Fig.  
 352 3b.

353

354 The three monomers (TII-T, TII-TT, and TII-2T) exhibit similar planarity in their neutral or  
 355 charged states. However, as the repeating units increase, the conjugated backbone of the polymer  
 356 P(TII-2T) becomes twisted and non-planar due to the presence of torsional angles between the  
 357 bithiophene (2T) units. Consequently, an anomalous  $\Delta E_{ST}$  value occurs when the repeating units  
 358 reach 4 (Fig. 2d and Supplementary Table 1). Compared to P(TII-2T) and P(TII-TT) with the same  
 359 repeating unit, P(TII-T) displays the largest  $\Delta E_{ST}$  value, which led us to choose TII and T for  
 360 constructing the polymer.

361

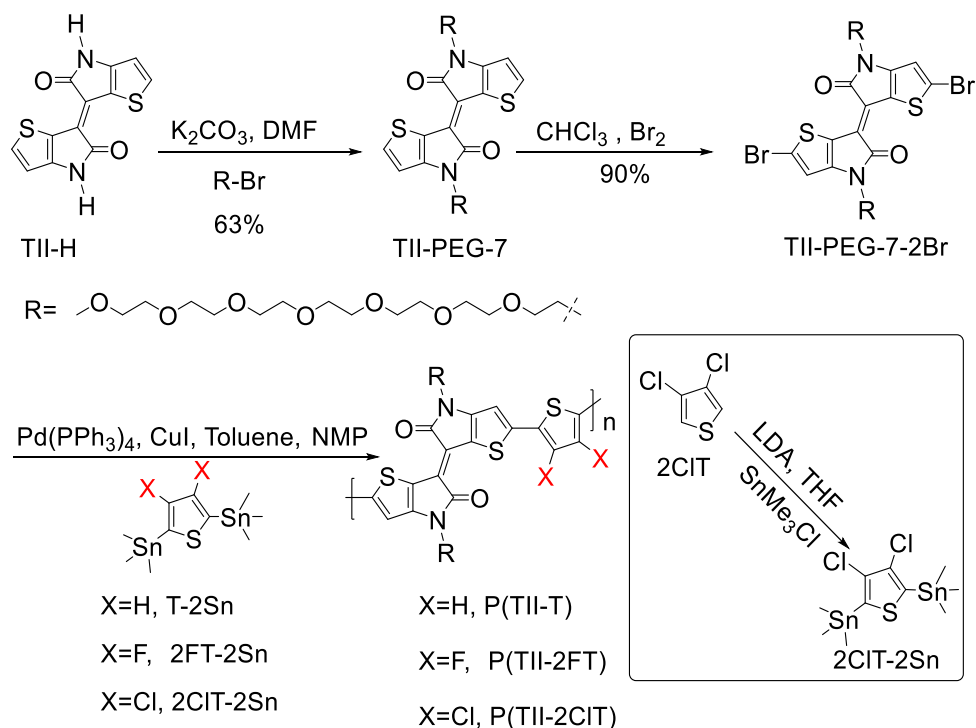

362

363 **Supplementary Fig. 4 Synthetic routes to the three polymers.** P(TII-T), P(TII-2FT), and P(TII-  
 364 2CIT).

365

366 The three polymers were synthesized through Pd-catalyzed Stille coupling reactions with CuI  
 367 as the co-catalyst, purified by Soxhlet extraction, and collected by chloroform. The molecular  
 368 weights of the three polymers were evaluated by gel permeation chromatography (GPC) with  
 369 hexafluoroisopropanol (HFIP) as the eluent (Supplementary Fig. 5). The three polymers show good  
 370 thermal stability with decomposition temperatures exceeding 300 °C (Supplementary Fig. 6 and  
 371 Supplementary Fig. 7).

372

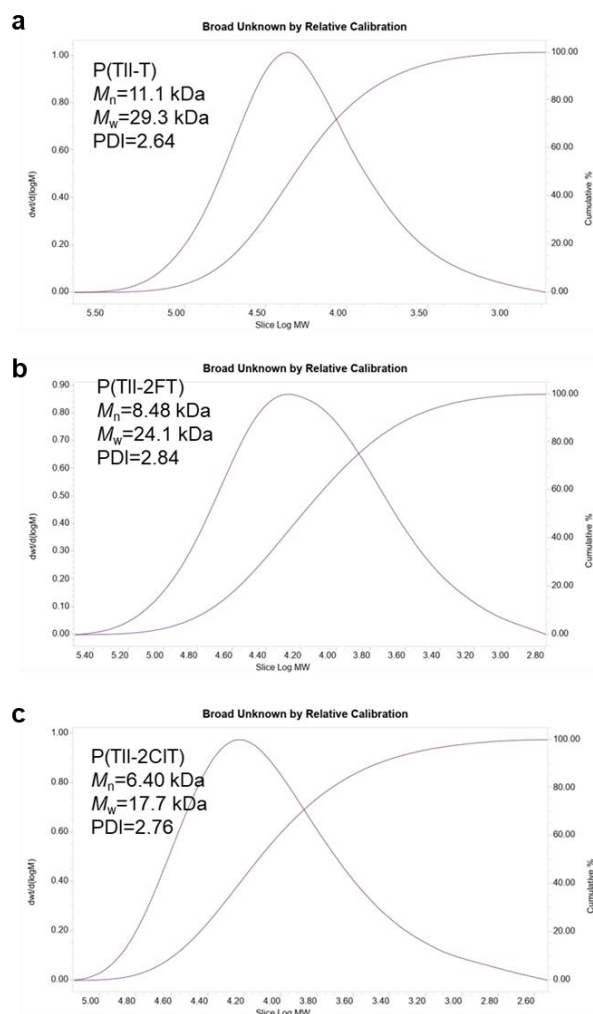

373

374 **Supplementary Fig. 5 Molecular weights and polymer dispersity index (PDI) of the polymers.**

375 **a** P(TII-T), **b** P(TII-2FT), and **c** P(TII-2CIT), measured by GPC with hexafluoroisopropanol (HFIP)

376 as the eluent.

377

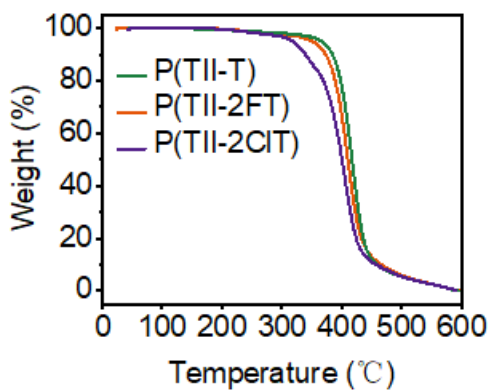

378

379 **Supplementary Fig. 6 Thermogravimetric analysis (TGA) of the polymers.**  $T_{d, P(TII-T)} = 365$  °C;

380  $T_{d, P(TII-2FT)} = 350$  °C;  $T_{d, P(TII-2CIT)} = 317$  °C.

381

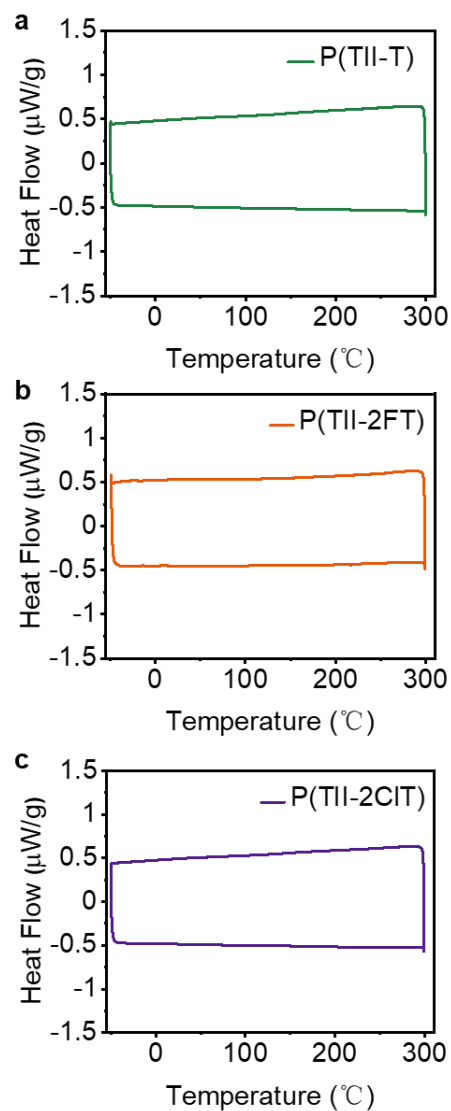

382

383 **Supplementary Fig. 7 Differential scanning calorimetry (DSC) of the polymers. a** P(TII-T), **b**  
 384 P(TII-2FT), and **c** P(TII-2CIT). All polymers do not show obvious endothermic or exothermic peaks  
 385 form -50 °C to 300 °C.

386

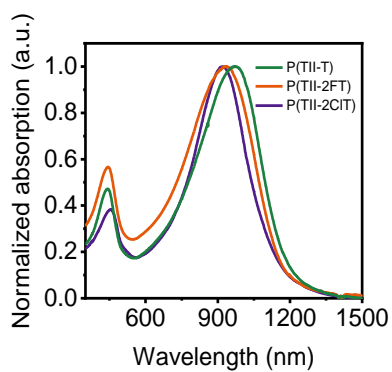

387

388 **Supplementary Fig. 8 The normalized UV-vis-NIR absorption spectra of the polymers. P(TII-**  
 389 **T), P(TII-2FT), and P(TII-2CIT), in chloroform solution.**

390

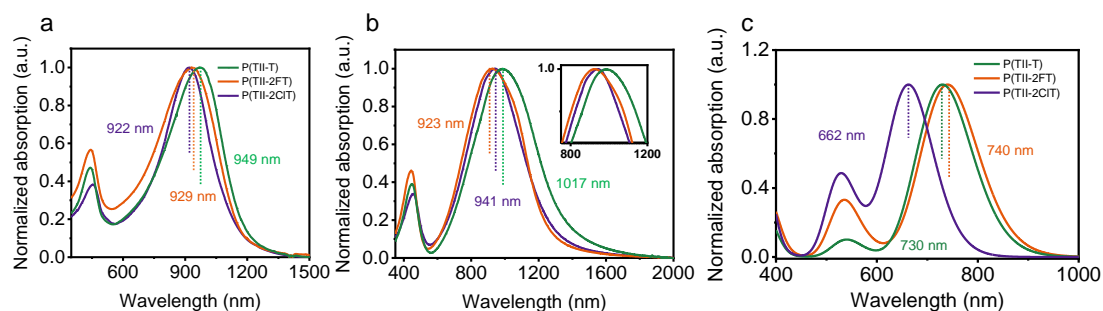

391

392 **Supplementary Fig. 9** The UV-visible absorption spectra of P(TII-T), P(TII-2FT), and P(TII-  
393 2CIT) in **a** dilute chloroform solution and **b** thin film. **c** DFT-calculated absorption spectra for these  
394 polymers at the CAM-B3LYP/6-311G(d,p) level in the gas phase.

395

396 We conducted DFT calculations to simulate the UV-visible absorption spectra of the three  
397 polymers in the gas phase. It can be observed that P(TII-2FT), P(TII-T), and P(TII-2CIT) exhibit  
398 progressively blue-shifted absorption spectra (Supplementary Fig. 9c). This phenomenon is  
399 inconsistent with the experimental observations that the absorption spectra of the three polymers  
400 progressively blue-shift in the order of P(TII-T), P(TII-2FT), and P(TII-2CIT) (Supplementary Fig.  
401 9a, b).

402 We analyzed the reasons for this difference: (1) The electronic spectra calculated by DFT  
403 represent the absorption spectra of the molecular backbones in the single-chain state, while the  
404 experimentally measured absorption spectra are obtained in solution or in film states. (2) Therefore,  
405 we first performed UV-vis-NIR absorption spectra of the three polymers in three solvents: CF, CB,  
406 and *o*-DCB. All their absorption spectra present similar changes, progressively red-shifted in the  
407 solvent order of CF, CB, and *o*-DCB (Supplementary Fig. 10a, b, and c). These relatively red-shifted  
408 absorption spectra imply strong solution-state aggregation behavior in *o*-DCB solution.

409 Similar phenomena have been widely observed in various types of high-mobility conjugated  
410 polymers (*Chem. Mater.* 36, 3726–3734 (2024); *Adv. Mater.* 32, 2002302 (2020)). As a result, *o*-  
411 DCB was chosen as the solvent to measure the temperature-dependent absorption spectra of the  
412 three polymers. All three polymers exhibit blue-shifted and weaker absorption spectra as the  
413 temperature increases (Supplementary Fig. 10d, e, and f), further suggesting that the three polymers  
414 all form an aggregated state in *o*-DCB solution at room temperature (R.T.) (*Angew. Chem. Int. Ed.*  
415 60, 8189–8197 (2021); *Macromolecules*, 45, 9611–9617 (2012)). These phenomena are more

416 pronounced when cooling down the heated solution to R.T. overnight, as the maximum absorption  
 417 peaks of the three polymers are slightly red-shifted compared to those of the heated solution cooled  
 418 down to R.T. immediately (Supplementary Fig. 10g, h, and i). These results indicate that even in the  
 419 solution state, P(TII-T), P(TII-2FT), and P(TII-2CIT) are all in aggregated states.

420 As discussed above, all three polymers are in an aggregated state whether in dilute solution or  
 421 in thin film. When molecules are in an aggregated state, the conjugated backbones are more planar.  
 422 Based on this conclusion, we flattened the conjugated backbones of P(TII-T) and P(TII-2CIT)  
 423 during theoretical calculations (Supplementary Fig. 11a, b). The DFT calculation results are as  
 424 follows: (1) The absorption spectra of P(TII-T) and P(TII-2CIT) with flattened backbones show  
 425 evident red-shift compared to before (the maximal absorption peaks of P(TII-T) and P(TII-2CIT)  
 426 shifted from 662/730 nm to 715/740 nm); (2) P(TII-T) exhibits the largest red-shifted absorption  
 427 spectrum, followed by P(TII-2FT) and P(TII-2CIT), which is consistent with the experimental  
 428 observations.  
 429

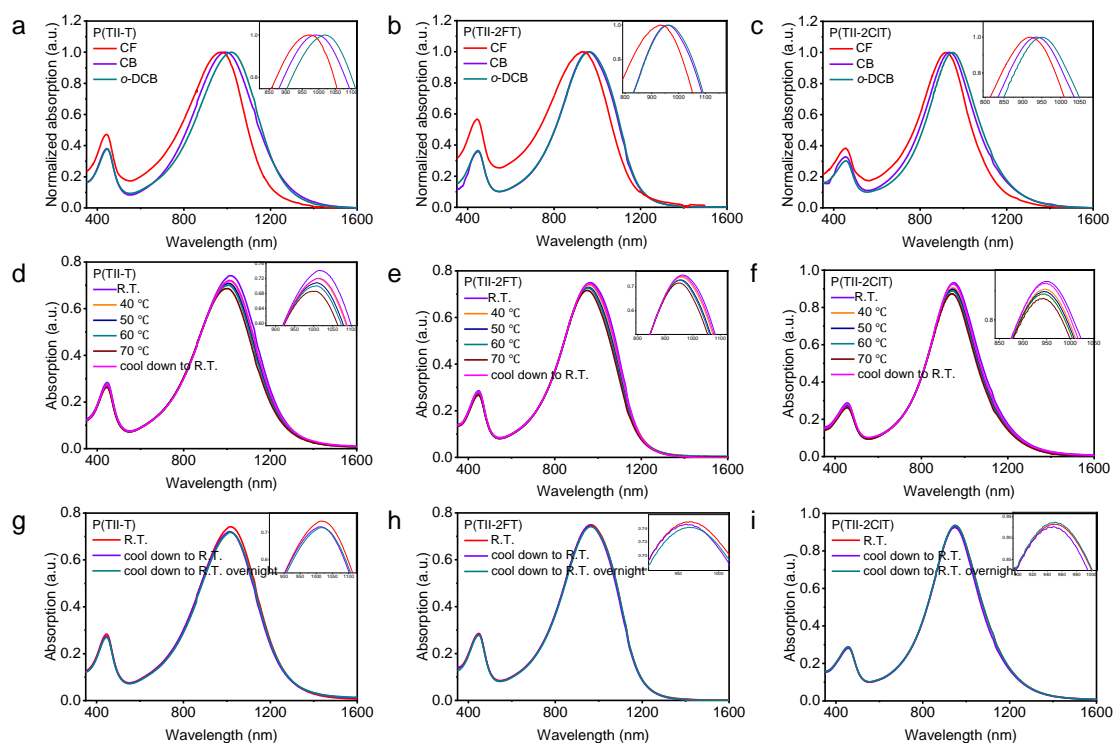

430

431 **Supplementary Fig. 10 Comparison of the UV-vis-NIR absorption spectra under different**  
 432 **testing conditions.** UV-vis-NIR absorption spectra of **a** P(TII-T), **b** P(TII-2FT), and **c** P(TII-2CIT)  
 433 in CF, CB, and *o*-DCB solution ( $1.0 \times 10^{-5}$  M). Temperature-dependent UV-vis-NIR absorption  
 434 spectra of **d** P(TII-T), **e** P(TII-2FT), and **f** P(TII-2CIT) in *o*-DCB. UV-vis-NIR absorption spectra

435 of **g** P(TII-T), **h** P(TII-2FT), and **i** P(TII-2CIT) in *o*-DCB solution at R.T. or the 70°C heated solution  
436 cooled down to R.T. immediately/overnight.

437

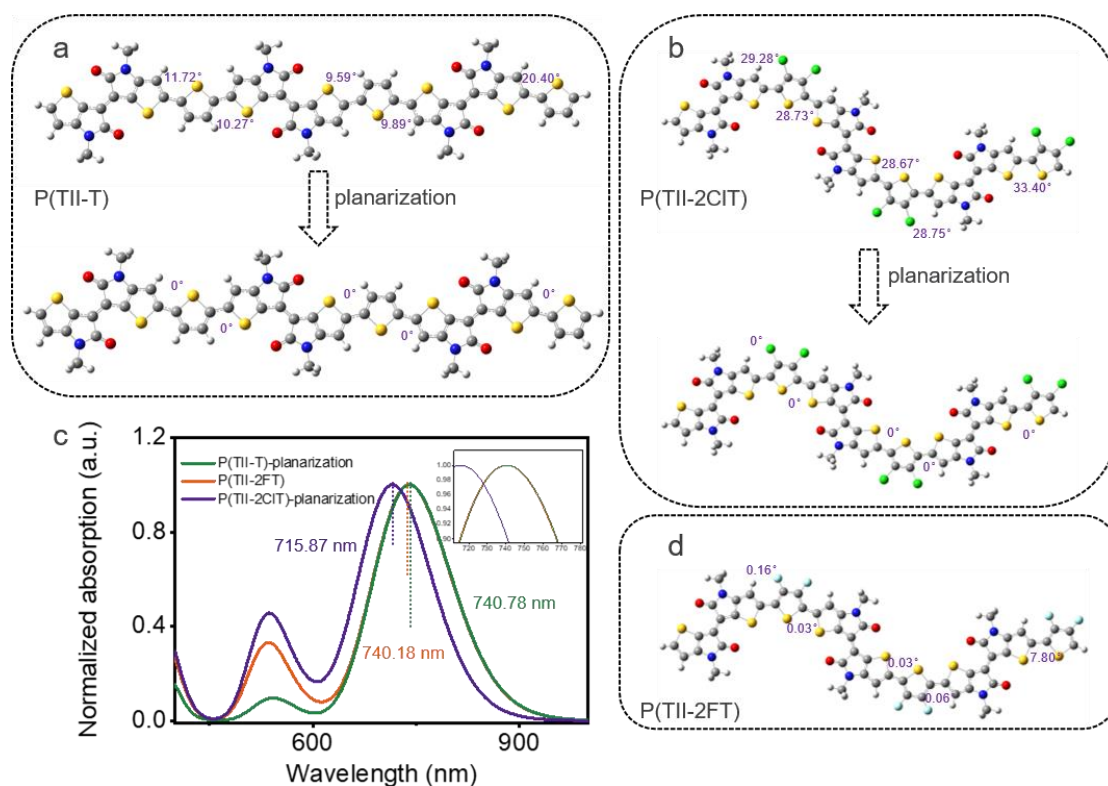

438

439 **Supplementary Fig. 11 Comparison of the calculated UV-vis-NIR absorption spectra with**  
440 **flattened polymer backbones.** Illustration of the flattened molecular backbones of **a** P(TII-T) and  
441 **b** P(TII-2CIT). **c** Calculated UV-vis-NIR absorption spectra of the flattened P(TII-T) and P(TII-  
442 2CIT). DFT calculations were performed at the CAM-B3LYP/6-311G(d,p) level in the gas phase. **d**  
443 DFT-optimized molecular backbone of P(TII-2FT).

444

445 In summary, the red-shifted absorption spectra of P(TII-T) compared to the other two polymers  
446 can be attributed to the following reasons: (1) Whether in solution or in thin film, the polymer P(TII-  
447 T) is in an aggregated state, thereby enhancing the planarity of the polymer backbone; (2) The  
448 enhanced planarity, coupled with the strong intramolecular D-A interactions in polymer P(TII-T),  
449 results in its absorption spectra exhibiting the most significant red-shift.

450



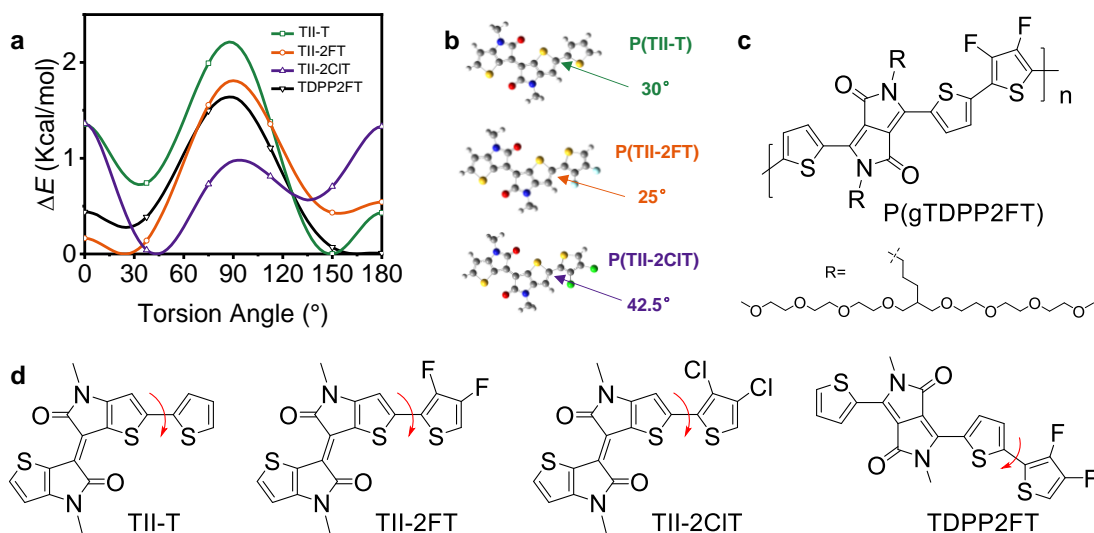

451

452

453

454

455

456

457

458

459

**Supplementary Fig. 12 Relaxed PES scans and optimized backbone structures.** **a** Comparison of the relaxed PES scans of the torsion angles for the monomers: TII-T, TII-2FT, TII-2CIT, and TDPP2FT. The torsion angles are the dihedral angles marked in Supplementary Fig. 12d. **b** Optimized backbone structures and dihedral angles for the monomers of P(TII-T), P(TII-2FT), and P(TII-2CIT). **c** Chemical structure of polymer P(gTDPP2FT). **d** Molecular structures of the four monomers: TII-T, TII-2FT, TII-2CIT, and TDPP2FT. The EG side chains were replaced with methyl groups to simplify the calculation.

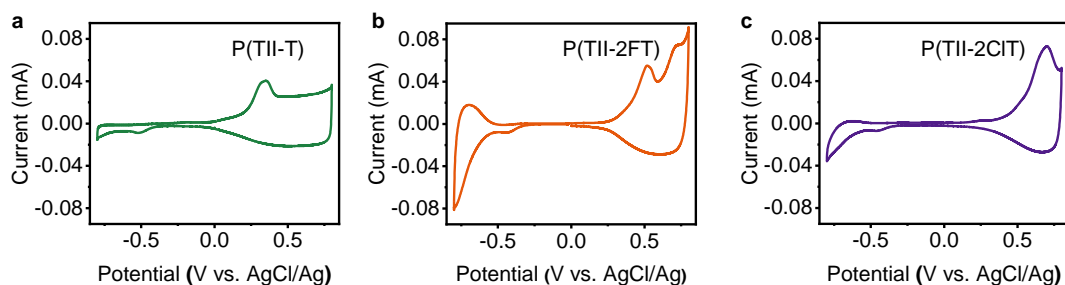

460

461

462

463

**Supplementary Fig. 13 Cyclic voltammograms of the polymers.** **a** P(TII-T), **b** P(TII-2FT), and **c** P(TII-2CIT), in acetonitrile solution with a 0.1 M NaCl aqueous solution as the electrolyte.

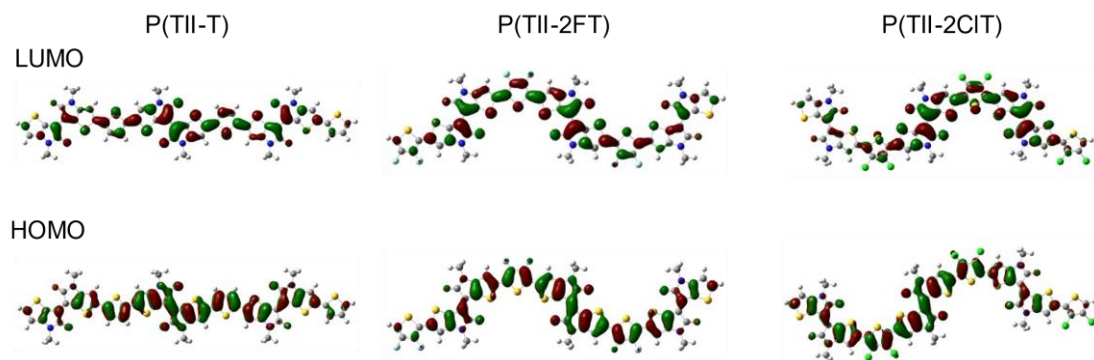

464

465

**Supplementary Fig. 14 DFT-optimized geometries and molecular frontier orbitals of the**

466 **trimers**. The EG side chains were replaced with methyl groups to simplify the calculation.

467

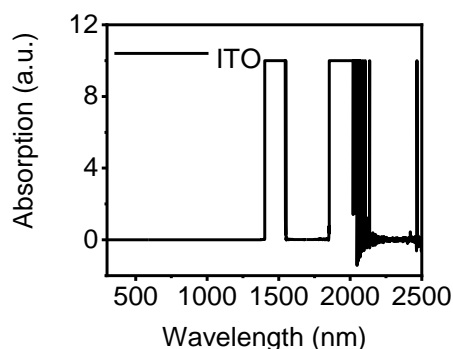

468

469 **Supplementary Fig. 15 The absorption spectrum of indium tin oxide (ITO) glass.** Due to the  
470 strong absorption of the ITO glass at wavelengths greater than 1400 nm, the absorption bands of  
471 these generated polarons/bipolarons from the polymers are partially obscured in the long-  
472 wavelength region.

473

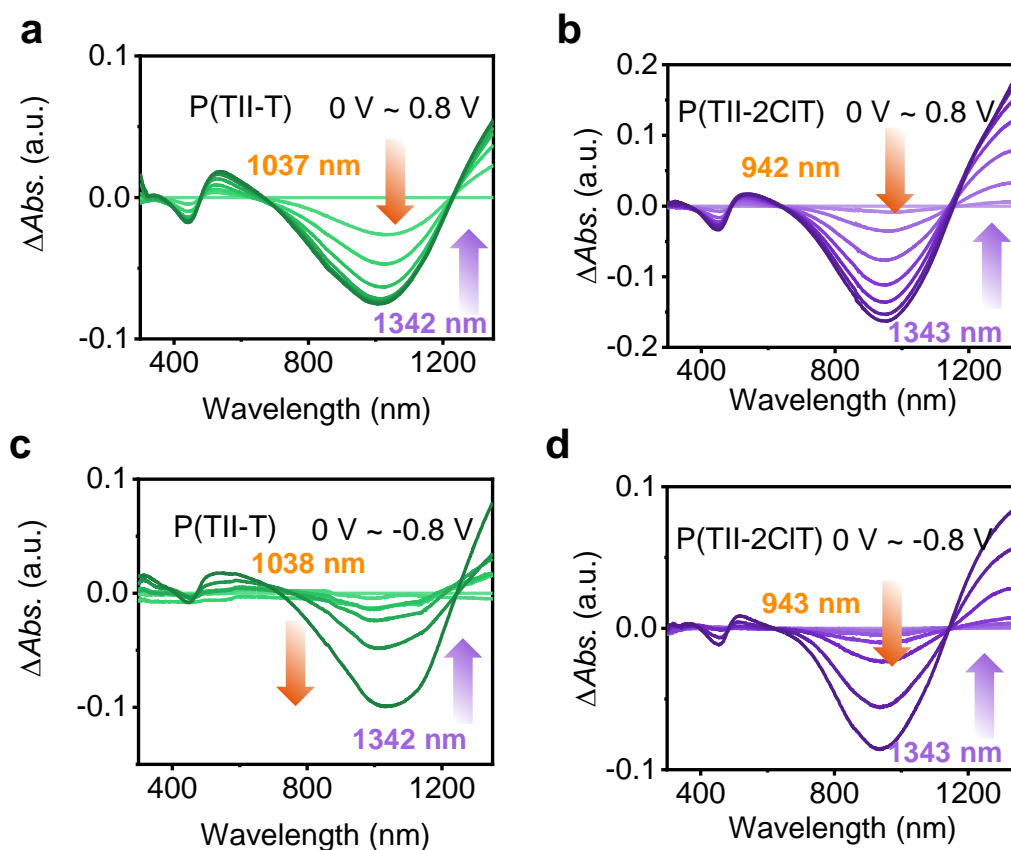

474

475 **Supplementary Fig. 16 Electrochemical absorption spectra of the polymers.** a/c P(TII-T) and  
476 b/d P(TII-2CIT), with positive voltages (0 to +0.8 V)/negative voltages (0 to -0.8 V) on ITO glass  
477 in a 0.1 M NaCl aqueous solution. The  $\Delta Abs.$  represents the difference in absorption intensity at

478 various bias voltages.

479

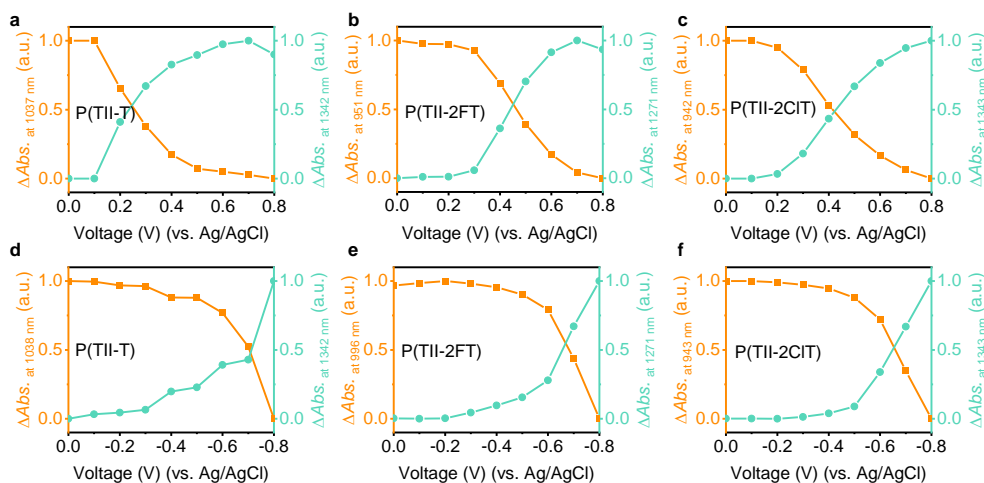

**Supplementary Fig. 17 Absorption intensity changes at the tagged wavelengths in the electrochemical absorption spectra. a/d P(TII-T), b/e P(TII-2FT), and c/f P(TII-2CIT), at the different bias voltages.**

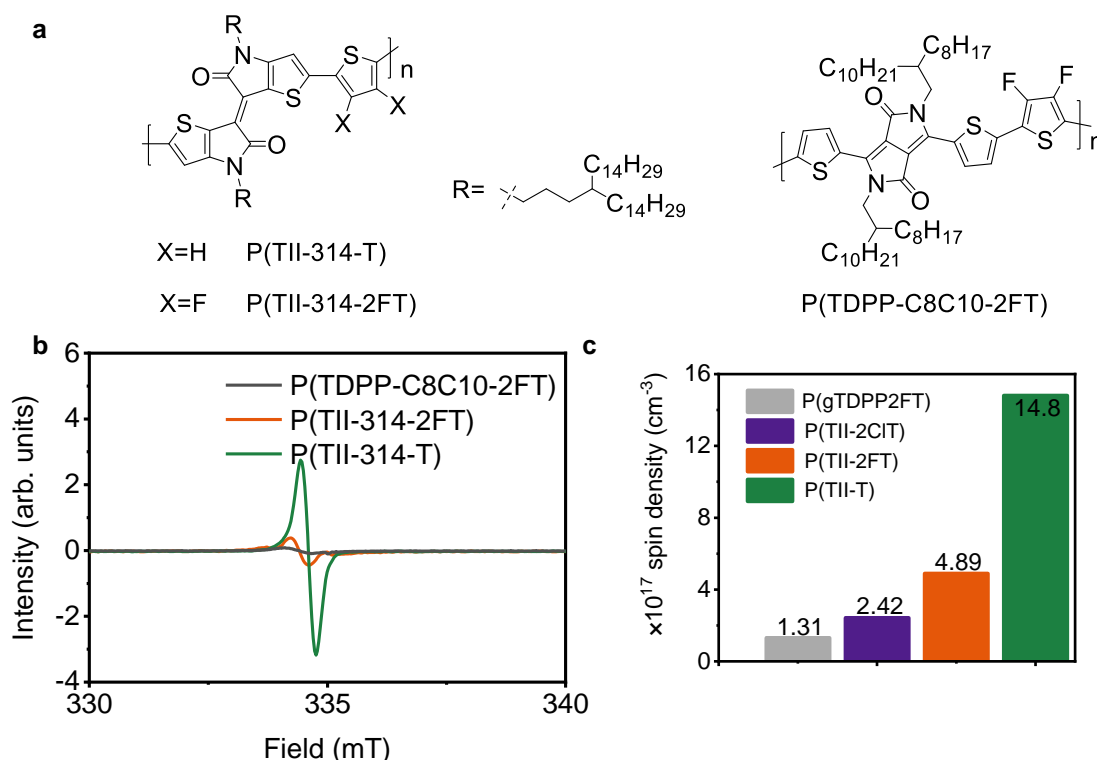

**Supplementary Fig. 18 Room temperature EPR signals. a** Chemical structures of the alkyl side chain functionalized polymers, P(TII-314-T), P(TII-314-2FT), and P(TDPP-C8C10-2FT). **b** Room temperature EPR signals of P(TII-314-T), P(TII-314-2FT), and P(TDPP-C8C10-2FT) in the solid state. **c** Spin densities of the powders of P(gTDPP2FT), P(TII-T), P(TII-2FT), and P(TII-2CIT) at room temperature.

491

492 An n-type OECT polymer, P(gTDPP2FT) (*Nat Commun.* 13, 5970 (2022)), which has a similar  
493 structure and backbone planarity ( $|\cos^2\phi| = 0.72$ ) to P(TII-2FT), was also employed for  
494 comparison (Supplementary Fig. 12c). At room temperature, P(TII-2CIT), P(TII-2FT), and P(TII-  
495 T) exhibited progressively stronger EPR signals, while P(gTDPP2FT) showed almost imperceptible  
496 signals (Fig. 3e), indicating its low spin intensity and a tendency to adopt an aromatic closed-shell  
497 electronic structure. The spin density extracted from EPR spectra is  $2.42 \times 10^{17} \text{ cm}^{-3}$  for P(TII-2CIT),  
498  $4.89 \times 10^{17} \text{ cm}^{-3}$  for P(TII-2FT), and  $1.48 \times 10^{18} \text{ cm}^{-3}$  for P(TII-T) (Supplementary Fig. 18c). To  
499 exclude interference from EG side chains, we synthesized three polymers with the same backbone  
500 but alkyl chains for comparison (Supplementary Fig. 18a), and their EPR spectra showed the same  
501 trends as the above results (Supplementary Fig. 18b). Thus, the strong EPR signals of the three TII-  
502 based polymers collectively indicate the presence of unpaired electrons in their backbone,  
503 suggesting that the polymers could adopt a high-spin electronic structure at room temperature. This  
504 conclusion is in agreement with the calculated results. The  $\Delta E_{ST}$  values are  $-10.00 \text{ kcal/mol}$  for  
505 P(TII-T),  $-10.11 \text{ kcal/mol}$  for P(TII-2FT),  $-13.06 \text{ kcal/mol}$  for P(TII-2CIT), and  $-17.66 \text{ kcal/mol}$   
506 for P(gTDPP2FT), respectively (Fig. 3d and Supplementary Fig. 19). Besides, the diradical  
507 character index ( $y_0$ ) was also calculated. Normally, the value of  $y_0$  ranges from 0 (a closed-shell  
508 characteristic) to 1 (pure diradical). The calculated  $y_0$  values for P(TII-T), P(TII-2FT), P(TII-2CIT),  
509 and P(gTDPP2FT) are 0.61, 0.60, 0.45, and 0.43, respectively (Fig. 3d). The large  $\Delta E_{ST}$  and  $y_0$   
510 values indicate that the order of the open-shell characteristics is as follows: P(TII-T) > P(TII-2FT) >  
511 P(TII-2CIT). The above results indicate that the open-shell characteristics of the polymers originate  
512 from the TII building blocks, confirming our rational building block screening strategy.

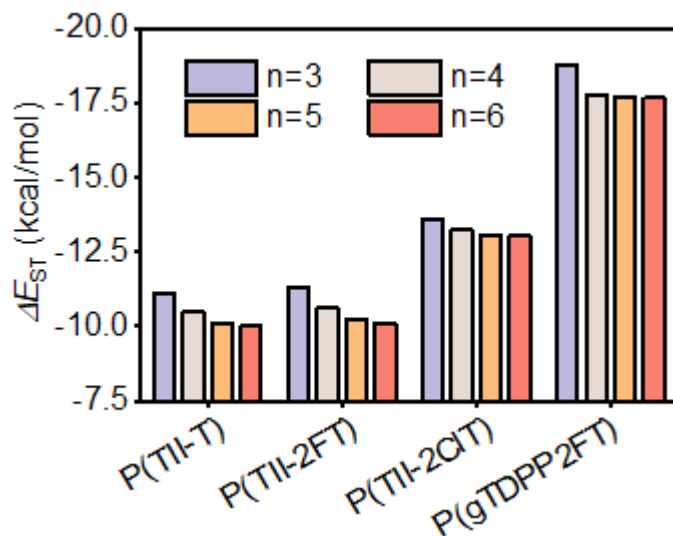

513  
 514 **Supplementary Fig. 19. Calculated  $\Delta E_{ST}$  values.** P(TII-T), P(TII-2FT), P(TII-2CIT), and  
 515 P(gTDPP2FT), with different repeating units ( $n=3, 4, 5, 6$ ).

516

517 As the number of repeating units increases, the calculated  $\Delta E_{ST}$  values of these four polymers  
 518 gradually become larger. This trend suggests that the actual polymers may exhibit larger  $\Delta E_{ST}$  values  
 519 and might even become positive values due to their longer conjugation lengths. Therefore, the actual  
 520 polymer with a calculated negative  $\Delta E_{ST}$  value may also display a high-spin character with the triplet  
 521 state as the ground state.

522

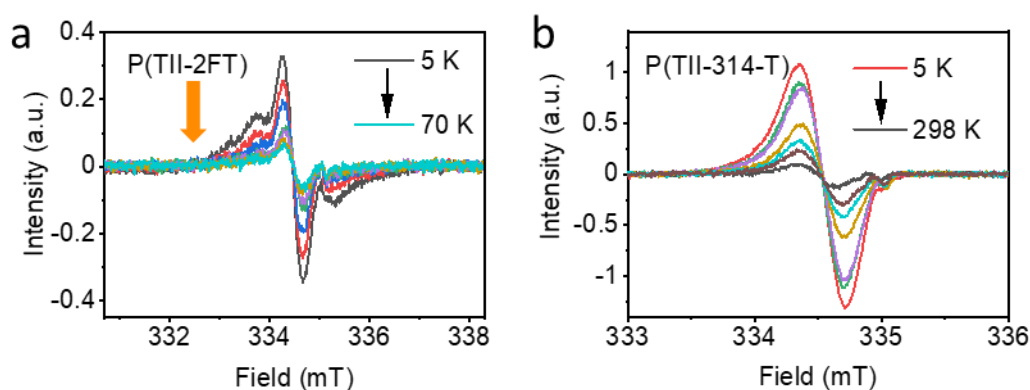

523

524 **Supplementary Fig. 20 Variable-temperature EPR signals.** **a** P(TII-2FT) and **b** P(TII-314-T), in  
 525 the solid state. The alkyl-substituted polymer P(TII-314-T) exhibits a decreasing trend in EPR  
 526 signals as the temperature increases, similar to P(TII-2FT) and P(TII-T). This result further  
 527 indicates that the unpaired electrons originate from their backbones rather than the EG side chains,  
 528 suggesting the potential presence of a triplet ground state in the backbones of P(TII-2FT) and P(TII-  
 529 T).

530

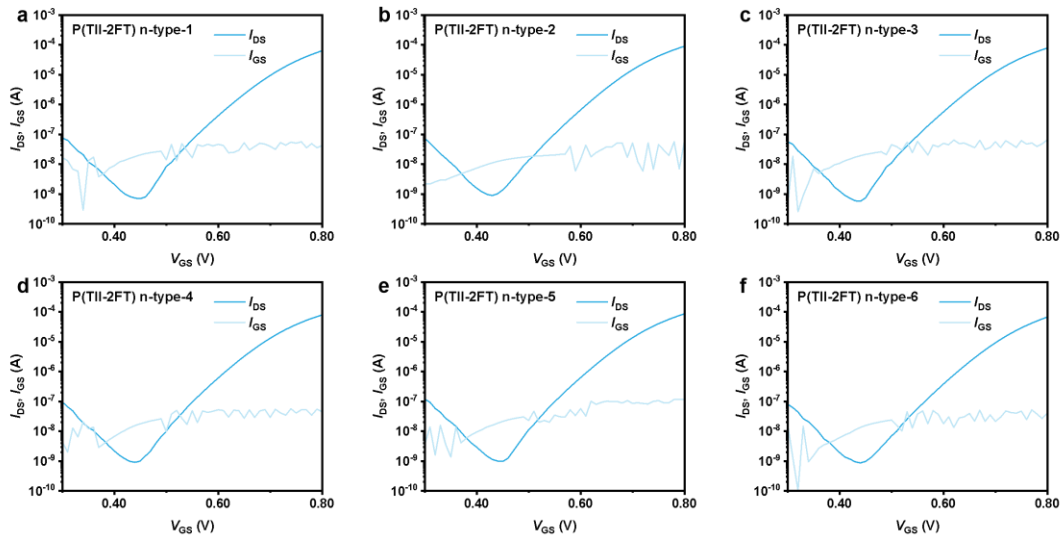

531

532 **Supplementary Fig. 21 Six typical n-type OECT transfer characteristics** based on P(TII-2FT)  
533 before GPC fractionation. The dark line indicates the source-drain current, and the light line  
534 indicates the leakage current of the gate.

535

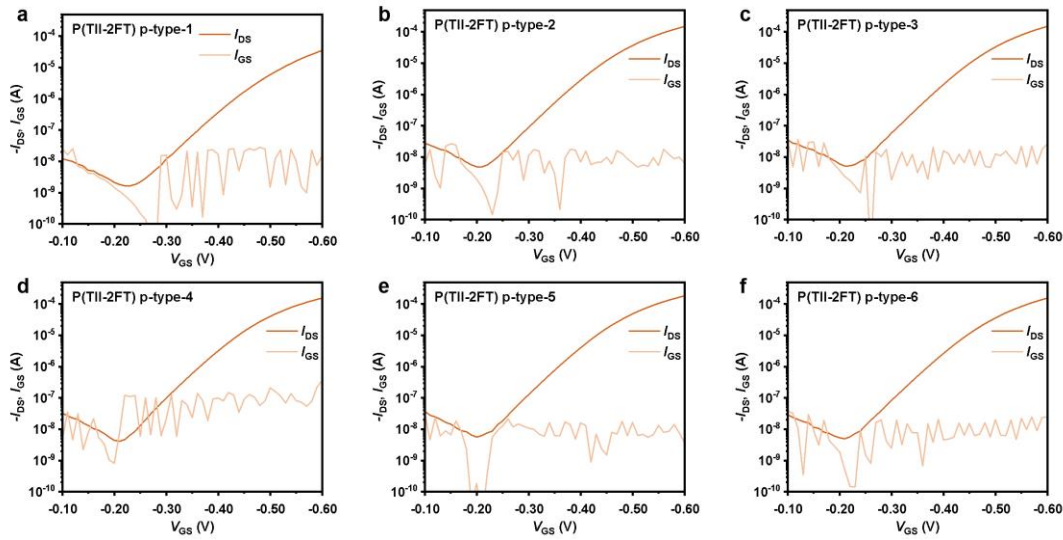

536

537 **Supplementary Fig. 22 Six typical p-type OECT transfer characteristics** based on P(TII-2FT)  
538 before GPC fractionation. The dark line indicates the source-drain current, and the light line  
539 indicates the leakage current of the gate.

540

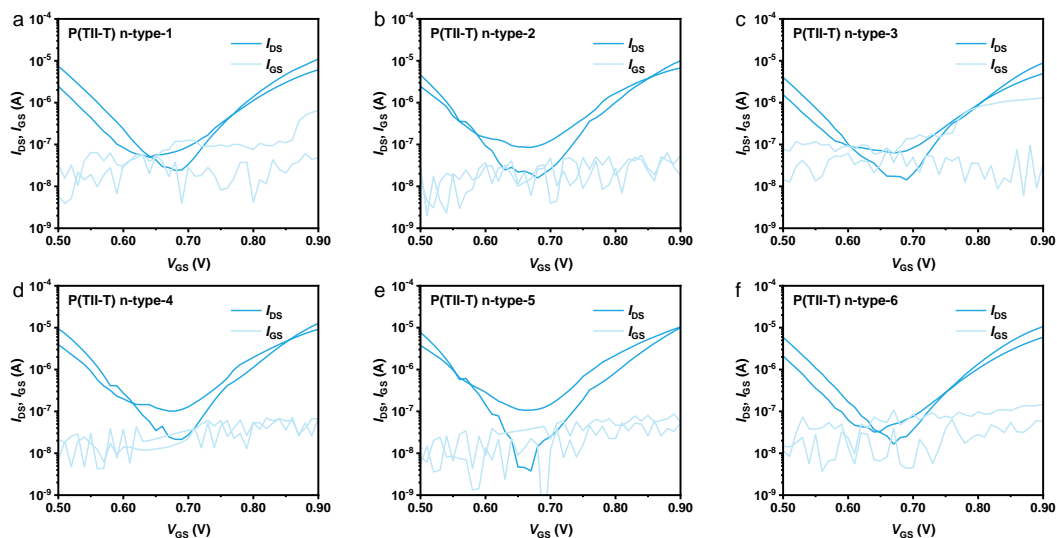

541

542 **Supplementary Fig. 23 Six typical n-type OECT transfer characteristics** based on P(TII-T)  
 543 before GPC fractionation. The dark line indicates the source-drain current, and the light line  
 544 indicates the leakage current of the gate.

545

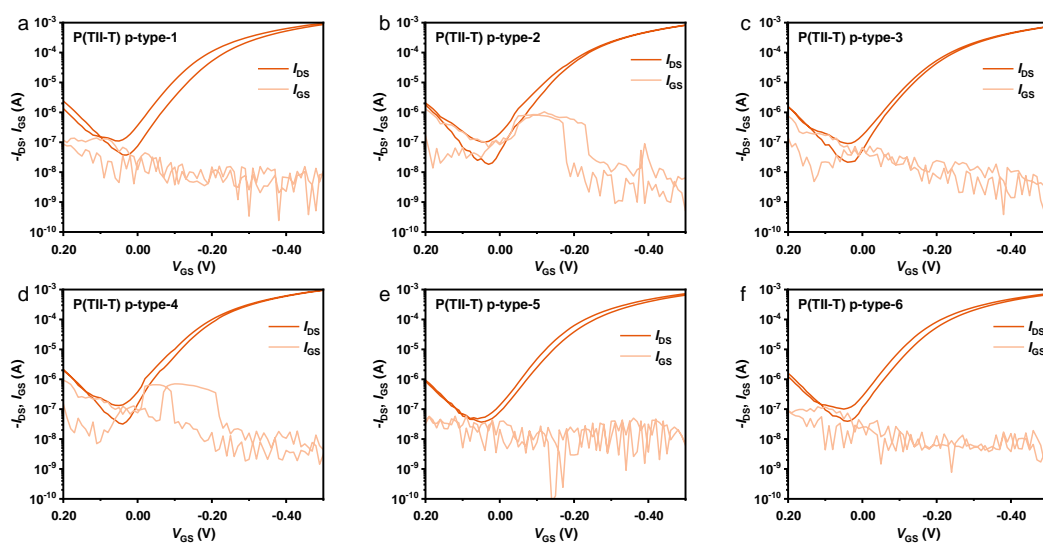

546

547 **Supplementary Fig. 24 Six typical p-type OECT transfer characteristics** based on P(TII-T)  
 548 before GPC fractionation. The dark line indicates the source-drain current, and the light line  
 549 indicates the leakage current of the gate.

550

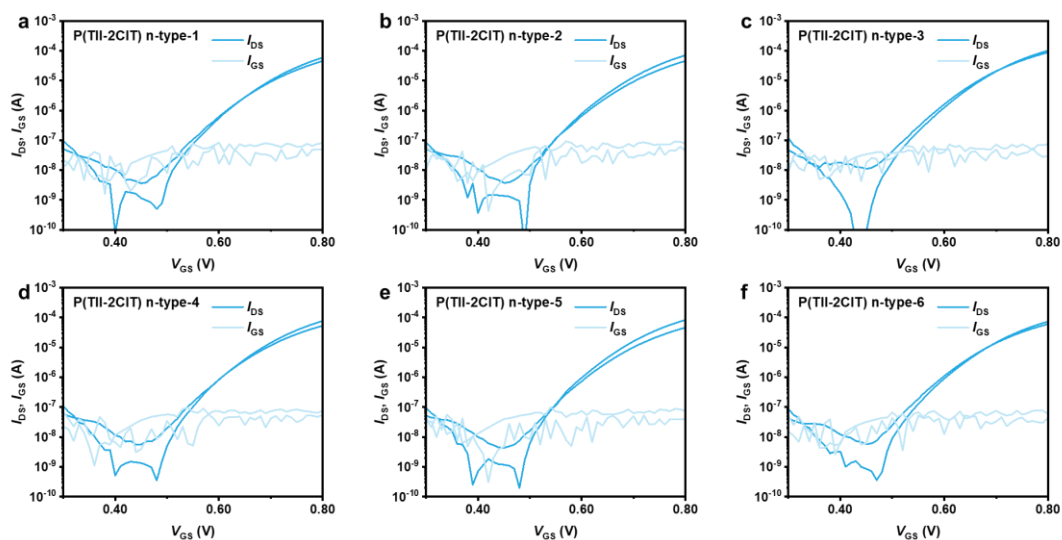

551

552 **Supplementary Fig. 25 Six typical n-type OECT transfer characteristics** based on P(TII-2CIT)  
 553 before GPC fractionation. The dark line indicates the source-drain current, and the light line  
 554 indicates the leakage current of the gate.

555

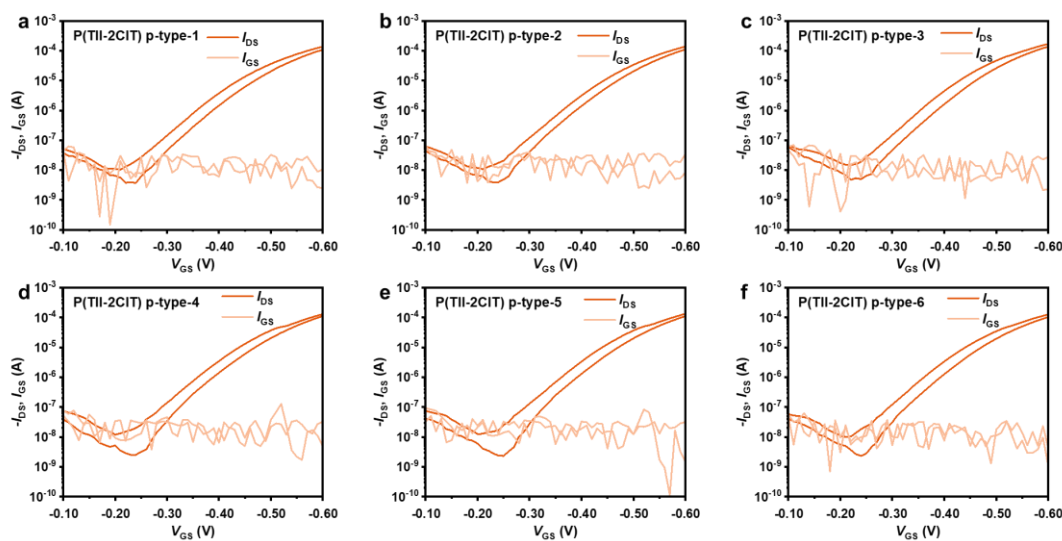

556

557 **Supplementary Fig. 26 Six typical p-type OECT transfer characteristics** based on P(TII-2CIT)  
 558 before GPC fractionation. The dark line indicates the source-drain current, and the light line  
 559 indicates the leakage current of the gate.

560



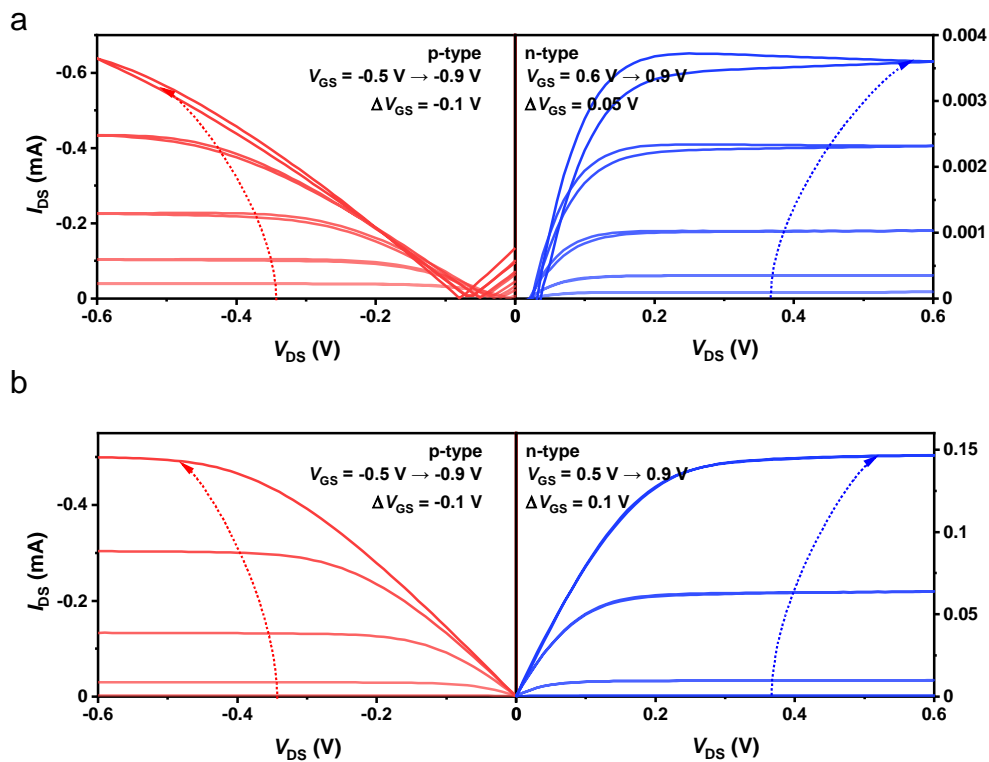

561

562 **Supplementary Fig. 27 Ambipolar OECT output characteristics before GPC fractionation. a**

563 **P(TII-T) and b P(TII-2CIT).**

564

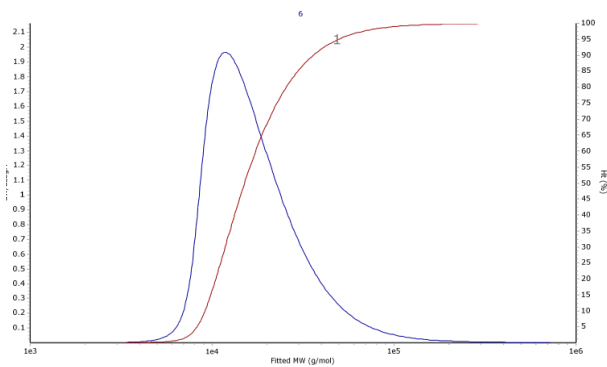

565

566 **Supplementary Fig. 28 Molecular weights and PDI of purified P(TII-2FT), measured by GPC**

567 **with hexafluoroisopropanol as the eluent.  $M_n = 14.7$  kDa;  $M_w = 20.9$  kDa; PDI = 1.42.**

568

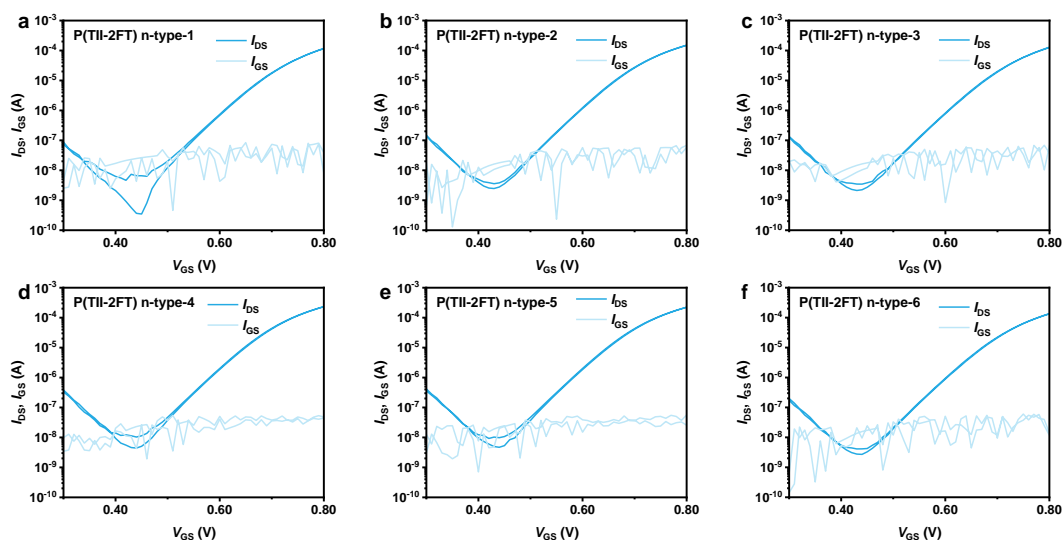

569

570 **Supplementary Fig. 29 Six typical n-type OECT transfer characteristics** based on P(TII-2FT)  
 571 after GPC fractionation. The dark line indicates the source-drain current, and the light line indicates  
 572 the leakage current of the gate.

573

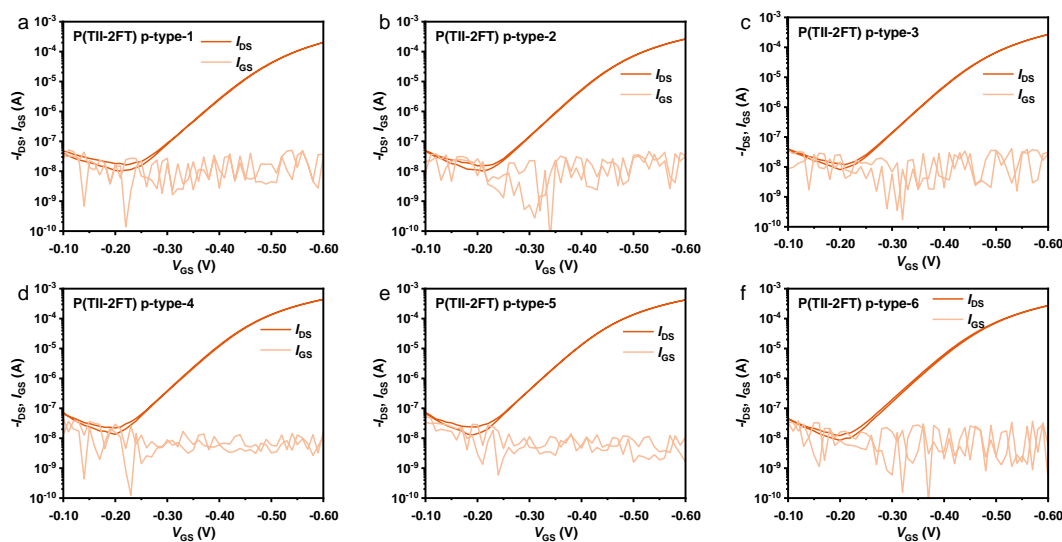

574

575 **Supplementary Fig. 30 Six typical p-type OECT transfer characteristics** based on P(TII-2FT)  
 576 after GPC fractionation. The dark line indicates the source-drain current, and the light line indicates  
 577 the leakage current of the gate.

578

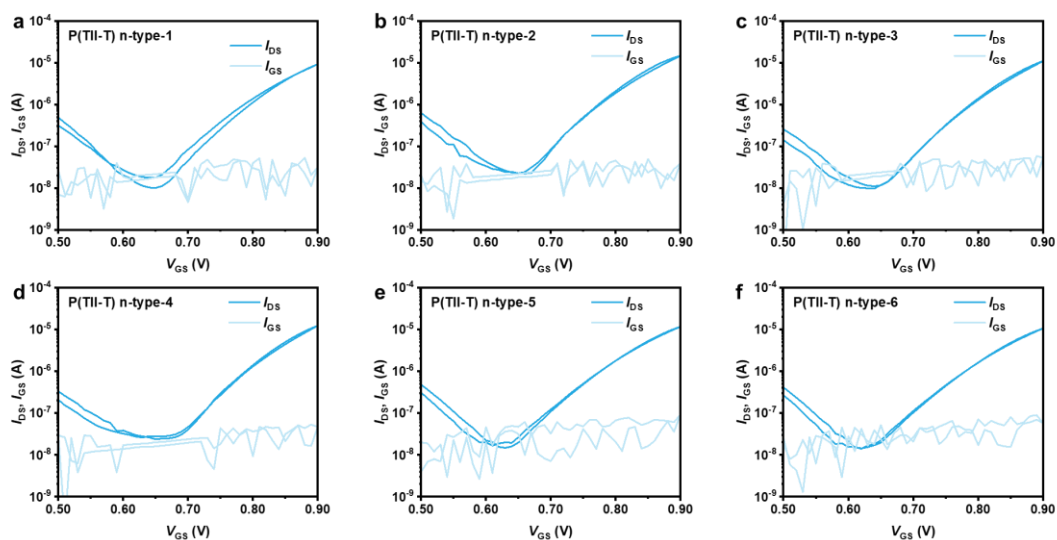

579

580 **Supplementary Fig. 31 Six typical n-type OECT transfer characteristics** based on P(TII-T) after  
 581 GPC fractionation. The dark line indicates the source-drain current, and the light line indicates the  
 582 leakage current of the gate.

583

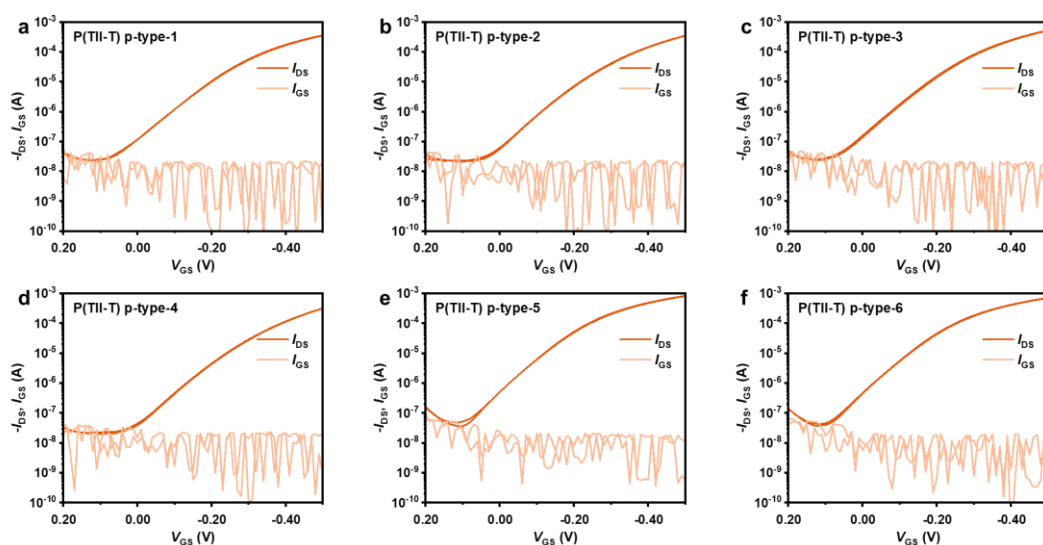

584

585 **Supplementary Fig. 32 Six typical p-type OECT transfer characteristics** based on P(TII-T) after  
 586 GPC fractionation. The dark line indicates the source-drain current, and the light line indicates the  
 587 leakage current of the gate.

588

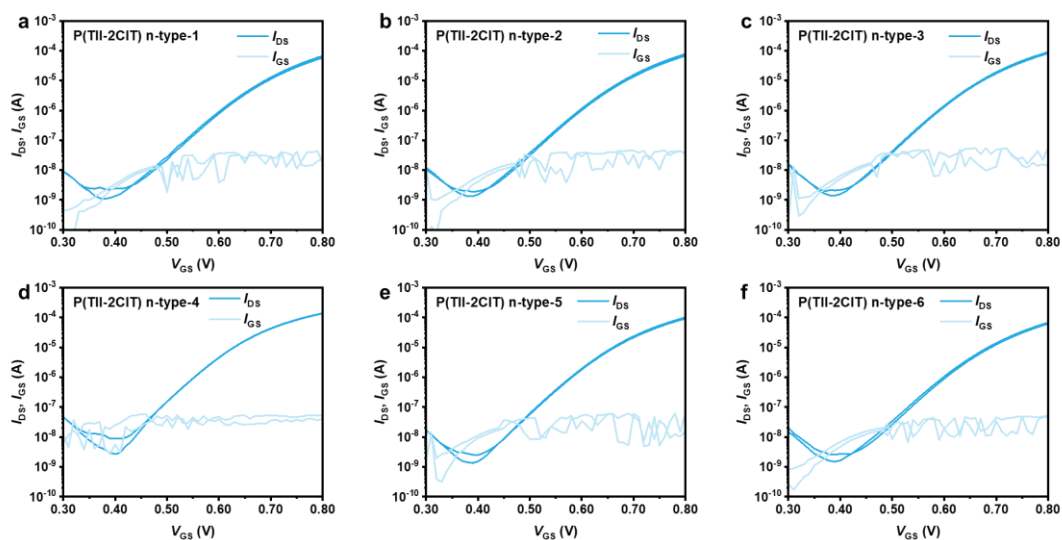

589

590 **Supplementary Fig. 33 Six typical n-type OECT transfer characteristics** based on P(TII-2CIT)  
 591 after GPC fractionation. The dark line indicates the source-drain current, and the light line indicates  
 592 the leakage current of the gate.

593

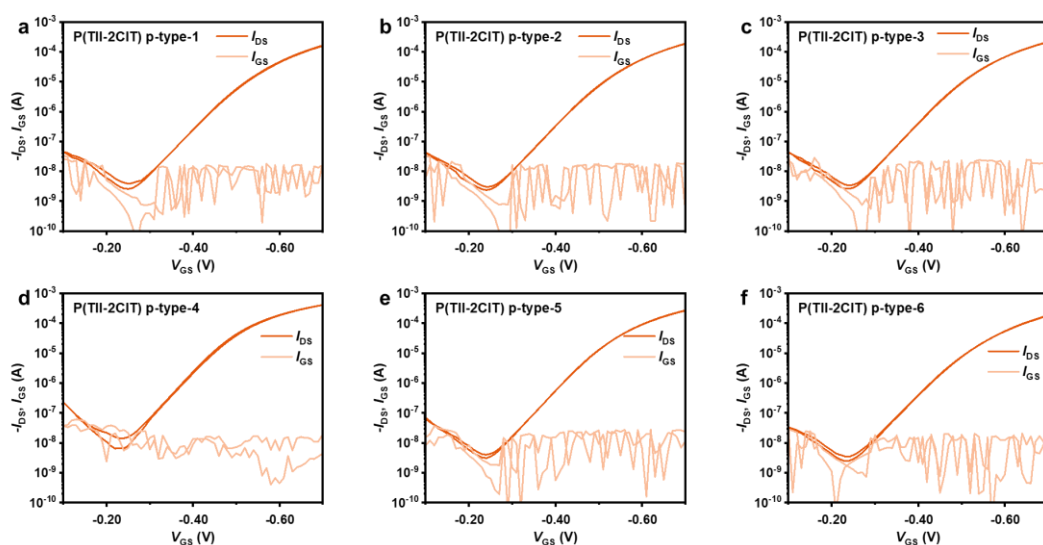

594

595 **Supplementary Fig. 34 Six typical p-type OECT transfer characteristics** based on P(TII-2CIT)  
 596 after GPC fractionation. The dark line indicates the source-drain current, and the light line indicates  
 597 the leakage current of the gate.

598

599 After examining the gate current data form all the transfer characteristics (Supplementary Fig.

600 21-26 and Supplementary Fig. 29-34), we affirm that the leakage current does not contribute to the  
 601 transfer characteristics and quality factor of the devices.

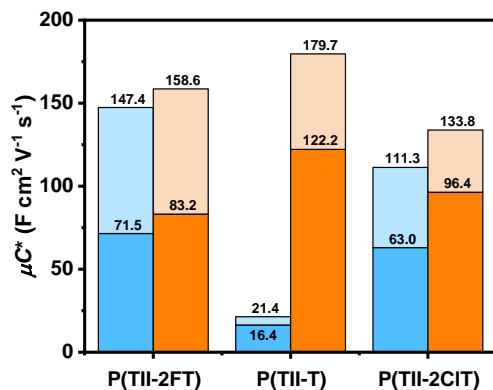

602  
 603 **Supplementary Fig. 35 Comparison of OECT performance before and after GPC**  
 604 **fractionation.** Blue and orange represent the n-type and p-type OECT performance, respectively.  
 605 Dark colors indicate original performance, while light colors indicate elevated performance after  
 606 GPC fractionation.  
 607

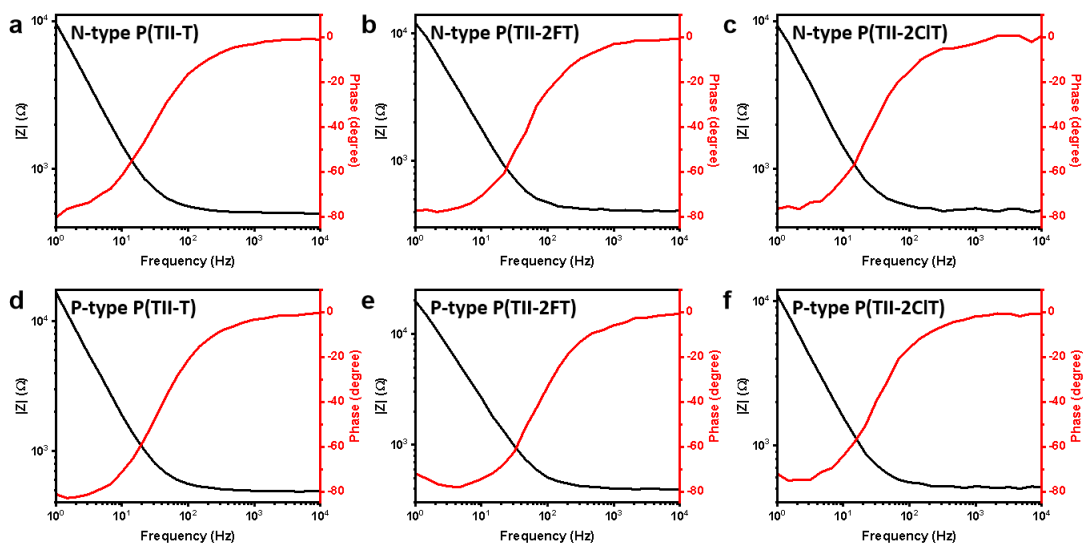

608  
 609 **Supplementary Fig. 36 Electrochemical impedance spectrum (EIS).** a/d P(TII-T), b/e P(TII-  
 610 2FT), and c/f P(TII-2CIT).  $|V_{DC}| = 0.8$  V.  
 611

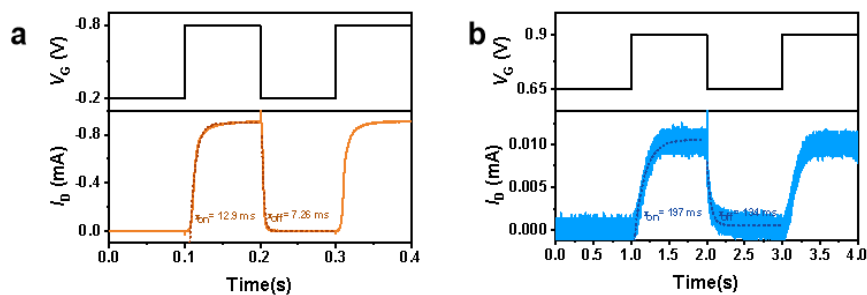

612

613 **Supplementary Fig. 37** Response time measurements for P(TII-T). **a** P-type and **b** n-type.  $|V_{DS}|$

614 = 0.6 V.

615

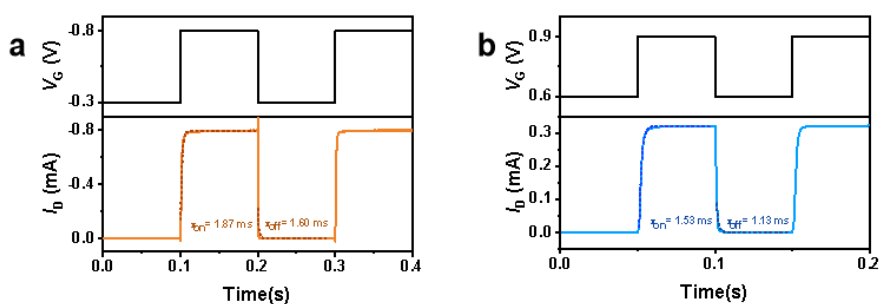

616

617 **Supplementary Fig. 38** Response time measurements for P(TII-2CIT). **a** P-type and **b** n-type.

618  $|V_{DS}| = 0.6$  V.

619

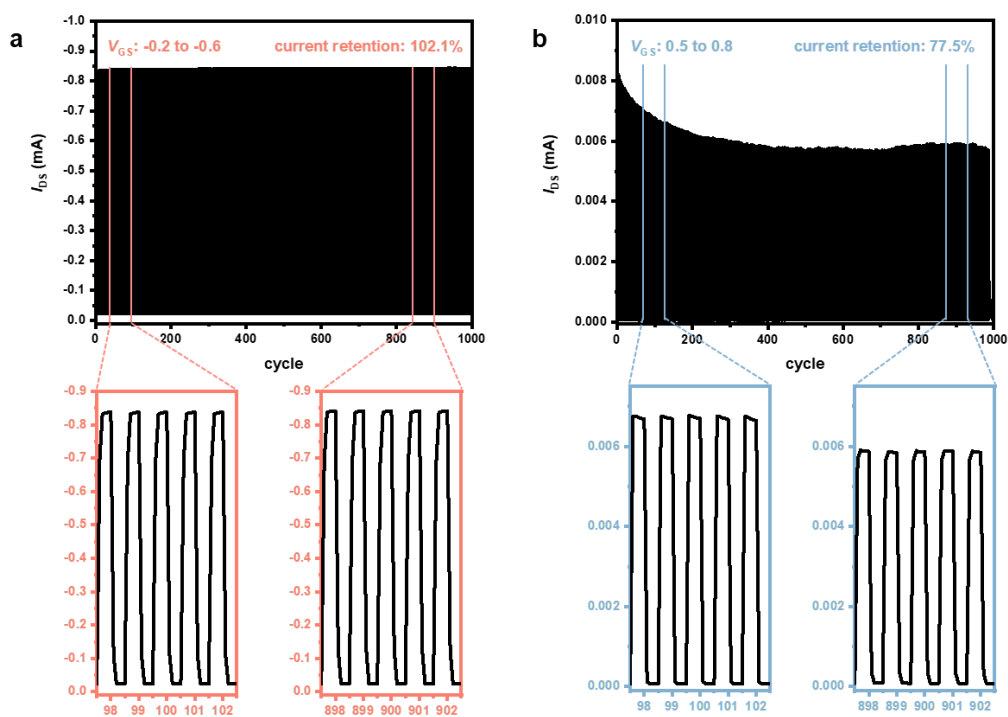

620

621 **Supplementary Fig. 39 Regime stability tests for P(TII-T). a P-type and b n-type.**  $V_{DS} = -0.6$  V.

622

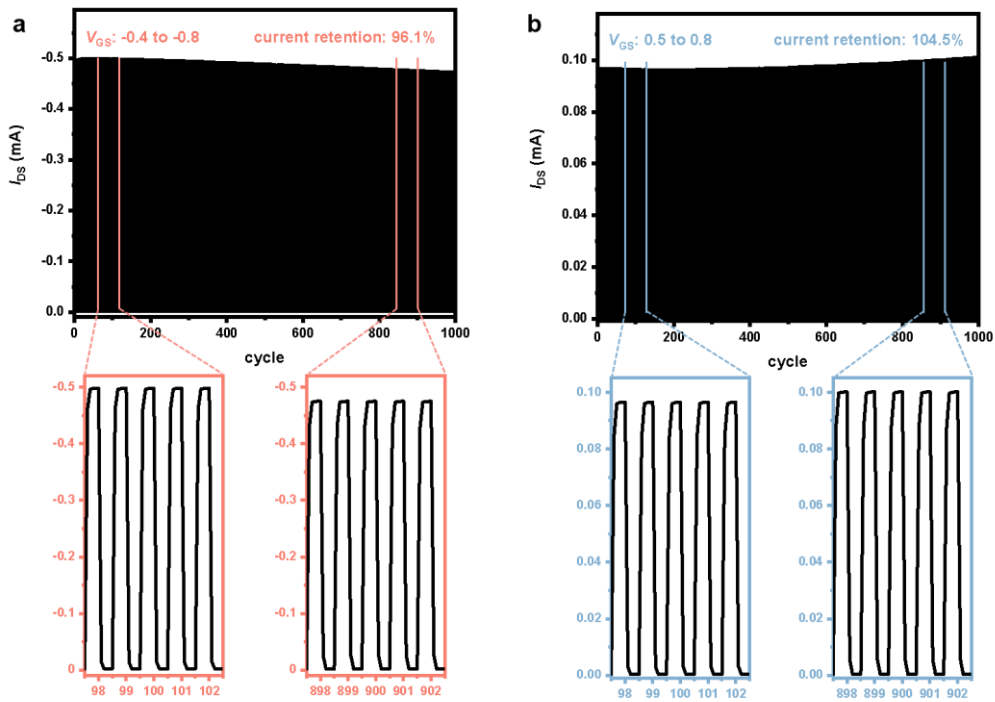

623

624 **Supplementary Fig. 40 Regime stability tests for P(TII-2FT). a P-type and b n-type.**  $V_{DS} = -0.6$

625 V.

626

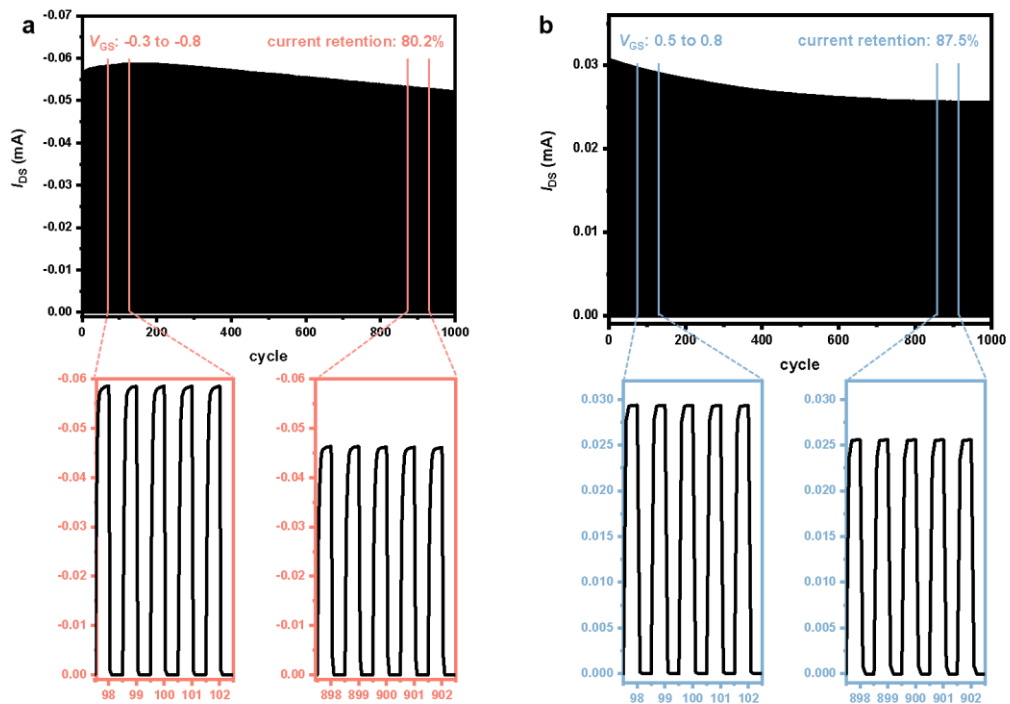

627

628 **Supplementary Fig. 41 Regime stability tests for P(TII-2CIT). a** P-type and **b** n-type.  $V_{DS} = -0.6$   
 629 V.

630

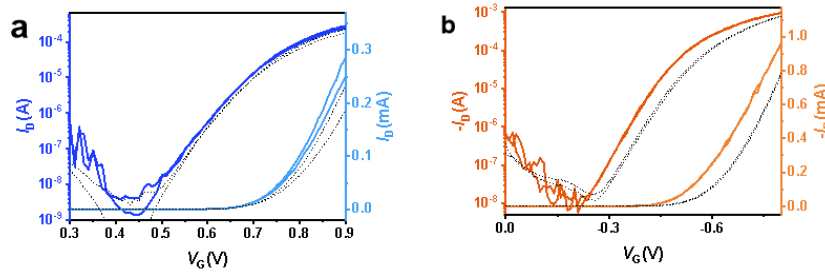

631

632 **Supplementary Fig. 42 Transfer characteristics based on TII-2FT. a** N-type and **b** p-type. The  
 633 black dotted lines represent the transfer characteristics of the device exposed to undried air for 81  
 634 days, while the colorful lines represent the original transfer characteristics for comparison.

635

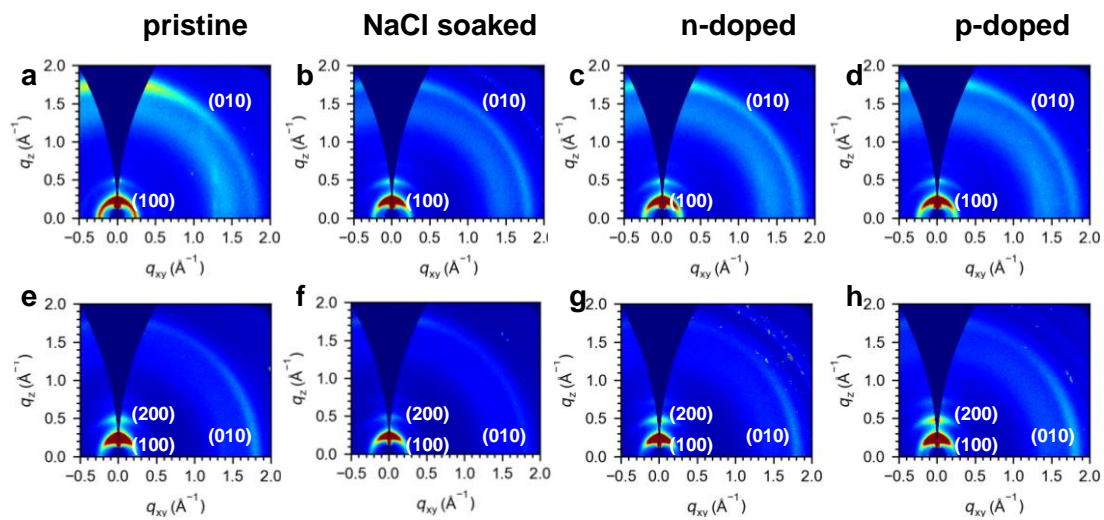

636

637 **Supplementary Fig. 43 2D-GIWAXS patterns of P(TII-T)/P(TII-2FT) films. a/e** Pristine, **b/f**  
 638 immersed in a 0.1 M NaCl solution, **c/g** n-doped, and **d/h** p-doped processes. The p-doped/n-doped  
 639 processes stand for the films on the silicon substrate that are oxidized/reduced by the 0.8/-0.8 V  
 640 voltage bias for 10 min.

641

642 Pristine P(TII-2FT) and P(TII-2CIT) films exhibit strong (010) diffractions in the  $q_{xy}$   
 643 orientation and (100) diffractions in the  $q_z$  orientation, indicating a dominant edge-on packing in the  
 644 film (Supplementary Fig. 43e and Supplementary Fig. 46a). Conversely, the P(TII-T) film displays  
 645 circular (100) and (010) diffraction signals ranging from  $q_z$  to  $q_{xy}$  orientation, indicating the  
 646 coexistence of both edge-on and face-on packing (Supplementary Fig. 43a). Upon immersion in a  
 647 0.1 M NaCl solution, both P(TII-2FT) and P(TII-T) films in the (100) and (010) orientations display



648 decreased crystallinity compared to their pristine films (Supplementary Fig. 43b, f), corroborated  
 649 by the reduction in their corresponding coherence lengths (CLs) (Supplementary Fig. 44 and  
 650 Supplementary Table 8). When p-doped or n-doped, P(TII-T) films exhibit further diminished  
 651 crystallinity, while those of P(TII-2FT) films display slightly enhanced crystallinity. These trends  
 652 are also observed in AFM height images. Pristine P(TII-2FT) and P(TII-2CIT) films possess smooth  
 653 surfaces with fiber-like textures (Supplementary Fig. 45e and Supplementary Fig. 46c), and the root-  
 654 mean-square (RMS) roughness of P(TII-2FT) films subjected to p-doped/n-doped processes is  
 655 slightly higher than that of the pristine films (Supplementary Fig. 45g, h), suggesting a stronger  
 656 crystallization feature after doping. However, the RMS roughness of the doped P(TII-T) films  
 657 displays an opposite trend (Supplementary Fig. 45c, d). Better crystallinity and minimal morphology  
 658 change might explain the high charge carrier mobility and good stability of P(TII-2FT) after doping.  
 659

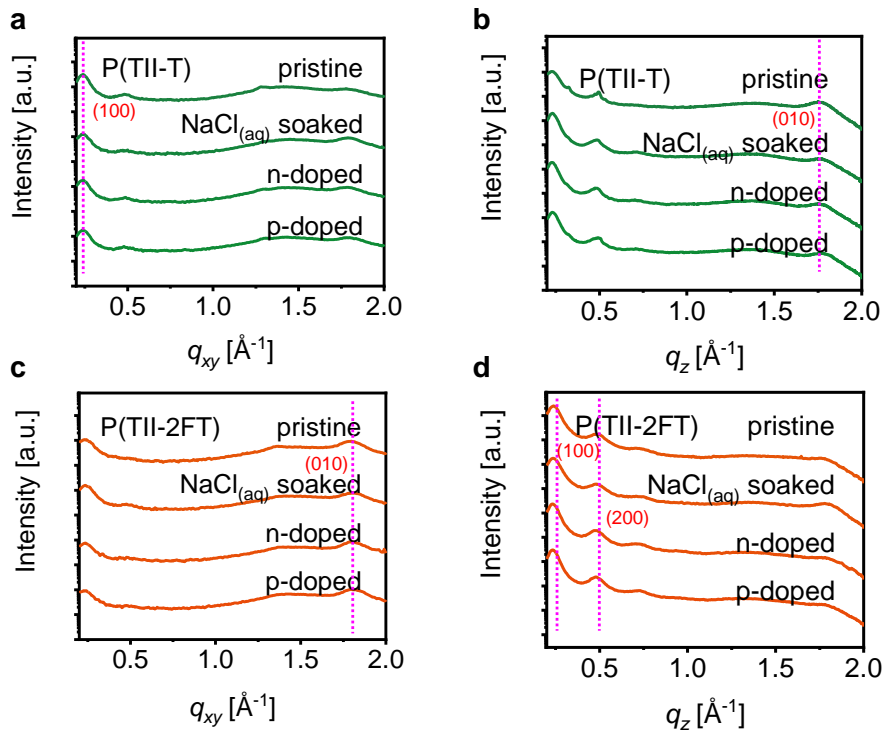

660  
 661 **Supplementary Fig. 44 The  $q_{xy}$  orientation (in plane) line-cuts and  $q_z$  orientation (out of plane)**  
 662 **line-cuts. a & b P(TII-T) and c & d P(TII-2FT), with the different treated processes.**  
 663

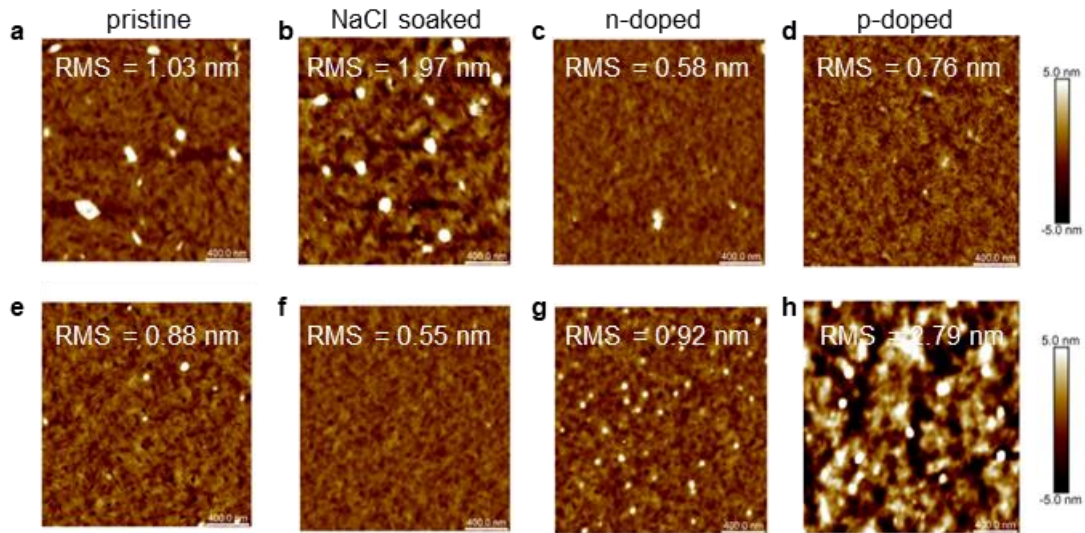

664  
665  
666  
667  
668

**Supplementary Fig. 45 AFM height images of P(TII-T)/P(TII-2FT) films.** a/e Pristine, b/f immersed in a 0.1 M NaCl solution, c/g n-doped, and d/h p-doped. The p-doped/n-doped stand for the films on the silicon substrate that are oxidized/reduced by a 0.8/-0.8 V voltage bias for 10 min.

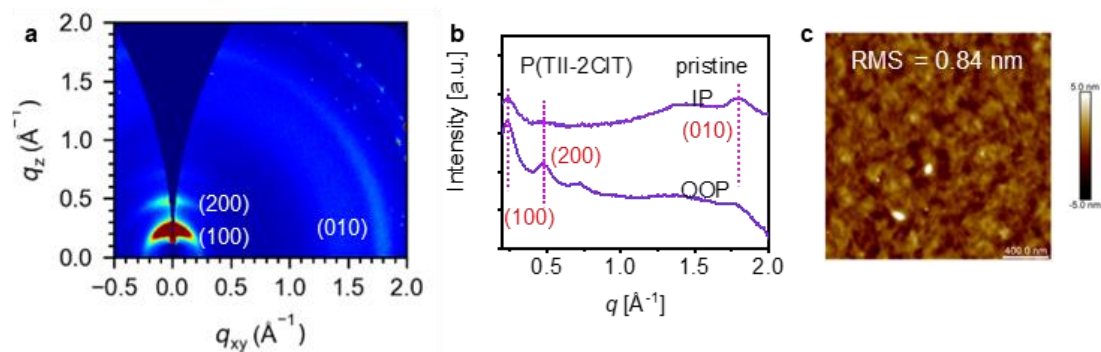

669  
670  
671  
672  
673

**Supplementary Fig. 46 The morphology of pristine P(TII-2CIT) film.** a 2D-GIWAXS pattern, b 1D-GIWAXS line-cuts, and c AFM height image. In plane (IP) stands the  $q_{xy}$  orientation, and out of plane (OOP) stands the  $q_z$  orientation.

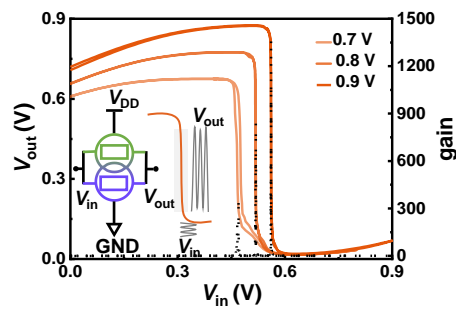

674  
675  
676

**Supplementary Fig. 47 A representative voltage transfer characteristic** of the inverter based on P(TII-2FT) at supply voltages, and the associated voltage gains.

677

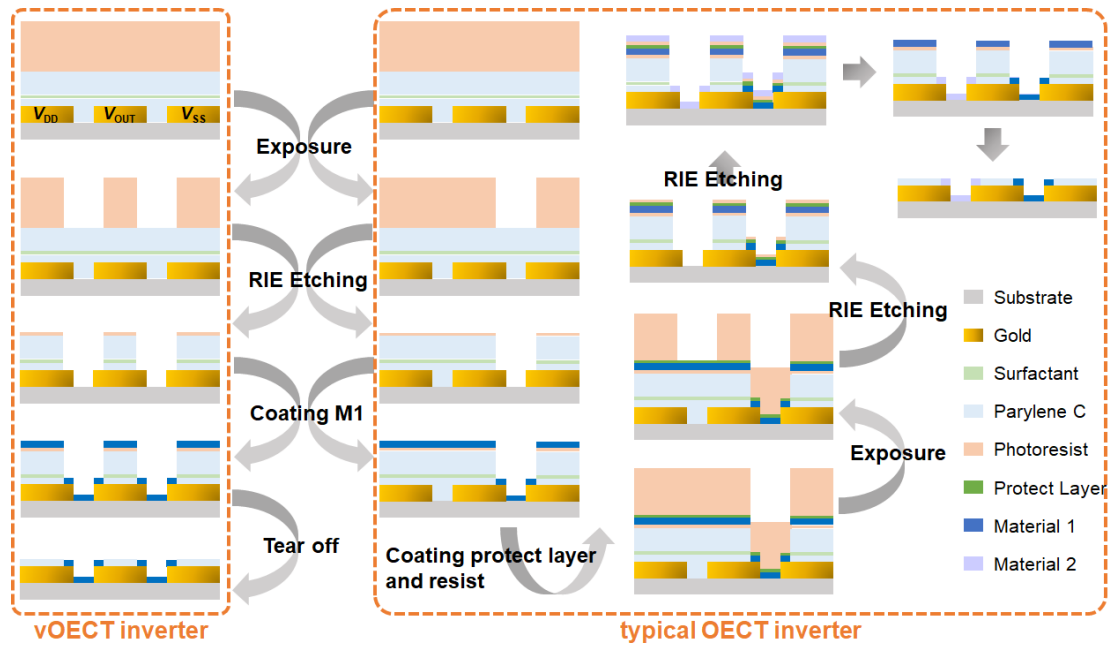

678

679 **Supplementary Fig. 48 Comparison of the device fabrication processes** between vertical OEET  
680 inverters based on ambipolar materials and traditional OEET inverters based on complementary p-  
681 type and n-type materials.

682

683 Regarding the advantages of ambipolar OEETs in simplifying the manufacturing process, we  
684 illustrate this in Supplementary Fig. 48. Compared to traditional OEET device structures, the  
685 ambipolar vertical OEET device structure simplifies the process from the original 9 steps (including  
686 two photolithography and two etching processes) to 4 steps (requiring only one photolithography  
687 and one etching). Additionally, the balanced ambipolar OEET performance enables the fabrication  
688 of inverters without adjusting the channel dimensions, which is generally necessary in CMOS-like  
689 device fabrication. This highlights the significant advantage of the ambipolar vertical OEET device  
690 structure in simplifying the manufacturing process.

691

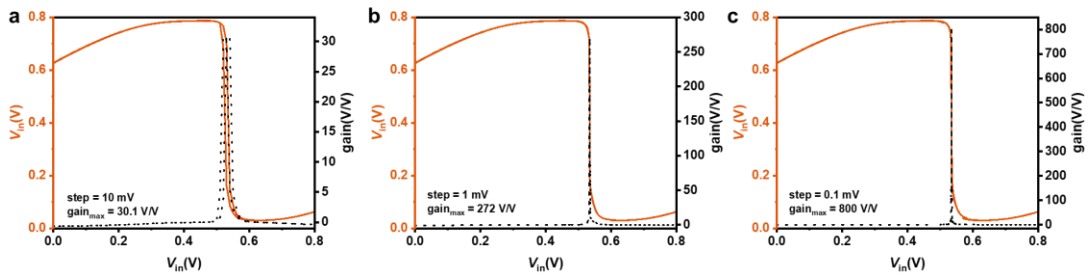

692

693 **Supplementary Fig 49 The variation of the gains with voltage step size based on a P(TII-2FT)**  
 694 **inverter. a 10 mV, b 1 mV, c 0.1 mV.** Notably, the theoretical maximum gains measurable at 10 mV,  
 695 1 mV, and 0.1 mV are 40 V/V, 400 V/V, and 4000 V/V, respectively. It can be observed that the  
 696 experimental gain values obtained under the testing conditions of 10 mV and 1 mV closely approach  
 697 these theoretical values.

698

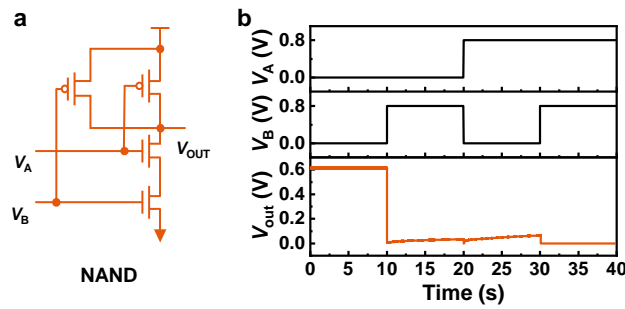

699

700 **Supplementary Fig. 50 Circuit diagram and voltage input and output behavior given by the a**  
 701 **& b NAND gate based on P(TII-2FT).**

702

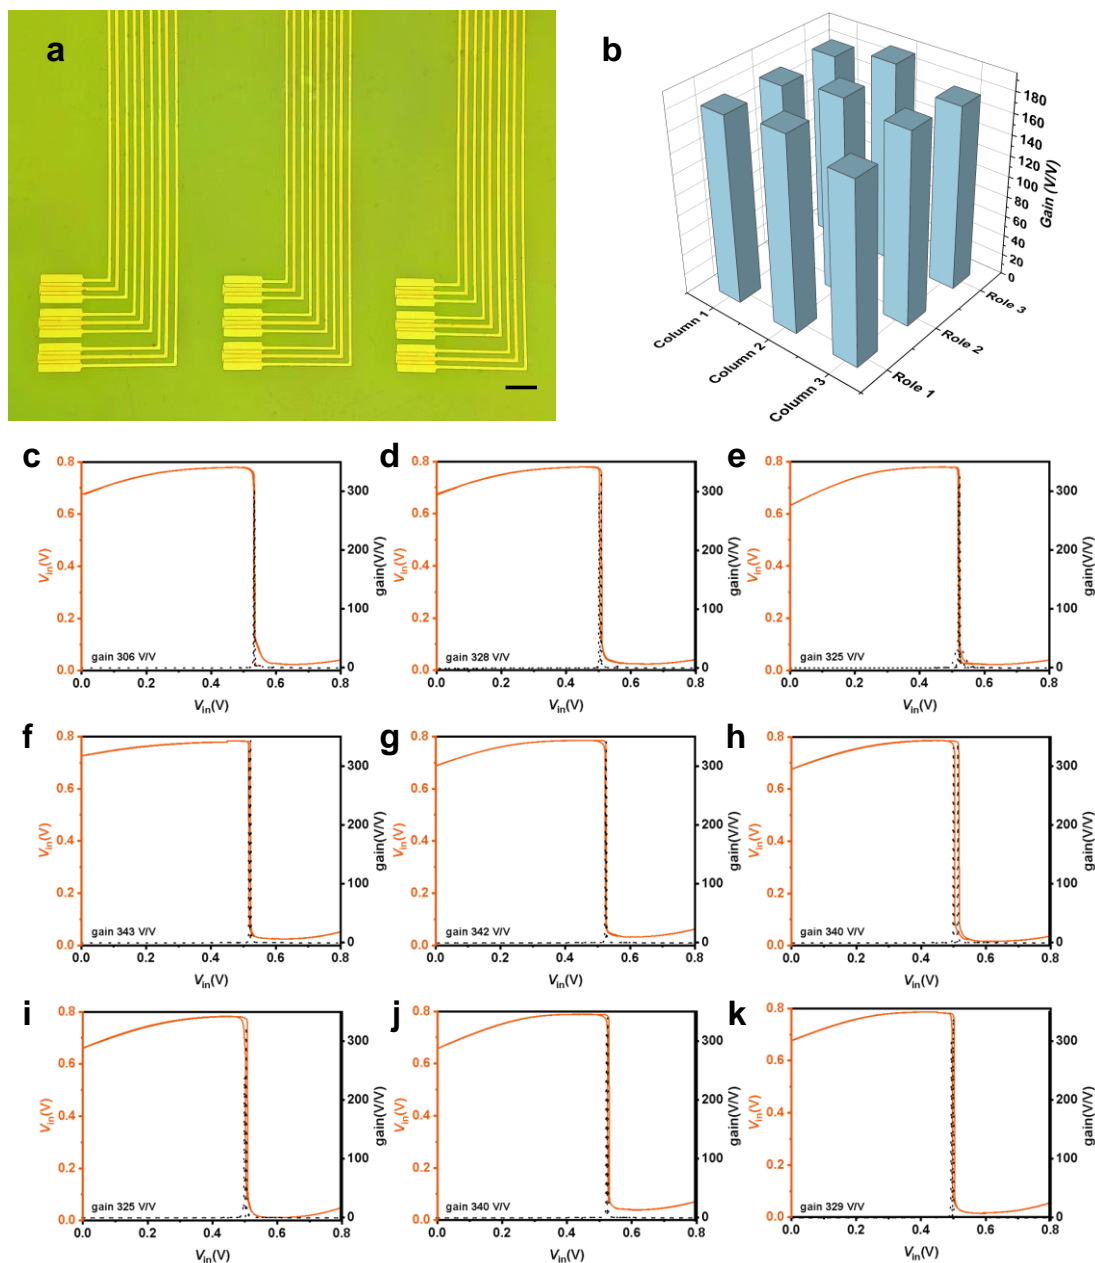

703

704 **Supplementary Fig. 51 The flexible inverter array and repetitive inverter performance based**  
 705 **on P(TII-2FT). a** Fabricated 3×3 array for testing (scale bar: 100 μm). **b** Gain of the 3×3 vOECT  
 706 inverter array based on P(TII-2FT). All the inverters show very similar device performance. **c-k** The  
 707 gains of 3x3 inverter arrays based on P(TII-2FT) while  $V_{DD} = 0.8$  V ( $\Delta V_{IN} = 1$  mV).

708

709 We successfully fabricated inverter arrays using our ambipolar material, P(TII-2FT). To  
 710 maximize potential array density, we omitted the wiring of transistors in the array (Fig. 4k, 4l), as  
 711 they can be connected from the other layer via through-holes (*Science* 373, 88-94 (2021)). Assuming

712 a critical dimension of 10  $\mu\text{m}$  for flexible electronics, we fabricated a flexible array of 300 $\times$ 300  
713 vertical OECT inverters within an area of 12 mm  $\times$  9.6 mm, demonstrating an array density of  
714 78,125 cm<sup>2</sup> for the first time. In comparison, under the same lithography precision and channel  
715 aspect ratio ( $W/L = 100$ ), the array density of traditional OECT inverters is only 1,650 cm<sup>2</sup>, about  
716 1/50<sup>th</sup> of the vertical OECT inverter array density. This significant difference demonstrates the  
717 immense application value of vertical OECT devices constructed with balanced, high-performance,  
718 and stable ambipolar OECT materials in enhancing device integration and reducing space  
719 occupation.

720 Furthermore, we would like to emphasize again that achieving high integration, small  
721 footprints, and simplified manufacturing processes is not solely dependent on the ambipolar vertical  
722 OECT device structure; it is also closely related to the high-performance, balanced, and stable  
723 ambipolar polymer P(TII-2FT). As noted by Rashid et al., the interest in vertical OECT research  
724 lies not only in designing smaller device sizes but also in achieving higher transconductance and  
725 cutoff frequencies within the same area (*Adv. Mater.* 30, 1705031 (2018); *Sci. Adv.* 7, eabh1055  
726 (2021)). However, the generally low device performance and poor stability of currently reported  
727 ambipolar OECT materials are implementation barriers. Our proposed high-spin structure design  
728 strategy and the resulting high-performance, stable, and balanced ambipolar OECT materials  
729 address these bottleneck issues and provide a feasible path to vertical OECT devices for on-site  
730 amplification of biological signals.

731 To further illustrate the operability of our design strategy in enhancing device integration and  
732 reducing footprints, we fabricated a 3 $\times$ 3 inverter array based on the vertical OECT structure  
733 (Supplementary Fig. 51). This 3 $\times$ 3 inverter array demonstrated a gain of  $184.5 \pm 6.0$  V/V with a test  
734 step size of 1 mV, exhibiting excellent performance and consistency. By further reducing the test  
735 step size to 0.1 mV, the device achieved a gain of 607.9 V/V. This slow scan rate greatly extends the  
736 testing time, generally requiring the material to have very good operational stability, a condition  
737 under which most reported materials struggle to remain stable. Using the vertical OECT device  
738 structure, Rashid et al. achieved a peak inverter gain of 28 V/V and an ECG signal amplification of  
739 10 times with a 10 mV step size (*Sci. Adv.* 7, eabh1055 (2021)). In contrast, we achieved a peak

740 inverter gain of 809 V/V and an ECG signal amplification of 73 times with a 0.1 mV step size. This  
 741 significant difference further demonstrates the advantage of our polymer design strategy in  
 742 improving device gain and enhancing device stability, directly addressing the bottleneck issues of  
 743 vertical OECT devices in practical applications.

744

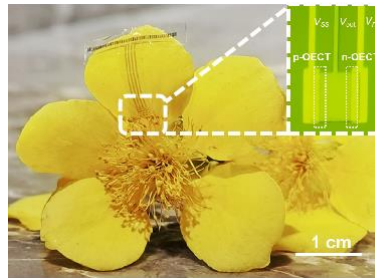

745

746 **Supplementary Fig. 52 Photograph and magnified microscope image of the thin and flexible**  
 747 **inverters.** Attached to a fragile petal.

748

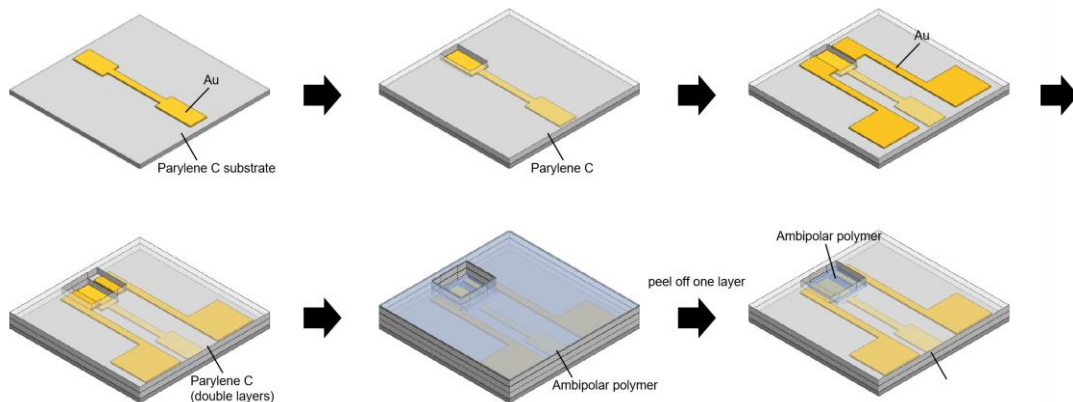

749

750 **Supplementary Fig. 53 Schematic illustration of the fabrication process of the flexible**  
 751 **amplifiers.** Used for EEG, ECG, and ECoG signal recording.

752

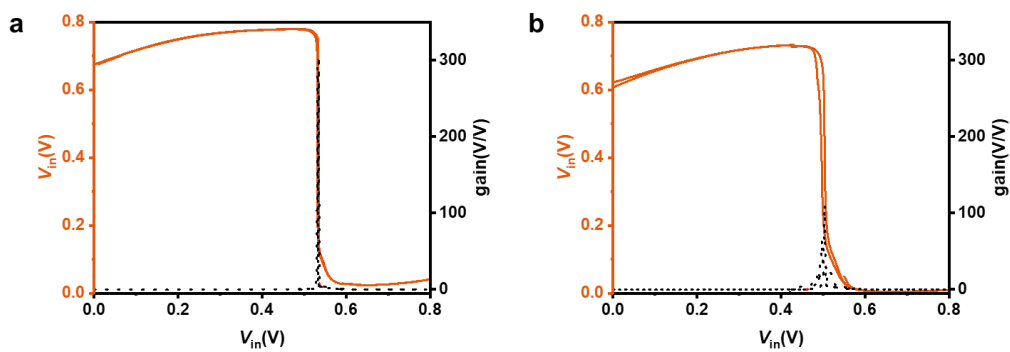

753

754 **Supplementary Fig. 54 Representative voltage transfer characteristics of the inverter based on**  
 755 **P(THI-2FT) in a 0.1 M NaCl solution and b in artificial cerebrospinal fluid (ACSF).**

756

757 We prepared artificial cerebrospinal fluid (ACSF) with ion concentrations, pH value, and  
758 osmotic pressure similar to animal cerebrospinal fluid. The formulation included NaCl (147 mM),  
759 KCl (3.5 mM), NaH<sub>2</sub>PO<sub>4</sub> (1 mM), NaHCO<sub>3</sub> (2.5 mM), glucose (11 mM), and freshly added  
760 suspensions of Ca(OH)<sub>2</sub> and Mg(OH)<sub>2</sub> to adjust the concentrations of Ca<sup>2+</sup> (1 mM) and Mg<sup>2+</sup> (1.2  
761 mM). We tested the OECT devices in ACSF and observed a decrease in gain similar to that seen in  
762 brain tissue fluid, even under quasi-static testing conditions (Supplementary Fig. 54). The inverter  
763 we utilized exhibited a gain of 306 in a 0.1 M NaCl solution but dropped to only 111 in ACSF (with  
764 a testing step size of 1 mV), representing a decrease of 64%. Note that mouse cerebrospinal fluid  
765 contains various proteins, and this complex environment may interfere with signal capture and  
766 amplification. Therefore, for biosignal capture, factors such as solution environment and response  
767 speed (Fig. 5c) should also be considered critical to device performance.

768 Although the amplification factor for detecting electrocorticography (ECoG) signals in the rat  
769 brain was average, the record-high quasi-static gain of 809 based on our amplifier is still meaningful  
770 for practical applications, especially for biological signal amplification. High-gain devices are  
771 advantageous for amplifying very small biological signals. For example, biosignals from the brain  
772 include many small signals, such as local field potential (LFP, 100-500 μV), electroencephalogram  
773 (EEG, 5-300 μV), and electrocorticogram (ECoG, 50-500 μV) (*Principles of Neural Science*, New  
774 York: McGraw-Hill Health Professions Division, 2000).

775 In quasi-static testing, the test step size plays a crucial role. Simple mathematical calculations  
776 reveal that with a step size of 10 mV, the theoretical upper limit of the inverter gain with a  $V_{DD}$  of  
777 0.8 V is  $0.8 \text{ V} / (0.01 \text{ V} \times 2) = 40$ . This value increases to 400 and 4000 at step sizes of 1 mV and  
778 0.1 mV, respectively. For LFP measurement, the amplitude is small, usually 0.1-0.5 mV. Thus,  
779 choosing 0.1 mV as the step size is meaningful. In our device, we obtained a gain of 809 at a step  
780 size of 0.1 mV, which is still lower than the theoretical value (4000). However, with a larger step  
781 size, the inversion point cannot be found precisely, and we cannot accurately measure the real gain  
782 values for small signals, such as LFP. Therefore, to fully characterize the capability of an inverter,  
783 quasi-static gain measurement is necessary.

784 From the gain curve, higher gains correspond to larger magnification and smaller detection  
785 ranges. This is why we stress that high-gain devices are advantageous in small signal sensing. This



786 also raises another issue: according to the calculations above, even if the influence of signal  
787 frequency is ignored, signals such as electrocardiogram (ECG) signals, which exceed 1 mV, may  
788 not fully utilize the quasi-static gain. However, obtaining a 73-fold increase in the ECG signal, as  
789 achieved in our work, amplifies a 1 mV signal to 73 mV, which is already a very good amplification  
790 value. Therefore, this gain can be considered successful, even though it did not reach the maximum  
791 value of 809 V/V. Based on our tests with a 1 mV step, the gain exceeded 200 V/V, and considering  
792 the influence of signal frequency on the gain, this result is quite significant.

793 In the sensing test shown in Fig. 5e-f, we achieved a lower gain. Throughout long-term  
794 experiments, we observed a significant impact of input signal frequency on gain. As depicted in Fig.  
795 5c, a continuous increase in frequency diminishes the gain of the inverter. However, this  
796 phenomenon is not exclusive to OECTs; it is present in many other types of transistors, including  
797 well-established inorganic transistors (*Microelectron. Eng.* 216, 111054 (2019); *Adv. Funct. Mater.*  
798 32, 2205129 (2022); *npj Flexible Electron.* 7, 38 (2023)). Quasi-static gain is a foundation, and  
799 during testing, we observed that the actual signal magnification is also larger. This observation is  
800 confirmed by other works. For example, a quasi-static gain of over 700 yields 50 times ECG signal  
801 amplification (*Adv. Funct. Mater.* 32, 2205129 (2021)). As a reference, we obtained a 73-fold  
802 magnification with an 809 quasi-static gain. A quasi-static gain of 28 results in a 10-fold ECG signal  
803 amplification (*Sci. Adv.* 7, eabh1055 (2021)). Notably, they used a 10 mV step size. However, we  
804 think that they should measure their device at a smaller step size to more accurately evaluate their  
805 inverter performance.

806 We would like to point out that some papers did not report quasi-static gains because their  
807 devices may not be stable enough. Quasi-static testing with small steps can serve as an important  
808 indicator of inverter stability. In inverter testing, we must use small step testing to accurately  
809 estimate the amplification capability of an inverter for small signals. In various practical  
810 measurements based on complementary logic circuits, we observed that when the stability of OECT  
811 devices is poor, it is difficult to complete quasi-static testing with small steps, since the quasi-static  
812 measurement requires a considerable amount of time. In biological signal amplification, the stability  
813 of an amplifier is crucial, as it directly determines the lifespan of the amplifier and the reliability of  
814 data acquisition.

815 In summary, the quasi-static gain is important for biological signal amplification for the

816 following reasons:

817 (1) The value of the quasi-static gain can be used to determine the suitable operating scenarios  
818 for an inverter. Smaller measurement steps indicate the amplification capability for small signals.

819 For brain signals, our measurement step of 0.1 mV is meaningful.

820 (2) Quasi-static gain can serve as an upper limit for actual amplification performance. The gain  
821 decrease at high scan frequencies and other environmental factors is also based on the quasi-static  
822 gain.

823 (3) The quasi-static gain also reflects the overall operational stability of an inverter.

824

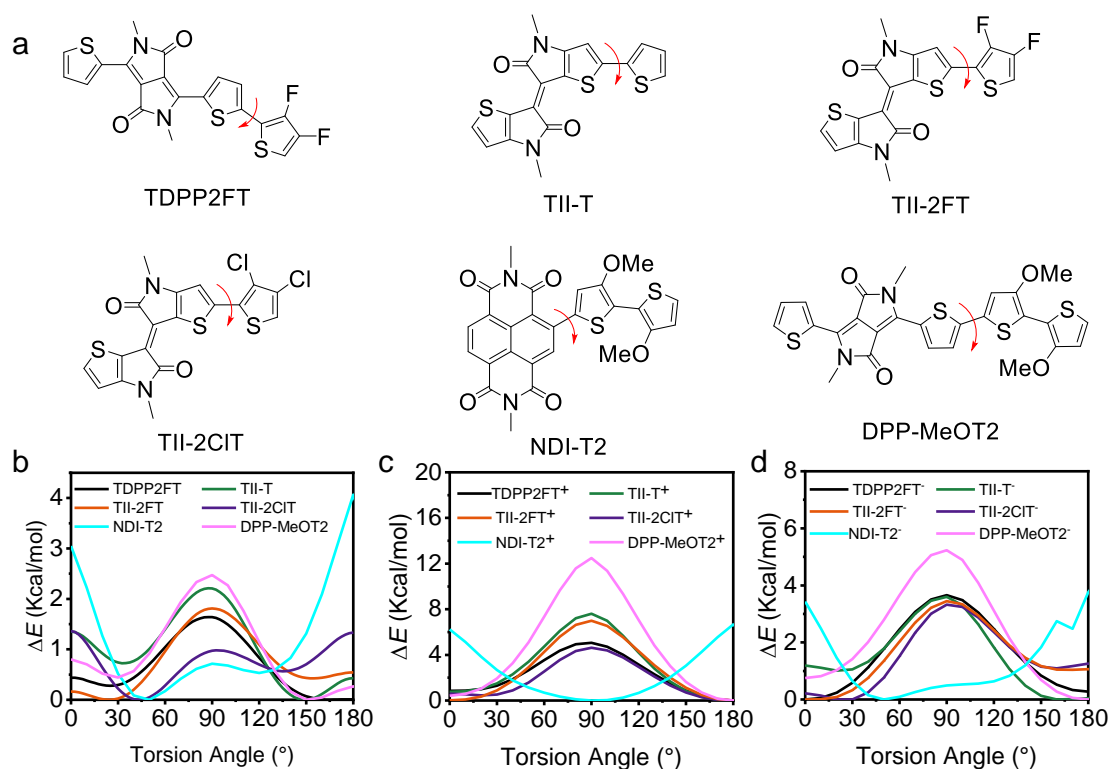

825

826 **Supplementary Fig. 55. Relaxed PES scans.** a Chemical structures of the six monomers:  
827 TDPP2FT, TII-T, TII-2FT, TII-2CIT, NDI-T2, and DPP-MeOT2. Comparison of the relaxed PES  
828 scans of the torsion angles for the monomers under b neutral, c positively, and d negatively charged  
829 states. The torsion angles are the dihedral angles marked in Supplementary Fig. 55a. The EG side  
830 chains were replaced with methyl groups to simplify the calculation.

831

832 The dominant conformation of the monomers TDPP2FT, TII-T, TII-2FT, TII-2CIT, and DPP-  
833 MeOT2 in the positively and negatively charged states shows good planarity, whereas NDI-T2  
834 displays a twisted backbone, particularly in the positively charged state.

835

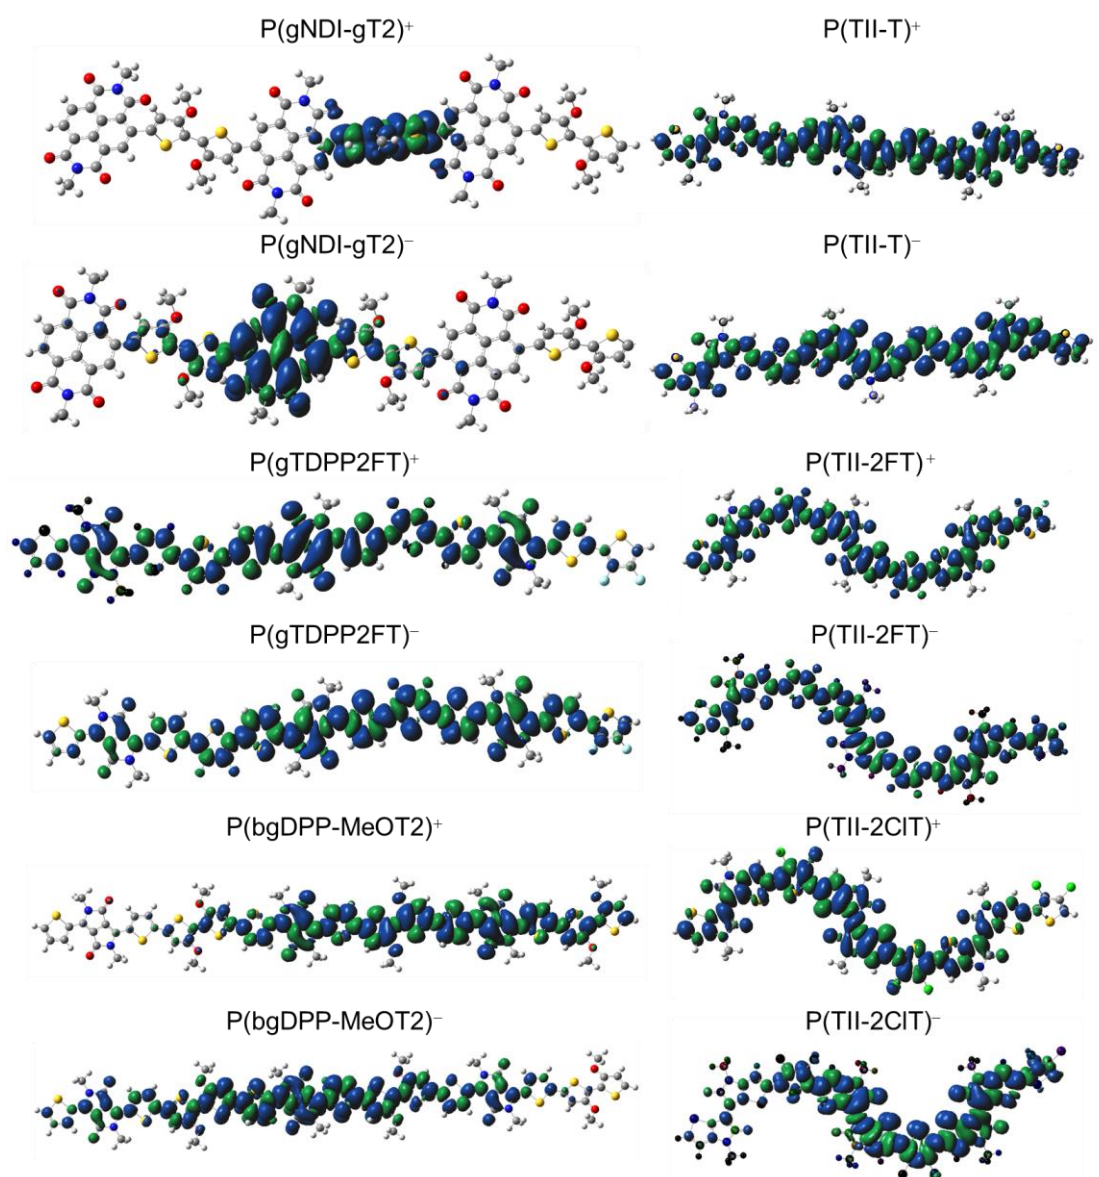

836

837 **Supplementary Fig. 56 Spin density distribution of positively or negatively charged trimers.**

838 P(gNDI-gT2), P(gTDPP2FT), P(bgDPP-MeOT2), P(TII-T), P(TII-2FT), and P(TII-2CIT).

839

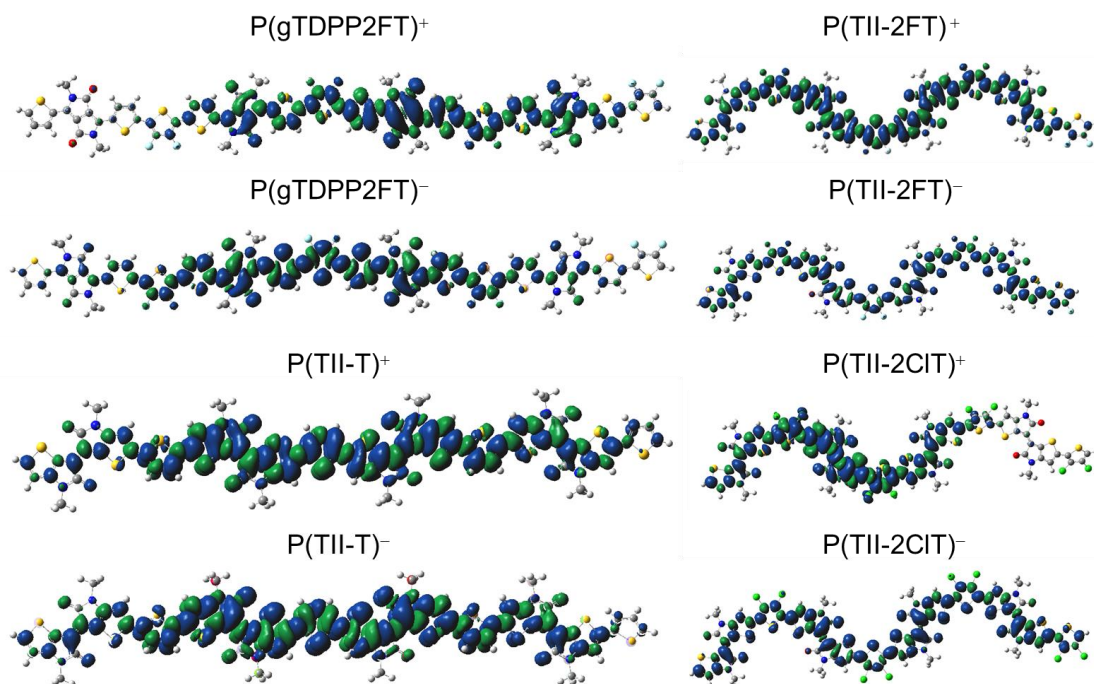

840

841 **Supplementary Fig. 57 Spin density distribution of positively or negatively charged tetramers.**

842 P(gTDPP2FT), P(TII-T), P(TII-2FT), and P(TII-2CIT).

843

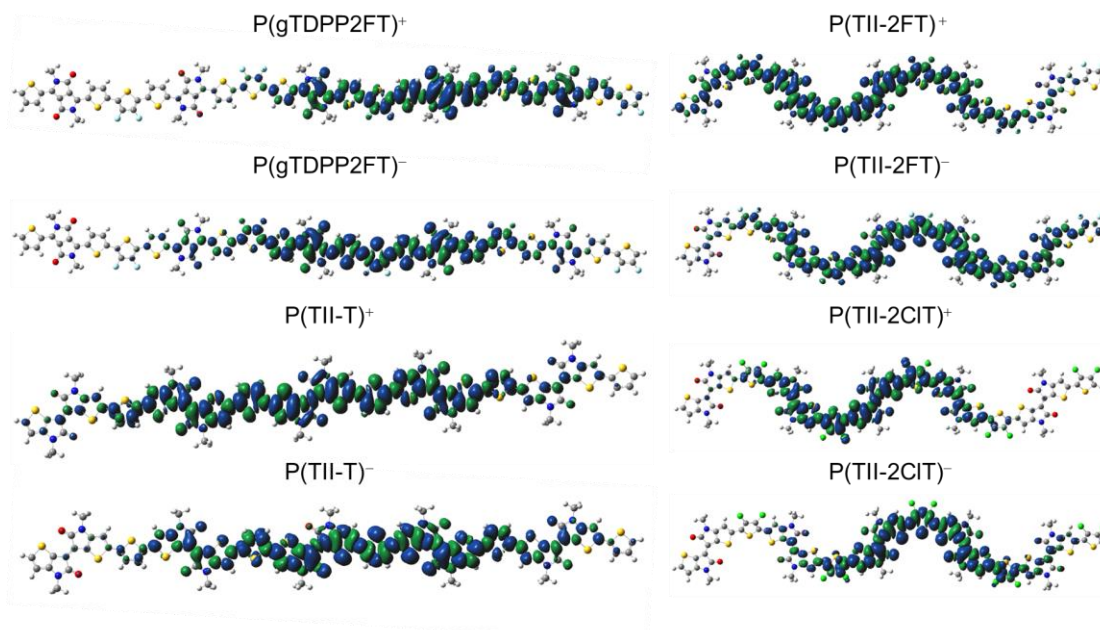

844

845 **Supplementary Fig. 58 Spin density distribution of positively or negatively charged pentamers.**

846 P(gTDPP2FT), P(TII-T), P(TII-2FT), and P(TII-2CIT).

847

848 In positively or negatively charged trimers, P(gTDPP2FT), P(TII-T), P(TII-2FT), and P(TII-

849 2CIT) all demonstrate excellent delocalization characteristics (Supplementary Fig. 56). However, in

850 P(bgDPP-MeOT2) and P(gNDI-gT2), the positive or negative charges cannot fully delocalize  
 851 throughout the entire backbone, especially in P(gNDI-gT2), which exhibits a strong localization  
 852 effect in its spin density distribution (Supplementary Fig. 56). These observations imply their weak  
 853 charge transport abilities. In positively or negatively charged tetramers, the spin density in  
 854 P(gTDPP2FT) concentrates in the core region of the backbone, whereas due to their high-spin  
 855 characteristics, P(TII-T), P(TII-2FT), and P(TII-2CIT) display completely delocalized spin density  
 856 distributions (Supplementary Fig. 57). Additionally, in P(TII-2CIT), there is a lower positive charge  
 857 distribution at the end of the tetramer (Supplementary Fig. 57), possibly influenced by the  
 858 pronounced twist in the configuration of P(TII-2CIT). This observation is more apparent in  
 859 pentamers (Supplementary Fig. 58). Overall, compared to the closed-shell polymer P(gTDPP2FT),  
 860 the three TII-based high-spin polymers with high-spin structures exhibit a more delocalized  
 861 distribution of spin density.  
 862

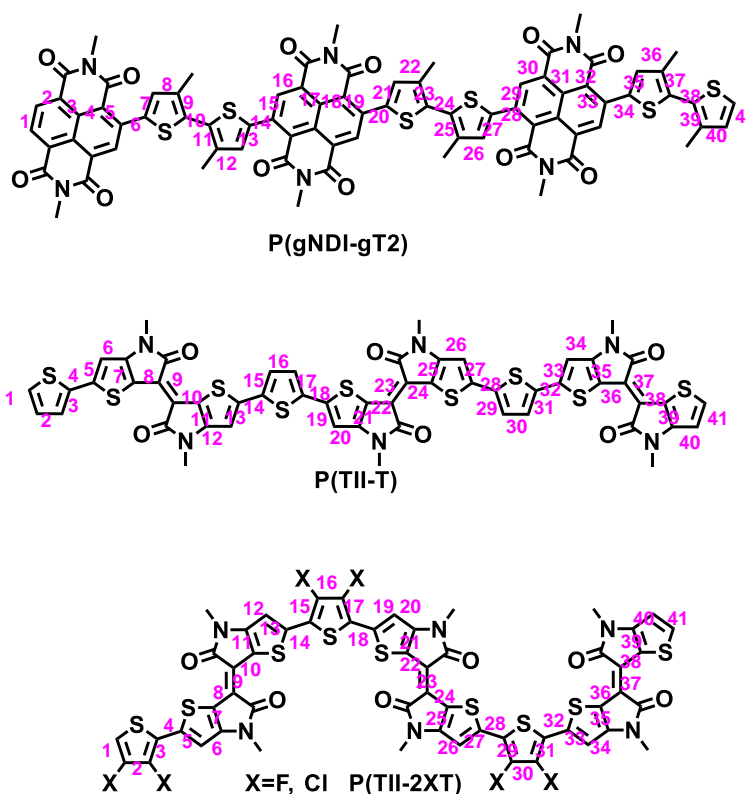

863  
 864 **Supplementary Fig. 59 Schematic diagram of single bond and double bond from index 1 to**  
 865 **index 41 along the polymer backbones for P(gNDI-gT2), P(TII-T), P(TII-2FT), and P(TII-2CIT).**  
 866

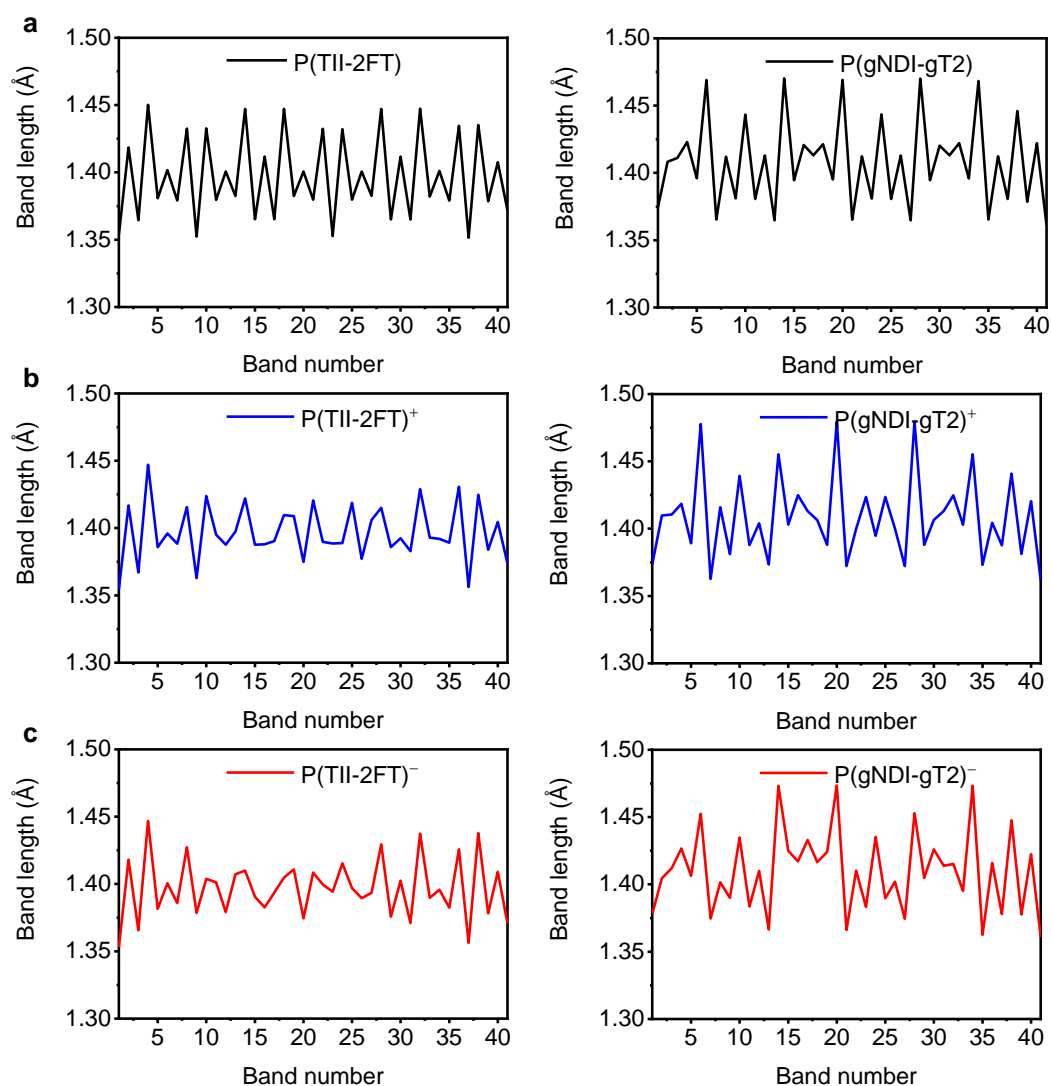

867

868 **Supplementary Fig 60. Comparison of the bond length alternation (BLA).** P(TII-2FT) and  
 869 P(gNDI-gT2), from the number 1 to the number 41 under the **a** neutral, **b** positively, and **c** negatively  
 870 charged states.

871

872 Compared to P(gNDI-gT2), P(TII-2FT) exhibits a more uniform BLA in both neutral and  
 873 positively/negatively charged states, suggesting that P(TII-2FT) has a lesser disparity between  
 874 single and double bonds, a typical feature of high-spin conjugated polymers. Besides, the calculated  
 875  $\Delta E_{ST}$  of the P(gNDI-gT2) trimer is  $-21.22$  kcal/mol, much lower than that of P(TII-2FT) ( $-11.32$   
 876 kcal/mol). This further suggests that, compared to the high-spin polymer P(TII-2FT), P(gNDI-gT2)  
 877 is more likely to have a closed-shell structure. With its high-spin nature, P(TII-2FT) possesses  
 878 enhanced backbone rigidity and planarity compared to the conventional closed-shell structure  
 879 P(gNDI-gT2), especially in doped states, thereby facilitating charge delocalization and transport



880 after heavily doping.

881

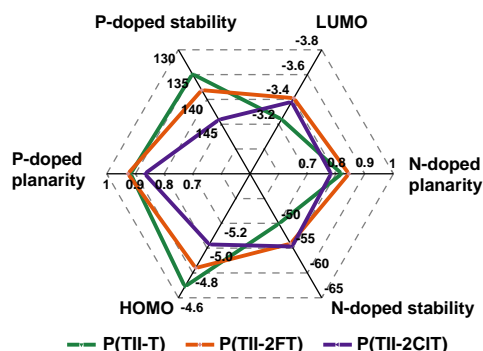

882

883 **Supplementary Fig 61. Comparison of the six important parameters of the three ambipolar**  
884 **high-spin polymers. P(TII-T), P(TII-2FT), and P(TII-2CIT).**

885

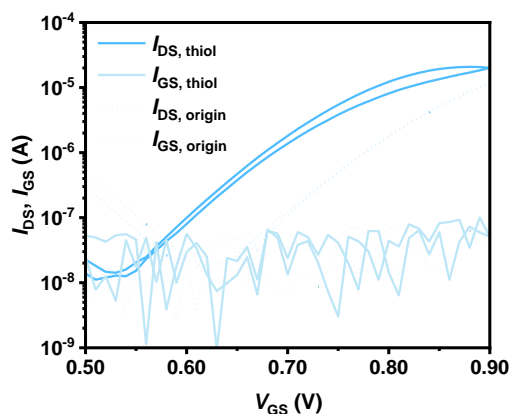

886

887 **Supplementary Fig. 62 N-type transfer characteristics of the P(TII-T) OECT devices before**  
888 (solid line) and after (dotted line) benzyl mercaptan modification. The modified transfer  
889 characteristics show a significant increase in the on-current and a decrease in the threshold voltage.

890

891 We attempted to experimentally demonstrate that the weak n-type OECT performance of P(TII-  
892 T) originates from poor electron injection from the electrode. We modified the gold source and drain  
893 electrodes using benzyl mercaptan to lower the electrode work function. Consequently, the n-type  
894 OECT performance of P(TII-T) improved, with an increased on-current and a smaller  $V_{th}$   
895 (Supplementary Fig. 62). This result supports our assumption that the unmatched LUMO energy  
896 level of P(TII-T) impedes efficient electron injection, consistent with the results shown in the radar  
897 chart (Supplementary Fig. 61).

898 In conclusion, despite its ability to accept electrons due to its high-spin nature, the unmatched  
899 molecular energy levels of P(TH-T) upon n-type doping hinder efficient electron injection and  
900 transport. Thus, P(TH-T) does not exhibit ideal n-type OECT performance.

901

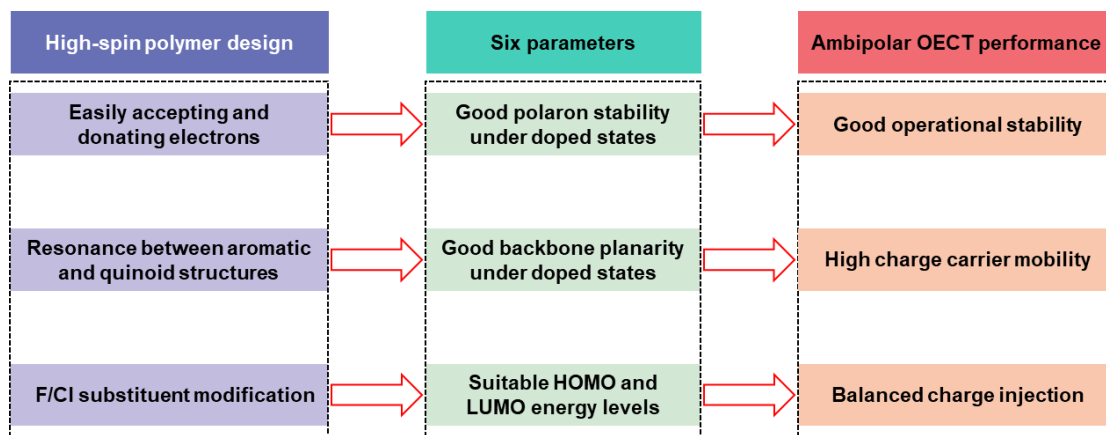

902

903 **Supplementary Fig. 63 Schematic illustration of the relationship among the polymer's spin**  
904 **nature, the six parameters, and the ambipolar OECT performance in devices.**

905

906 In Supplementary Fig. 63, our “high-spin polymer design” affects the ambipolar OECT  
907 performance through six parameters. The design strategy can be understood in the following three  
908 aspects: (1) A high-spin conjugated polymer has an open-shell electronic structure, which allows it  
909 to readily accept and donate electrons due to two electrons occupying two nearly degenerate frontier  
910 orbitals, making the generated polaron more stable after electrochemical doping (*Chem. Rev.* 123,  
911 10468-10526 (2023); *Chem* 7, 333-357 (2021)). (2) In high-spin conjugated polymers, the bond  
912 order of the chemical bonds between two building blocks is around 1.5 (between the typical single  
913 and double bond orders) due to the interconversion of aromatic and quinoid structures. This feature  
914 makes the high-spin polymers more planar than traditional closed-shell polymers (*Chem. Soc. Rev.*  
915 41, 7857-7889 (2012); *Chem. Rev.* 119, 11291-11351 (2019)). (3) Suitable substituent modification  
916 could tune the energy levels of the high-spin polymers for effective electron/hole injection. To  
917 achieve ideal ambipolar OECT performance, both efficient and stable charge transport and injection,  
918 should be considered. These require systematic molecular-level engineering. Unlike OFETs, which  
919 operate in neutral or lightly doped states, OECT materials usually operate under heavily doped states.  
920 To acquire stable polarons, OECT materials should have a smaller energy increase in the p-doped  
921 state or a larger energy decrease in the n-doped state than the molecular energy in the neutral state.



922 Besides, a more planar polaron backbone could lead to more efficient intrachain charge  
923 delocalization and interchain hopping (due to better interchain  $\pi$ - $\pi$  stacking), which are beneficial  
924 for efficient charge transport. For efficient charge injection, a higher HOMO level is favorable for  
925 hole injection, and a lower LUMO level is favorable for electron injection. Based on these  
926 considerations, we propose six parameters (polaron stability, backbone planarity after doping, and  
927 HOMO and LUMO energy levels) as listed in Supplementary Fig. 63 to correlate our high-spin  
928 design with the ideal ambipolar OECT performance.

929 In our work, the polymer P(TII-T) was designed based on the first two principles. With its  
930 high-spin character, P(TII-T) could easily accept and donate electrons, providing good polaron  
931 stability after doping. The interconversion of aromatic and quinoid structures makes P(TII-T) a very  
932 planar polaron backbone. However, these capabilities do not ensure that the energy levels of P(TII-  
933 T) are suitable for effective hole/electron injection. From the six-parameter analysis (Supplementary  
934 Fig. 61), the HOMO energy level of P(TII-T) is good for hole injection, but its LUMO energy level  
935 is too high for electron injection. Therefore, we further designed and synthesized two other polymers  
936 based on P(TII-T), P(TII-2FT) and P(TII-2ClT), with two fluorine or chlorine atoms substituted on  
937 the thiophene to reduce the frontier orbital energy levels for more efficient electron injection. Both  
938 P(TII-2FT) and P(TII-2ClT) show more efficient electron injection and balanced OECT  
939 performance than P(TII-T), indicating that suitable HOMO/LUMO energy levels are necessary for  
940 our high-spin polymer design.

941

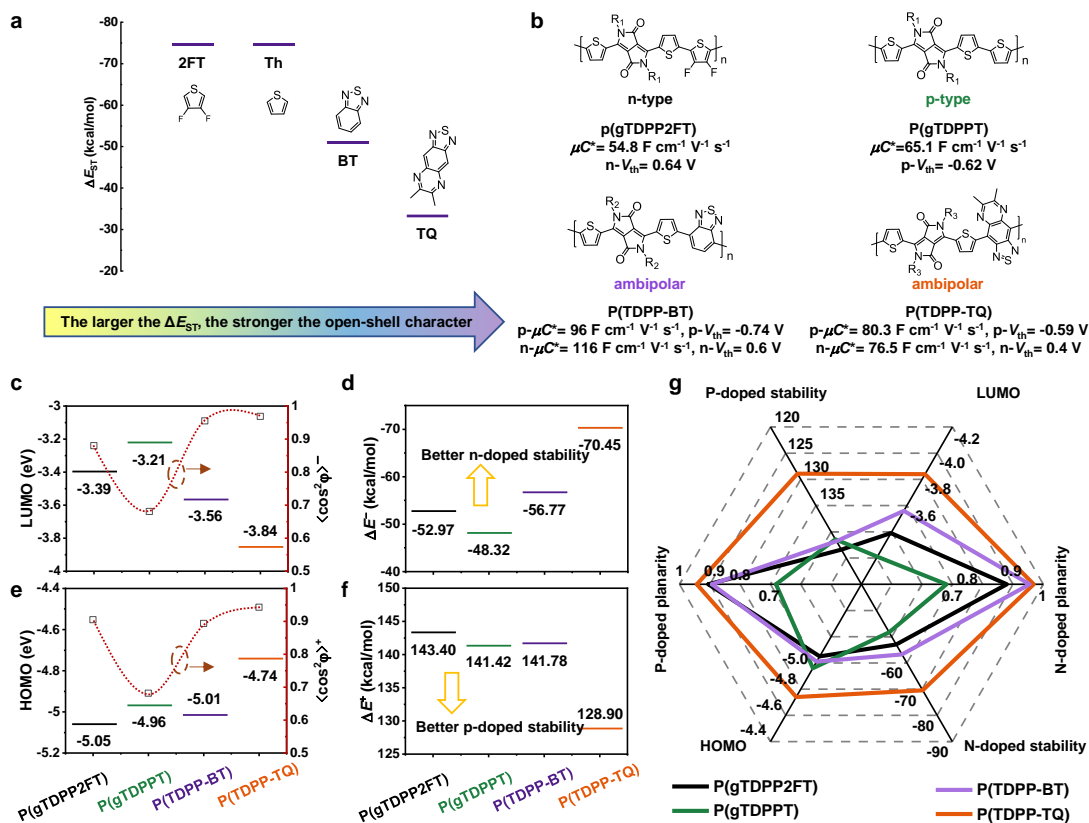

942

943

**Supplementary Fig. 64 Generality of our high-spin polymer design strategy in the TDPP**

944

**polymer system. a** Calculated  $\Delta E_{ST}$  values of the four comonomers used for the TDPP polymer

945

system study. **b** Chemical structures, measured  $\mu C^*$  values, and threshold voltages of the four

946

polymers: P(gTDPP2FT) (n-type), P(gTDPPT) (p-type), P(TDPP-BT) (ambipolar), and P(TDPP-

947

TQ) (ambipolar). The side chains of each polymer are omitted for clarity. Although P(TDPP-BT)

948

showed higher p-type and n-type  $\mu C^*$  values than P(TDPP-TQ), P(TDPP-BT) is a typical

949

unbalanced ambipolar polymer, exhibiting electron-dominant transport behavior, and the p-type

950

$\mu C^*$  value may be overestimated due to the large threshold voltage in the p-type operation regime

951

(Supplementary Fig. 65a, c). **c** LUMO energy levels and n-doped backbone planarity.  $\langle \cos^2 \phi \rangle^-$  is

952

the  $\langle \cos^2 \phi \rangle$  value of the polymer in a negatively charged state. **d** N-doped stability ( $\Delta E^-$ ). **e** HOMO

953

energy levels and p-doped backbone planarity.  $\langle \cos^2 \phi \rangle^+$  is the  $\langle \cos^2 \phi \rangle$  value of the polymer in a

954

positively charged state. **f** P-doped stability ( $\Delta E^+$ ). **g** Comparison of the six parameters affecting the

955

device performance of the four TDPP polymers.

956

957

Four commonly used building blocks with different  $\Delta E_{ST}$  values were employed as the

958

comonomers. As shown in Supplementary Fig. 64a, the  $\Delta E_{ST}$  values of the four comonomers, 2FT,

959

Th, BT, and TQ, increase sequentially, indicating a gradual enhancement of their open-shell

960

characteristics. By polymerizing with the TDPP segment, four polymers, P(gTDPP2FT),

961

P(gTDPPT), P(TDPP-BT), and P(TDPP-TQ), were obtained. The first two closed-shell structures

962 were reported in our previous work (*Nat. Commun.* 13, 5970 (2022)), while the latter two are newly  
963 synthesized with the high-spin structures for comparison. Regarding their OECT performance,  
964 P(gTDPP2FT) exhibits unipolar n-type behavior, and P(gTDPPPT) exhibits unipolar p-type behavior,  
965 while both P(TDPP-BT) and P(TDPP-TQ) exhibit ambipolar behaviors (Supplementary Fig. 65),  
966 demonstrating the effectiveness of our molecular design strategy. Further theoretical calculations  
967 were conducted to study the molecular energy levels, planarity, and stability of the four polymers  
968 (Supplementary Fig. 66). P(gTDPPPT) has higher HOMO energy levels and good p-doped stability  
969 (Supplementary Fig. 64e, f), occupying the left half of the radar chart, aligning well with its p-type  
970 OECT behavior. Similarly, P(gTDPP2FT) occupies the right half of the radar chart (Supplementary  
971 Fig. 64g), consistent with its good n-type OECT performance. P(TDPP-BT) and P(TDPP-TQ) span  
972 both areas, indicating they could have ambipolar charge transport properties. However, compared  
973 to P(TDPP-TQ), the lower HOMO energy level of P(TDPP-BT) results in poor p-type OECT  
974 performance. This is well supported by the P(TDPP-BT) OECT device results (Supplementary Fig.  
975 65a-d). P(TDPP-BT) exhibited good n-type OECT output and transfer characteristics, whereas in  
976 the p-type operation regime, it exhibited high threshold voltage ( $V_{Th}$ ), low transconductance, and  
977 possibly overestimated p-type  $\mu C^*$  values (*Nat. Mater.* 23, 2–8 (2024)). The high-spin polymer  
978 P(TDPP-TQ) has appropriate HOMO/LUMO energy levels, good p-type/n-type doped stability, and  
979 backbone planarity, which enable the polymer to exhibit balanced, efficient, and stable ambipolar  
980 OECT performance. The significant differences between P(TDPP-BT) and P(TDPP-TQ) further  
981 demonstrate that the six parameters are critical for their ambipolar OECT performance.

982 In summary, the above results demonstrate that our high-spin polymer design strategy is not  
983 limited to the TII system but can also be applied to other polymer systems, such as the TDPP system.  
984 Therefore, we successfully demonstrate the generality of our molecular design strategy and are  
985 currently exploring its applicability to more polymer systems.

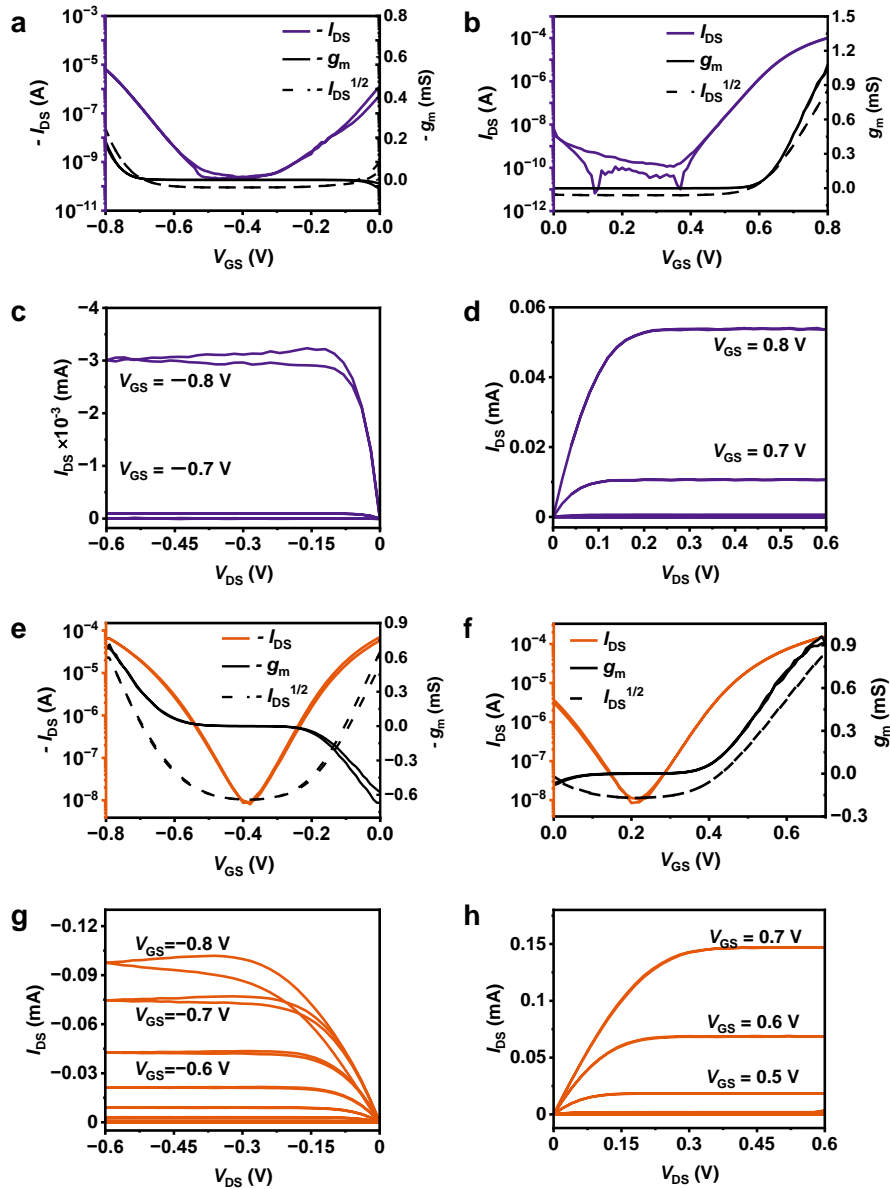

986

987 **Supplementary Fig. 65 Transfer and output characteristics of OECT devices based on**  
 988 **P(TDPP-BT) and P(TDPP-TQ).** Typical p-type/n-type OECT transfer characteristics based on a/b  
 989 P(TDPP-BT) and e/f P(TDPP-TQ). Typical p-type/n-type OECT output characteristics based on c/d  
 990 P(TDPP-BT) and g/h P(TDPP-TQ).

991

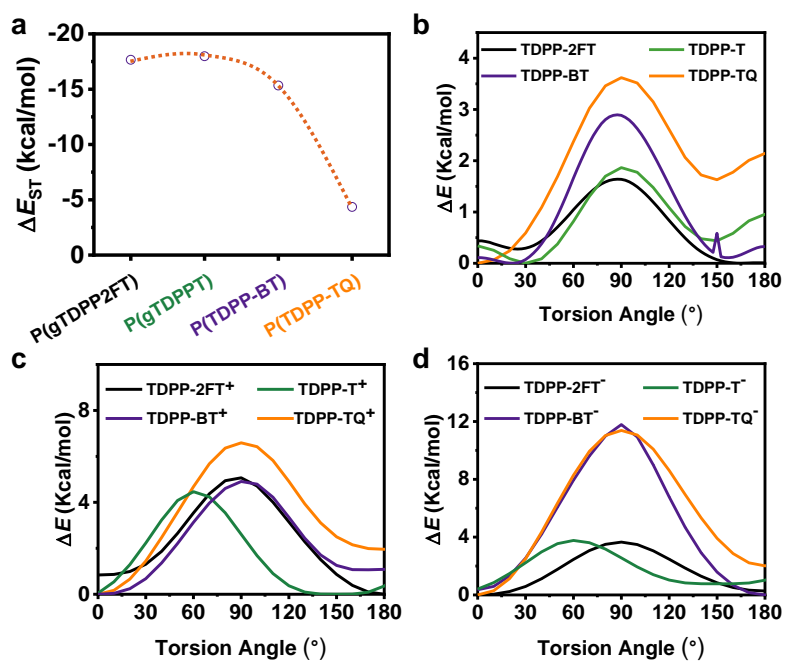

992

993 **Supplementary Fig. 66 Comparison of the  $\Delta E_{ST}$  values and the relaxed PES scans of the four**  
 994 **DPP polymers.** **a** Calculated  $\Delta E_{ST}$  values of the trimers of P(gTDPP2FT), P(gTDPPT), P(TDPP-  
 995 BT), and P(TDPP-TQ). These values indicate that the open-shell characteristics increase in the  
 996 following order: P(gTDPPT) < P(gTDPP2FT) < P(TDPP-BT) < P(TDPP-TQ). Comparison of the  
 997 relaxed PES scans of the torsional angles for the four monomers under **b** neutral, **c** positively, and  
 998 **d** negatively charged states.

999

1000

1001

### 1002 3. Synthesis and Characterization of New Compounds

#### 1003 Synthesis of compound 2Cl-T-2Sn

1004 A solution of **2Cl-T** (177 mg, 1.16 mmol) in dry THF (20 mL) under argon was cooled to  $-78\text{ }^{\circ}\text{C}$ ,  
1005 and 2.89 mL (2.89 mmol) of LDA (1 M in THF) was slowly added (over 10 min). The mixture was  
1006 then stirred for 30 min at  $-78\text{ }^{\circ}\text{C}$ , and 2.54 mL (2.54 mmol) of trimethyltin chloride (1 M in THF)  
1007 was added in 3 min. The mixture was stirred for 1 h at  $-78\text{ }^{\circ}\text{C}$ . The reaction was then quenched by  
1008 adding 40 mL of anhydrous methanol. The mixture was extracted with DCM. The combined organic  
1009 layers were dried over  $\text{MgSO}_4$  and concentrated. The product was purified by chromatography on  
1010 silica gel to yield a colorless oil, **2Cl-T-2Sn** (389 mg, 70.0%).  $^1\text{H}$  NMR (400 MHz,  $\text{CDCl}_3$ , 298 K,  
1011 ppm):  $\delta$  0.44 (s, 18H,  $\text{CH}_3$ ).  $^{13}\text{C}$  NMR (101 MHz,  $\text{CDCl}_3$ , 298 K, ppm):  $\delta$  138.74, 132.02. FTMS  
1012 ( $m/z$ ): calcd. for  $\text{C}_{10}\text{H}_{18}\text{Cl}_2\text{SSn}_2$ : 479.8550 (100%), Found: 499.0826 ( $\text{M} + \text{H}_3\text{O}^+$ , 100%).

#### 1013 Synthesis of compound TII-PEG-7

1014 Under a nitrogen atmosphere, **TII-H** (448 mg, 1.63mmol) and potassium carbonate (1.33 g, 4.09  
1015 mmol) were added to 25 mL of *N,N*-dimethylformamide. After heating the mixture to  $80\text{ }^{\circ}\text{C}$ , **R-Br**  
1016 (1.45 g, 3.60 mmol) in DMF (5 mL) was added dropwise into the mixture and stirred for 12 h. After  
1017 cooling to room temperature (RT), the mixture was washed with water and extracted with DCM.  
1018 The residue was purified by silica gel column chromatography using EA/MeOH (*v:v*, 30/1) as the  
1019 eluent to get a red oil, **TII-PEG-7** (950 mg, 63.3%).  $^1\text{H}$  NMR (400 MHz,  $\text{CDCl}_3$ , 298 K, ppm):  $\delta$   
1020 7.51-7.50 (d,  $J = 4.2\text{ Hz}$ , 2H, Th-*H*), 6.97-6.95 (d,  $J = 4.2\text{ Hz}$ , 2H, Th-*H*), 4.01-3.99 (t,  $J = 5.9\text{ Hz}$ ,  
1021 4H,  $\text{CH}_2$ ), 3.76-3.73 (m, 4H,  $\text{CH}_2$ ), 3.63-3.54 (m, 48H,  $\text{CH}_2$ ), 3.37 (s, 6H,  $\text{CH}_3$ ).  $^{13}\text{C}$  NMR (101  
1022 MHz,  $\text{CDCl}_3$ , 298 K, ppm):  $\delta$  171.09, 151.71, 134.00, 120.83, 114.11, 112.64, 71.87, 70.58, 70.54,  
1023 70.50, 70.45, 70.21, 69.64, 61.62, 58.98, 41.85, 29.63. FTMS ( $m/z$ ): calcd. for  $\text{C}_{42}\text{H}_{66}\text{N}_2\text{O}_{16}\text{S}_2$ :  
1024 918.3854 (100%), Found: 941.3752 ( $\text{M} + \text{Na}^+$ , 100%).

#### 1025 Synthesis of compound TII-PEG-7-2Br

1026 **TII-PEG-7** (143 mg, 0.155 mmol) was added to 20 mL of anhydrous chloroform in a nitrogen  
1027 atmosphere. After liquid bromine (16.3  $\mu\text{L}$ , 0.318 mmol) was added slowly at  $0\text{ }^{\circ}\text{C}$ , the mixture was

1028 stirred at dark environment for 2 h. After the reaction was quenched by a NaHSO<sub>4</sub> aqueous solution,  
1029 the mixture was washed with water and extracted with DCM. The residue was purified by silica gel  
1030 column chromatography using EA/MeOH (*v:v*, 40/1) as the eluent to get a red oil, **TII-PEG-7-2Br**  
1031 (150 mg, 90.1%). <sup>1</sup>H NMR (400 MHz, CDCl<sub>3</sub>, 298 K, ppm): δ 7.04 (s, 2H, Th-*H*), 3.96-3.93 (t, *J*=  
1032 5.2 Hz, 4H, CH<sub>2</sub>), 3.72-3.70 (m, 4H, CH<sub>2</sub>), 3.64-3.53 (m, 48H, CH<sub>2</sub>), 3.37 (s, 6H, CH<sub>3</sub>). <sup>13</sup>C NMR  
1033 (101 MHz, CDCl<sub>3</sub>, 298 K, ppm): δ 170.18, 150.51, 122.58, 119.49, 116.65, 114.59, 71.89, 70.65,  
1034 70.62, 70.56, 70.53, 70.47, 69.77, 58.99, 42.00. FTMS (*m/z*): calcd. for C<sub>42</sub>H<sub>64</sub>Br<sub>2</sub>N<sub>2</sub>O<sub>16</sub>S<sub>2</sub>:  
1035 1074.2064 (100%), Found: 1097.1952 (M + Na<sup>+</sup>, 100%).

### 1036 **Synthesis of polymer P(TII-T)**

1037 Tetratriphenylphosphine palladium (1.35 mg, 1.20 μmol), cuprous iodide (0.44 mg, 2.30 μmol), **T-**  
1038 **2Sn** (25.25 mg, 61.3 μmol), and **TII-PEG-7-2Br** (62.7 mg, 58.0 μmol) were combined in a 25 mL  
1039 Schlenk tube with toluene/*N*-methylpyrrolidone (5 mL/5 mL). The tube was purged with nitrogen  
1040 through a freeze-pump-thaw cycle three times. The sealed tube was then heated to 115 °C and stirred  
1041 for 48 h. After cooling the reaction mixture to room temperature, diethylphenylazothioformamide  
1042 (3 mg) was added to remove the catalyst and the resulting mixture was stirred at 80 °C for 1 h. The  
1043 reaction mixture was poured into 50 mL of hexane to precipitate and filter the polymer. The solid  
1044 polymer was placed in a Soxhlet extractor and extracted with hexane, methanol, acetone, and  
1045 chloroform. The chloroform solution was concentrated under reduced pressure and then poured into  
1046 20 mL of hexane to reprecipitate the polymer, **P(TII-T)**. The suspension was filtered and dried under  
1047 vacuum to obtain the polymer. <sup>1</sup>H NMR (400 MHz, CDCl<sub>3</sub>, 298 K, ppm): δ 7.07, 6.99, 6.87, 6.81,  
1048 3.90-3.35; *M<sub>n</sub>*: 11.1 kDa; *M<sub>w</sub>*: 29.3 kDa; PDI: 2.64.

### 1049 **Synthesis of polymer P(TII-2FT)**

1050 Tetratriphenylphosphine palladium (1.11 mg, 0.960 μmol), cuprous iodide (0.370 mg, 1.92 μmol),  
1051 **2FT-2Sn** (22.5 mg, 50.4 μmol), **TII-PEG-7-2Br** (51.6 mg, 48.0 μmol), and toluene/*N*-  
1052 methylpyrrolidone (3 mL/3 mL) were added in a 25 mL Schlenk tube. The tube was purged with  
1053 nitrogen through a freeze-pump-thaw cycle three times. The sealed tube was then heated to 115 °C  
1054 and stirred for 48 h. After cooling the reaction mixture to room temperature,  
1055 diethylphenylazothioformamide (3 mg) was added to remove the catalyst and the resulting mixture

1056 was stirred at 80 °C for 1 h. The reaction mixture was poured into 50 mL of hexane to precipitate  
1057 and filter the polymer. The solid polymer was placed in a Soxhlet extractor and extracted with  
1058 hexane, methanol, acetone, and chloroform. The chloroform solution was concentrated under  
1059 reduced pressure and then poured into 20 mL of hexane to reprecipitate the polymer, **P(TII-2FT)**.  
1060 The suspension was filtered and dried under vacuum to obtain the polymer. <sup>1</sup>H NMR (400 MHz,  
1061 CDCl<sub>3</sub>, 298 K, ppm): δ 6.84, 6.82, 6.67, 3.72-3.33; *M<sub>n</sub>*: 8.48 kDa; *M<sub>w</sub>*: 24.1 kDa; PDI: 2.84.

#### 1062 **Synthesis of polymer P(TII-2CIT)**

1063 Tetratriphenylphosphine palladium (1.22 mg, 1.10 μmol), cuprous iodide (0.400 mg, 2.10 μmol),  
1064 **2CIT-2Sn** (26.7 mg, 55.5 μmol), **TII-PEG-7-2Br** (56.9 mg, 53.0 μmol), and toluene/*N*-  
1065 methylpyrrolidone (4 mL/4 mL) was added in a 25 mL Schlenk tube. The tube was purged with  
1066 nitrogen through a freeze-pump-thaw cycle three times. The sealed tube was then heated to 115 °C  
1067 and stirred for 48 h. After cooling the reaction mixture to room temperature,  
1068 diethylphenylazothioformamide (3 mg) was added to remove the catalyst and the resulting mixture  
1069 was stirred at 80 °C for 1 h. The reaction mixture was poured into 50 mL of hexane to precipitate  
1070 and filter the polymer. The solid polymer was placed in a Soxhlet extractor and extracted with  
1071 hexane, methanol, acetone, and chloroform. The chloroform solution was concentrated under  
1072 reduced pressure and then poured into 20 mL of hexane to reprecipitate the polymer, **P(TII-2CIT)**.  
1073 The suspension was filtered and dried under vacuum to obtain the polymer. <sup>1</sup>H NMR (400 MHz,  
1074 CDCl<sub>3</sub>, 298 K, ppm): δ 6.54, 6.33, 3.71-3.32; *M<sub>n</sub>*: 6.40 kDa; *M<sub>w</sub>*: 17.7 kDa; PDI: 2.76.



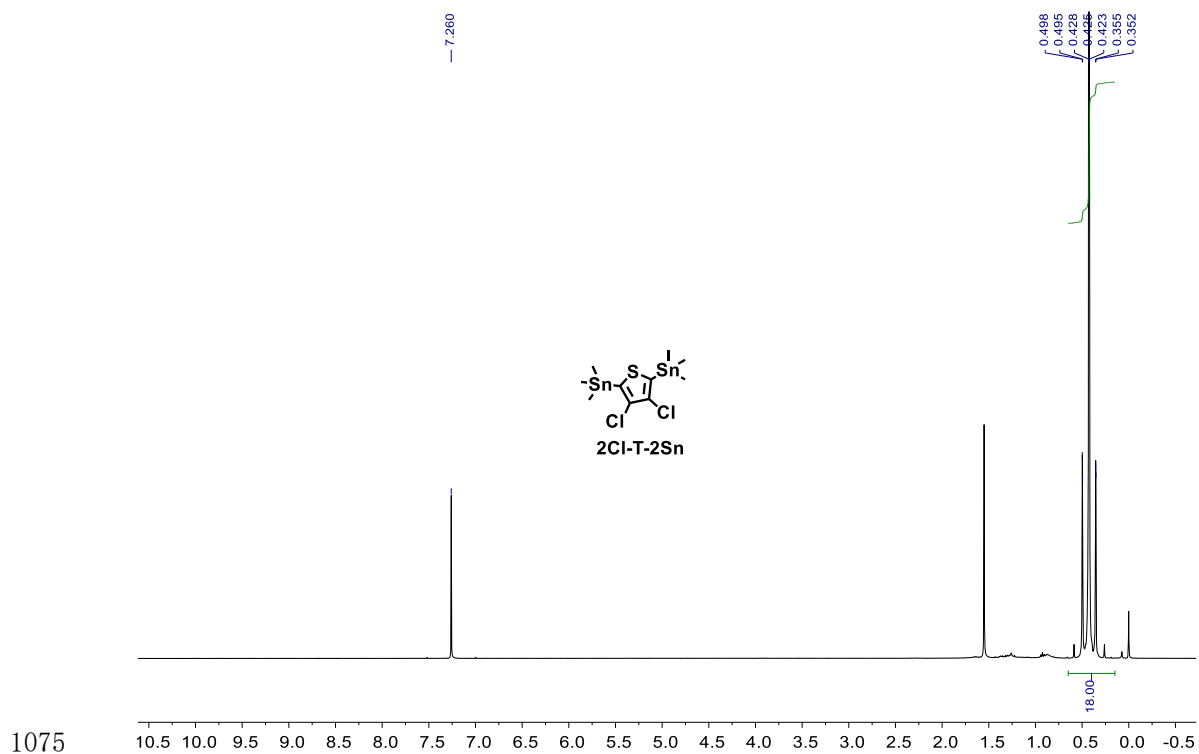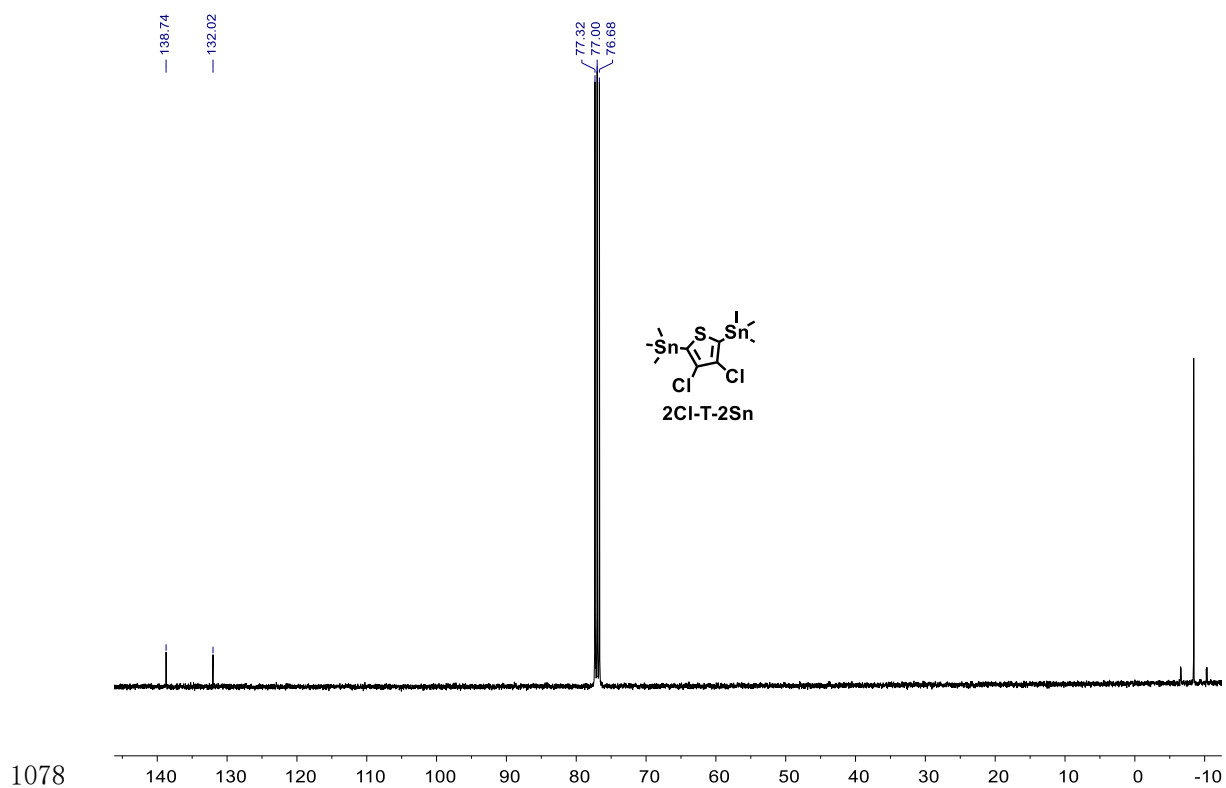

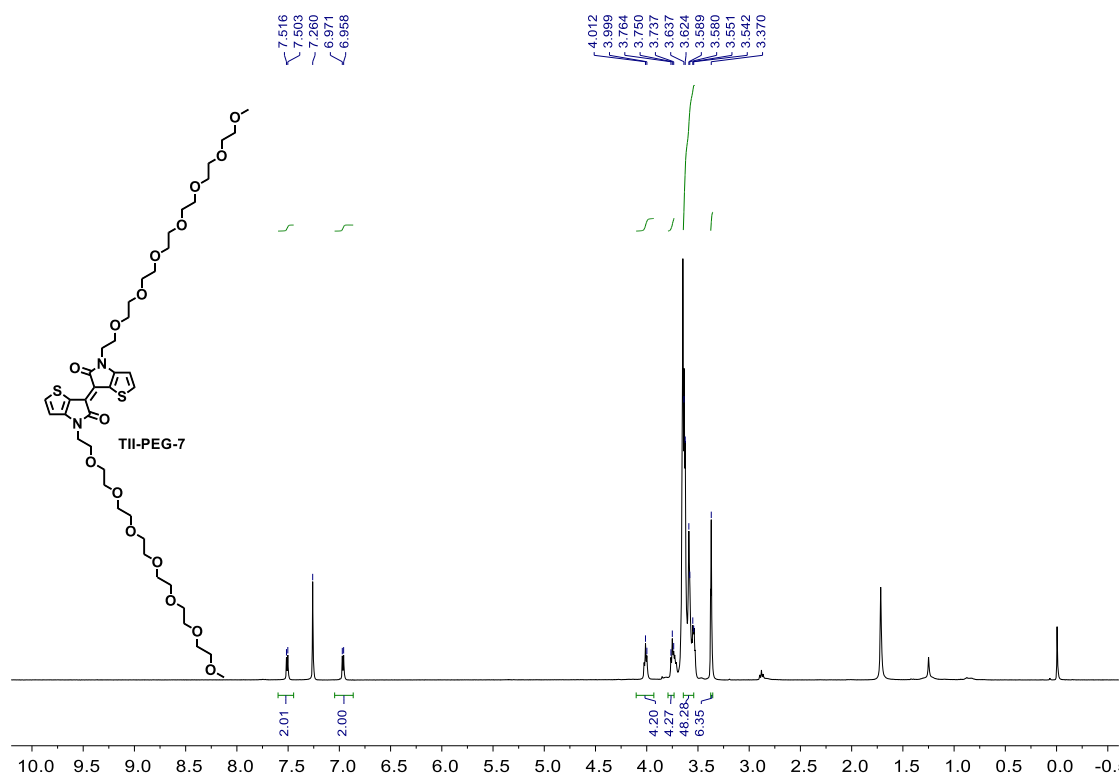

1081

1082 **Supplementary Fig. 69**  $^1\text{H}$  NMR spectrum of TII-PEG-7. The spectrum is collected using CDCl<sub>3</sub>  
 1083 as the solvent at 298 K.

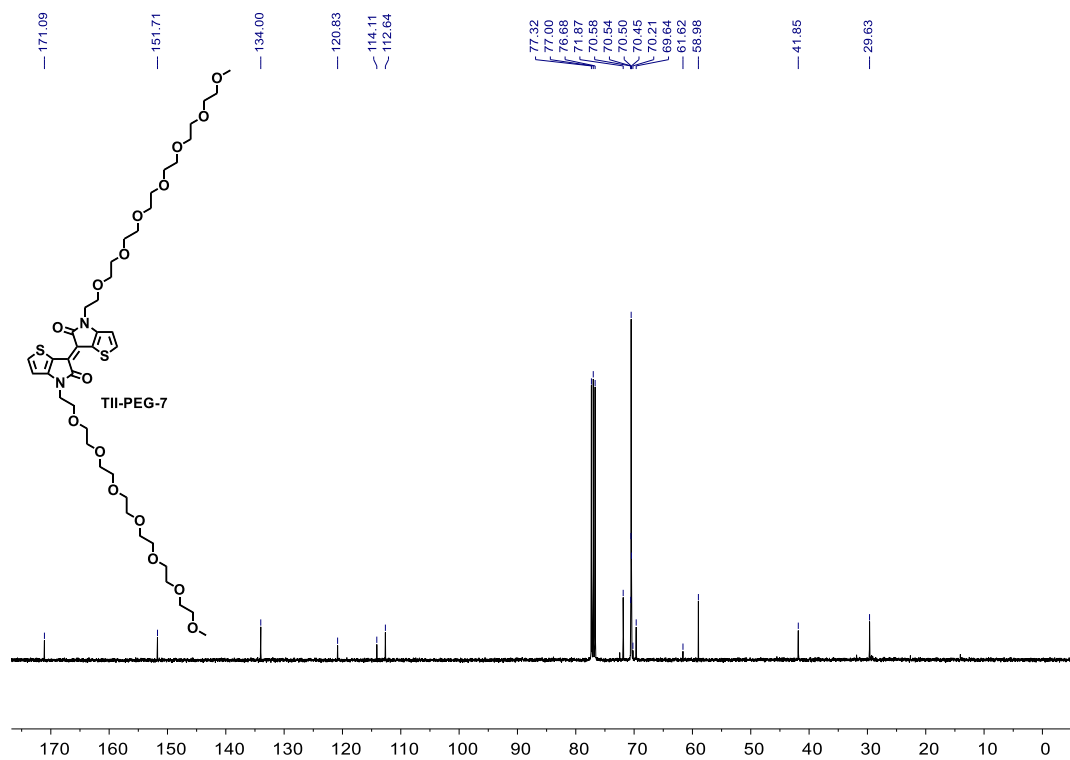

1084

1085 **Supplementary Fig. 70**  $^{13}\text{C}$  NMR spectrum of TII-PEG-7. The spectrum is collected using CDCl<sub>3</sub>  
 1086 as the solvent at 298 K.

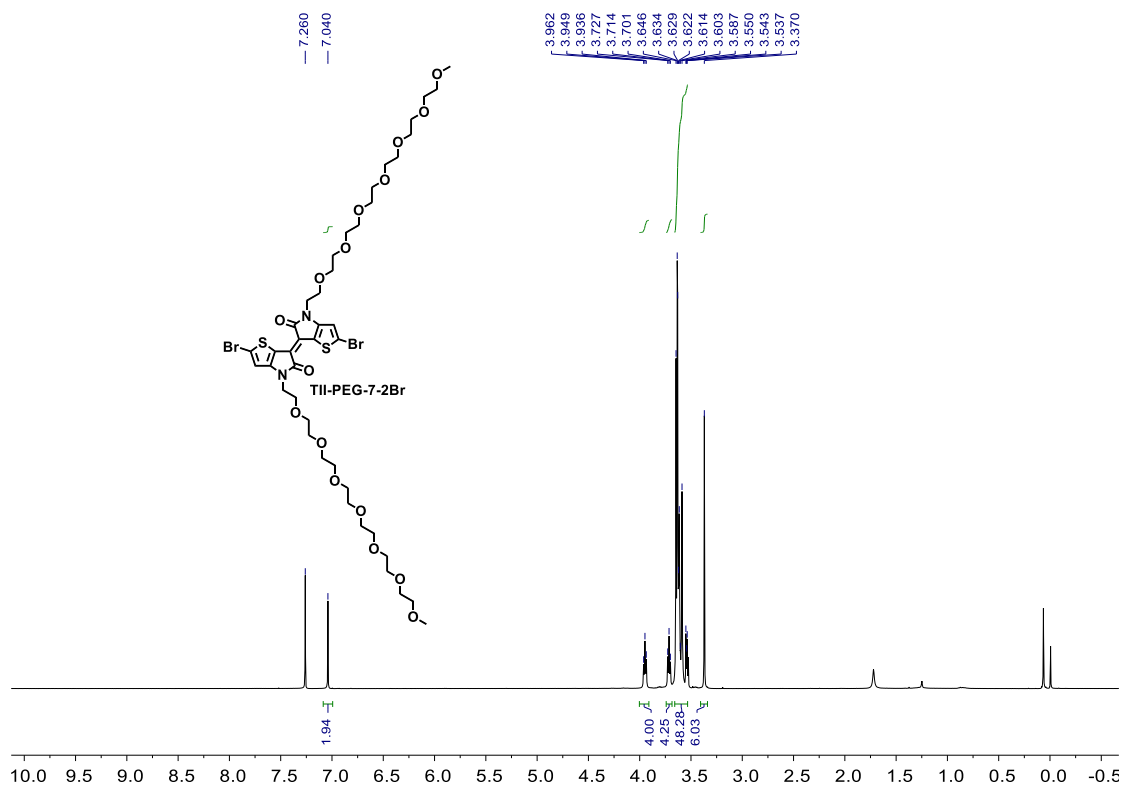

1087

1088 **Supplementary Fig. 71** <sup>1</sup>H NMR spectrum of TII-PEG-7-2Br. The spectrum is collected using  
 1089 CDCl<sub>3</sub> as the solvent at 298 K.

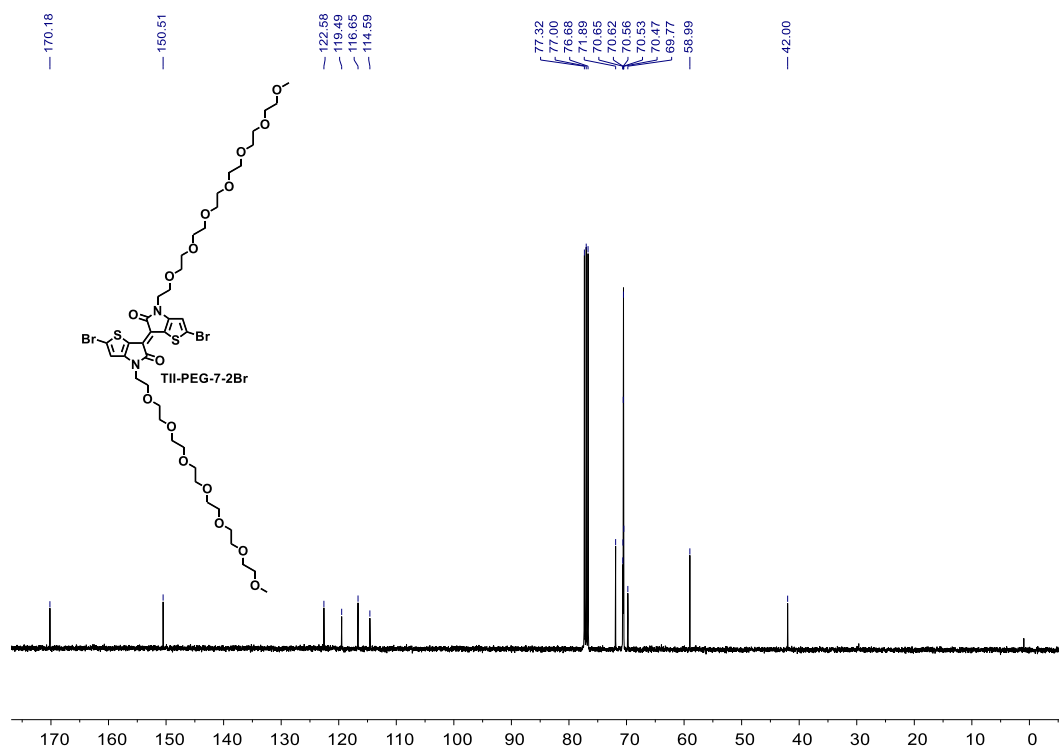

1090

1091 **Supplementary Fig. 72** <sup>13</sup>C NMR spectrum of TII-PEG-7-2Br. The spectrum is collected using  
 1092 CDCl<sub>3</sub> as the solvent at 298 K.



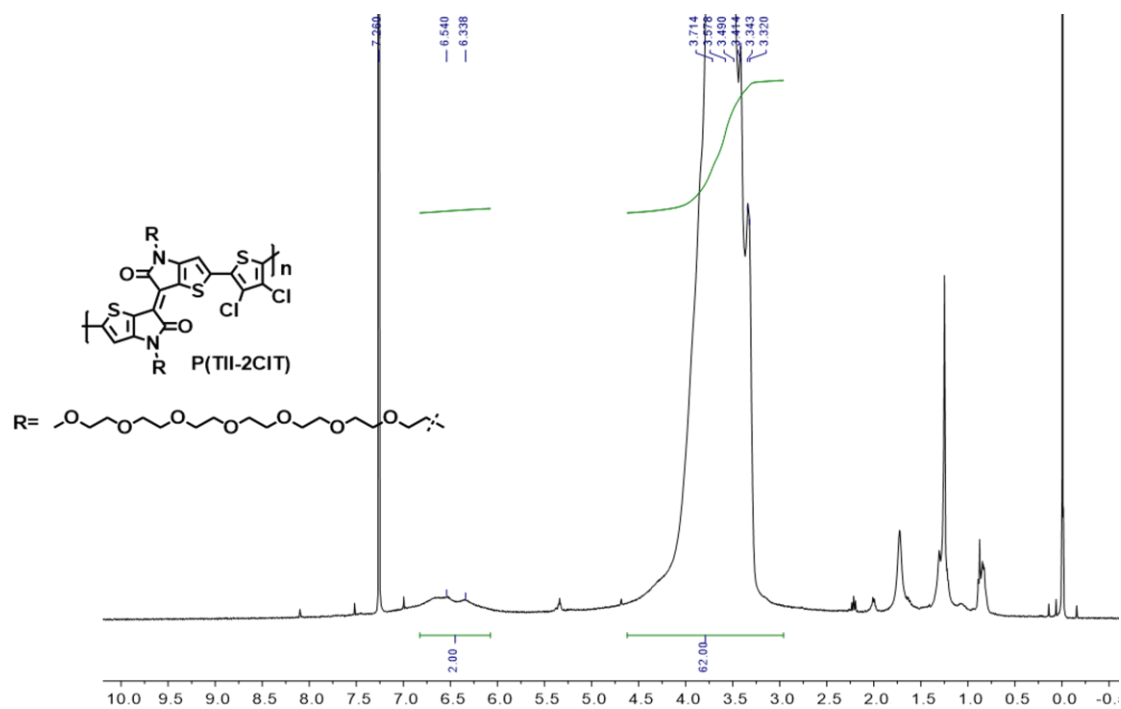

1099

1100 **Supplementary Fig. 75** <sup>1</sup>H NMR spectrum of polymer P(THI-2CIT). The spectrum is collected  
 1101 using CDCl<sub>3</sub> as the solvent at 298 K.

1102 .

1103 **4. Supplementary References**

- 1104 1 Frisch, M. *et al.* Gaussian 16 rev. C. 01, wallingford, ct. *Wallingford, CT* (2016).
- 1105 2 Dennington, R., Keith, T. A. & Millam, J. M. Gaussview, version 6.0. 16. *Semichem Inc*
- 1106 *Shawnee Mission KS* (2016).
- 1107 3 Lu, T. & Chen, F. Multiwfn: A multifunctional wavefunction analyzer. *J. Comput. Chem.*
- 1108 **33**, 580-592 (2012).
- 1109 4 Humphrey, W., Dalke, A. & Schulten, K. Vmd: Visual molecular dynamics. *J Mol Graph*
- 1110 **14**, 33-38, 27-38 (1996).
- 1111 5 Pan, Y. *et al.* An insight into the role of side chains in the microstructure and carrier
- 1112 mobility of high-performance conjugated polymers. *Polym. Chem.* **12**, 2471-2480 (2021).
- 1113 6 Wu, H.-Y. *et al.* Influence of molecular weight on the organic electrochemical transistor
- 1114 performance of ladder-type conjugated polymers. *Adv. Mater.* **34**, 2106235 (2022).
- 1115 7 Feng, K. *et al.* Fused bithiophene imide dimer-based n-type polymers for high-
- 1116 performance organic electrochemical transistors. *Angew. Chem.* **133**, 24400-24407
- 1117 (2021).
- 1118 8 Wang, Y. *et al.* Green synthesis of lactone-based conjugated polymers for n-type organic
- 1119 electrochemical transistors. *Adv. Funct. Mater.* **32**, 2111439 (2022).
- 1120 9 Li, P., Shi, J., Lei, Y., Huang, Z. & Lei, T. Switching p-type to high-performance n-type
- 1121 organic electrochemical transistors via doped state engineering. *Nat. Commun.* **13**, 5970
- 1122 (2022).
- 1123 10 Feng, K. *et al.* Cyano-functionalized n-type polymer with high electron mobility for high-
- 1124 performance organic electrochemical transistors. *Adv. Mater.* **34**, 2201340 (2022).
- 1125 11 Wang, Y. *et al.* Acceptor functionalization via green chemistry enables high-performance
- 1126 n-type organic electrochemical transistors for biosensing, memory applications. *Adv.*
- 1127 *Funct. Mater.* <https://doi.org/10.1002/adfm.202304103> (2023).
- 1128 12 Yang, W. *et al.* High-performance n-type polymeric mixed ionic-electronic conductors:
- 1129 The impacts of halogen functionalization. *Adv. Mater.*
- 1130 <https://doi.org/10.1002/adma.202305416> (2023).
- 1131 13 Giovannitti, A. *et al.* N-type organic electrochemical transistors with stability in water.
- 1132 *Nat. Commun.* **7**, 13066 (2016).

1133 14 Samuel, J. J. *et al.* Single-component cmos-like logic using diketopyrrolopyrrole-based  
1134 ambipolar organic electrochemical transistors. *Adv. Funct. Mater.* **31**, 2102903 (2021).

1135 15 Rashid, R. B. *et al.* Ambipolar inverters based on cofacial vertical organic  
1136 electrochemical transistor pairs for biosignal amplification. *Sci. Adv.* **7**, eabh1055 (2021).

1137 16 Ohayon, D. *et al.* Influence of side chains on the n-type organic electrochemical transistor  
1138 performance. *ACS Appl. Mater. Interfaces* **13**, 4253-4266 (2021).

1139 17 Stein, E. *et al.* Ambipolar blend-based organic electrochemical transistors and inverters.  
1140 *Nat. Commun.* **13**, 5548 (2022).

1141 18 Wu, X. *et al.* All-polymer bulk-heterojunction organic electrochemical transistors with  
1142 balanced ionic and electronic transport. *Adv. Mater.* **34**, 2206118 (2022).

1143 19 Jeong, S. Y. *et al.* Ion gel-gated quasi-solid-state vertical organic electrochemical  
1144 transistor and inverter. *Adv. Electron. Mater.* **9**, 2300053 (2023).

1145 20 Hou, K. *et al.* High performance, flexible, and thermally stable all-solid-state organic  
1146 electrochemical transistor based on thermoplastic polyurethane ion gel. *ACS Appl.*  
1147 *Electron. Mater.* **5**, 2215-2226 (2023).

1148 21 Sun, H. *et al.* Complementary logic circuits based on high-performance n-type organic  
1149 electrochemical transistors. *Adv. Mater.* **30**, 1704916 (2018).

1150 22 Zhang, Y. *et al.* High-performance organic electrochemical transistors and neuromorphic  
1151 devices comprising naphthalenediimide-dialkoxybithiazole copolymers bearing glycol  
1152 ether pendant groups. *Adv. Funct. Mater.* **32**, 2201593 (2022).

1153 23 Ma, S. *et al.* Sequential cyanation of polythiophenes: Tuning charge carrier polarity in  
1154 organic electrochemical transistors. *Adv. Electron. Mater.* **n/a**, 2300207

1155 24 Cho, K. G., Seol, K. H., Kim, M. S., Hong, K. & Lee, K. H. Tuning threshold voltage of  
1156 electrolyte-gated transistors by binary ion doping. *ACS Appl. Mater. Interfaces* **14**, 50004-  
1157 50012 (2022).

1158 25 Zabihipour, M. *et al.* Organic electrochemical transistors manufactured by laser ablation  
1159 and screen printing. *Flex. Print. Electron.* **7**, 035018 (2022).

1160 26 Granelli, R. *et al.* High-performance bioelectronic circuits integrated on biodegradable  
1161 and compostable substrates with fully printed mask-less organic electrochemical  
1162 transistors. *Small* **18**, 2108077 (2022).

- 1163 27 Romele, P., Ghittorelli, M., Kovács-Vajna, Z. M. & Torricelli, F. Ion buffering and  
1164 interface charge enable high performance electronics with organic electrochemical  
1165 transistors. *Nat. Commun.* **10**, 3044 (2019).
- 1166 28 Wu W, *et al.* Selenophene Substitution Enabled High-Performance n-Type Polymeric  
1167 Mixed Ionic-Electronic Conductors for Organic Electrochemical Transistors and Glucose  
1168 Sensors. *Adv. Mater.* **36**, 2310503 (2024).
- 1169 29 Moser M, *et al.* Side Chain Redistribution as a Strategy to Boost Organic Electrochemical  
1170 Transistor Performance and Stability. *Adv. Mater.* **32**, 2002748 (2020).
- 1171 30 Wu X, Liu Q, Surendran A, Bottle SE, Sonar P, Leong WL. Enhancing the  
1172 Electrochemical Doping Efficiency in Diketopyrrolopyrrole-Based Polymer for Organic  
1173 Electrochemical Transistors. *Adv Electron. Mater.* **7**, 2000701 (2021).
- 1174 31 Leydecker T, Wang ZM, Torricelli F, Orgiu E. Organic-based inverters: basic concepts,  
1175 materials, novel architectures and applications. *Chemical Society Reviews* **49**, 7627-7670  
1176 (2020).
- 1177
